# Supplementary material for: A new approach to the synthesis of functional derivatives of nido-carborane: alkylation of [9-MeS-nido-7,8-C2B9H11]−
Source: Royal Society of Chemistry journal article supplement (doi:10.1039/c3dt52845f), 2013-11-11
Supplement: c3dt52845f.pdf [file c3dt52845f.pdf]

## SUPPLEMENTARY INFORMATION

### New approach to synthesis of functional derivatives of *nido*-carborane: Alkylation of [9-MeS-*nido*-7,8-C<sub>2</sub>B<sub>9</sub>H<sub>11</sub>]

Maria V. Zakharova<sup>a,b</sup>, Igor B. Sivaev<sup>a</sup>, Sergey A. Anufriev<sup>a</sup>, Sergey V. Timofeev<sup>a</sup>,  
Kyrill Yu. Suponitsky<sup>a</sup>, Ivan A. Godovikov<sup>a</sup>, Vladimir I. Bregadze<sup>a\*</sup>

<sup>a</sup> A. N. Nesmeyanov Institute of Organoelement Compounds, Russian Academy of Sciences, 28 Vavilov Str., 119991, Moscow, Russia

<sup>b</sup> Present address: Department of Chemistry, Universite Laval, 1045 Avenue de la Medecine, G1V 0A6, Quebec City, Canada

Figure S1. <sup>11</sup>B{<sup>1</sup>H} NMR spectrum of [9-Et(Me)S-*nido*-7,8-C<sub>2</sub>B<sub>9</sub>H<sub>11</sub>] (**2**) in CDCl<sub>3</sub>.

Figure S2. <sup>11</sup>B NMR spectrum of [9-Et(Me)S-*nido*-7,8-C<sub>2</sub>B<sub>9</sub>H<sub>11</sub>] (**2**) in CDCl<sub>3</sub>.

Figure S3. <sup>1</sup>H NMR spectrum of [9-Pr(Me)S-*nido*-7,8-C<sub>2</sub>B<sub>9</sub>H<sub>11</sub>] (**3**) in CDCl<sub>3</sub>.

Figure S4. <sup>11</sup>B{<sup>1</sup>H} NMR spectrum of [9-Pr(Me)S-*nido*-7,8-C<sub>2</sub>B<sub>9</sub>H<sub>11</sub>] (**3**) in CDCl<sub>3</sub>.

Figure S5. <sup>11</sup>B NMR spectrum of [9-Pr(Me)S-*nido*-7,8-C<sub>2</sub>B<sub>9</sub>H<sub>11</sub>] (**3**) in CDCl<sub>3</sub>.

Figure S6. <sup>1</sup>H NMR spectrum of [9-Bu(Me)S-*nido*-7,8-C<sub>2</sub>B<sub>9</sub>H<sub>11</sub>] (**4**) in CDCl<sub>3</sub>.

Figure S7. <sup>11</sup>B{<sup>1</sup>H} NMR spectrum of [9-Bu(Me)S-*nido*-7,8-C<sub>2</sub>B<sub>9</sub>H<sub>11</sub>] (**4**) in CDCl<sub>3</sub>.

Figure S8. <sup>11</sup>B NMR spectrum of [9-Bu(Me)S-*nido*-7,8-C<sub>2</sub>B<sub>9</sub>H<sub>11</sub>] (**4**) in CDCl<sub>3</sub>.

Figure S9. <sup>1</sup>H NMR spectrum of [9-Bn(Me)S-*nido*-7,8-C<sub>2</sub>B<sub>9</sub>H<sub>11</sub>] (**5**) in CDCl<sub>3</sub>.

Figure S10. <sup>13</sup>C NMR spectrum of [9-Bn(Me)S-*nido*-7,8-C<sub>2</sub>B<sub>9</sub>H<sub>11</sub>] (**5**) in CDCl<sub>3</sub>.

Figure S11. <sup>11</sup>B{<sup>1</sup>H} NMR spectrum of [9-Bn(Me)S-*nido*-7,8-C<sub>2</sub>B<sub>9</sub>H<sub>11</sub>] (**5**) in CDCl<sub>3</sub>.

Figure S12. <sup>11</sup>B NMR spectrum of [9-Bn(Me)S-*nido*-7,8-C<sub>2</sub>B<sub>9</sub>H<sub>11</sub>] (**5**) in CDCl<sub>3</sub>.

Figure S13. <sup>1</sup>H NMR spectrum of [9-BrCH<sub>2</sub>CH<sub>2</sub>(Me)S-*nido*-7,8-C<sub>2</sub>B<sub>9</sub>H<sub>11</sub>] (**6**) in CDCl<sub>3</sub>.

Figure S14. <sup>11</sup>B{<sup>1</sup>H} NMR spectrum of [9-BrCH<sub>2</sub>CH<sub>2</sub>(Me)S-*nido*-7,8-C<sub>2</sub>B<sub>9</sub>H<sub>11</sub>] (**6**) in CDCl<sub>3</sub>.

Figure S15.  $^{11}\text{B}$  NMR spectrum of [9-BrCH<sub>2</sub>CH<sub>2</sub>(Me)S-*nido*-7,8-C<sub>2</sub>B<sub>9</sub>H<sub>11</sub>] (**6**) in CDCl<sub>3</sub>.

Figure S16.  $^1\text{H}$  NMR spectrum of [9-EtOCH<sub>2</sub>CH<sub>2</sub>(Me)S-*nido*-7,8-C<sub>2</sub>B<sub>9</sub>H<sub>11</sub>] (**7**) in CDCl<sub>3</sub>.

Figure S17.  $^{11}\text{B}\{^1\text{H}\}$  NMR spectrum of [9-EtOrCH<sub>2</sub>CH<sub>2</sub>(Me)S-*nido*-7,8-C<sub>2</sub>B<sub>9</sub>H<sub>11</sub>] (**7**) in CDCl<sub>3</sub>.

Figure S18.  $^{11}\text{B}$  NMR spectrum of [9-EtOCH<sub>2</sub>CH<sub>2</sub>(Me)S-*nido*-7,8-C<sub>2</sub>B<sub>9</sub>H<sub>11</sub>] (**7**) in CDCl<sub>3</sub>.

Figure S19.  $^1\text{H}$  NMR spectrum of [9-H<sub>2</sub>C=CH(Me)S-*nido*-7,8-C<sub>2</sub>B<sub>9</sub>H<sub>11</sub>] (**8**) in CDCl<sub>3</sub>.

Figure S20.  $^{13}\text{C}$  NMR spectrum of [9-H<sub>2</sub>C=CH(Me)S-*nido*-7,8-C<sub>2</sub>B<sub>9</sub>H<sub>11</sub>] (**8**) in CDCl<sub>3</sub>.

Figure S21.  $^{11}\text{B}\{^1\text{H}\}$  NMR spectrum of [9-H<sub>2</sub>C=CH(Me)S-*nido*-7,8-C<sub>2</sub>B<sub>9</sub>H<sub>11</sub>] (**8**) in CDCl<sub>3</sub>.

Figure S22.  $^{11}\text{B}$  NMR spectrum of [9-H<sub>2</sub>C=CH(Me)S-*nido*-7,8-C<sub>2</sub>B<sub>9</sub>H<sub>11</sub>] (**8**) in CDCl<sub>3</sub>.

Figure S23.  $^1\text{H}$  NMR spectrum of [9-H<sub>2</sub>C=CHCH<sub>2</sub>(Me)S-*nido*-7,8-C<sub>2</sub>B<sub>9</sub>H<sub>11</sub>] (**9**) in CDCl<sub>3</sub>.

Figure S24.  $^{11}\text{B}\{^1\text{H}\}$  NMR spectrum of [9-H<sub>2</sub>C=CHCH<sub>2</sub>(Me)S-*nido*-7,8-C<sub>2</sub>B<sub>9</sub>H<sub>11</sub>] (**9**) in CDCl<sub>3</sub>.

Figure S25.  $^{11}\text{B}$  NMR spectrum of [9-H<sub>2</sub>C=CHCH<sub>2</sub>(Me)S-*nido*-7,8-C<sub>2</sub>B<sub>9</sub>H<sub>11</sub>] (**9**) in CDCl<sub>3</sub>.

Figure S26.  $^1\text{H}$  NMR spectrum of [9-HC≡C(Me)S-*nido*-7,8-C<sub>2</sub>B<sub>9</sub>H<sub>11</sub>] (**10**) in CDCl<sub>3</sub>.

Figure S27.  $^{13}\text{C}$  NMR spectrum of [9-HC≡C(Me)S-*nido*-7,8-C<sub>2</sub>B<sub>9</sub>H<sub>11</sub>] (**10**) in CDCl<sub>3</sub>.

Figure S28.  $^{11}\text{B}\{^1\text{H}\}$  NMR spectrum of [9-HC≡C(Me)S-*nido*-7,8-C<sub>2</sub>B<sub>9</sub>H<sub>11</sub>] (**10**) in CDCl<sub>3</sub>.

Figure S29.  $^{11}\text{B}$  NMR spectrum of [9-HC≡C(Me)S-*nido*-7,8-C<sub>2</sub>B<sub>9</sub>H<sub>11</sub>] (**10**) in CDCl<sub>3</sub>.

Figure S30.  $^1\text{H}$  NMR spectrum of [9-H<sub>2</sub>C=C=CH(Me)S-*nido*-7,8-C<sub>2</sub>B<sub>9</sub>H<sub>11</sub>] (**11**) in CDCl<sub>3</sub>.

Figure S31.  $^{13}\text{C}$  NMR spectrum of [9-H<sub>2</sub>C=C=CH(Me)S-*nido*-7,8-C<sub>2</sub>B<sub>9</sub>H<sub>11</sub>] (**11**) in CDCl<sub>3</sub>.

Figure S32.  $^{11}\text{B}\{^1\text{H}\}$  NMR spectrum of [9-H<sub>2</sub>C=C=CH(Me)S-*nido*-7,8-C<sub>2</sub>B<sub>9</sub>H<sub>11</sub>] (**11**) in CDCl<sub>3</sub>.

Figure S33.  $^{11}\text{B}$  NMR spectrum of [9-H<sub>2</sub>C=C=CH(Me)S-*nido*-7,8-C<sub>2</sub>B<sub>9</sub>H<sub>11</sub>] (**11**) in CDCl<sub>3</sub>.

Table S1. Bond lengths distribution in [9-RMeS-*nido*-7,8-C<sub>2</sub>B<sub>9</sub>H<sub>11</sub>] derivatives in comparison with [*nido*-7,8-C<sub>2</sub>B<sub>9</sub>H<sub>12</sub>]<sup>-</sup> anion.

siv11172.11  
F19CPD

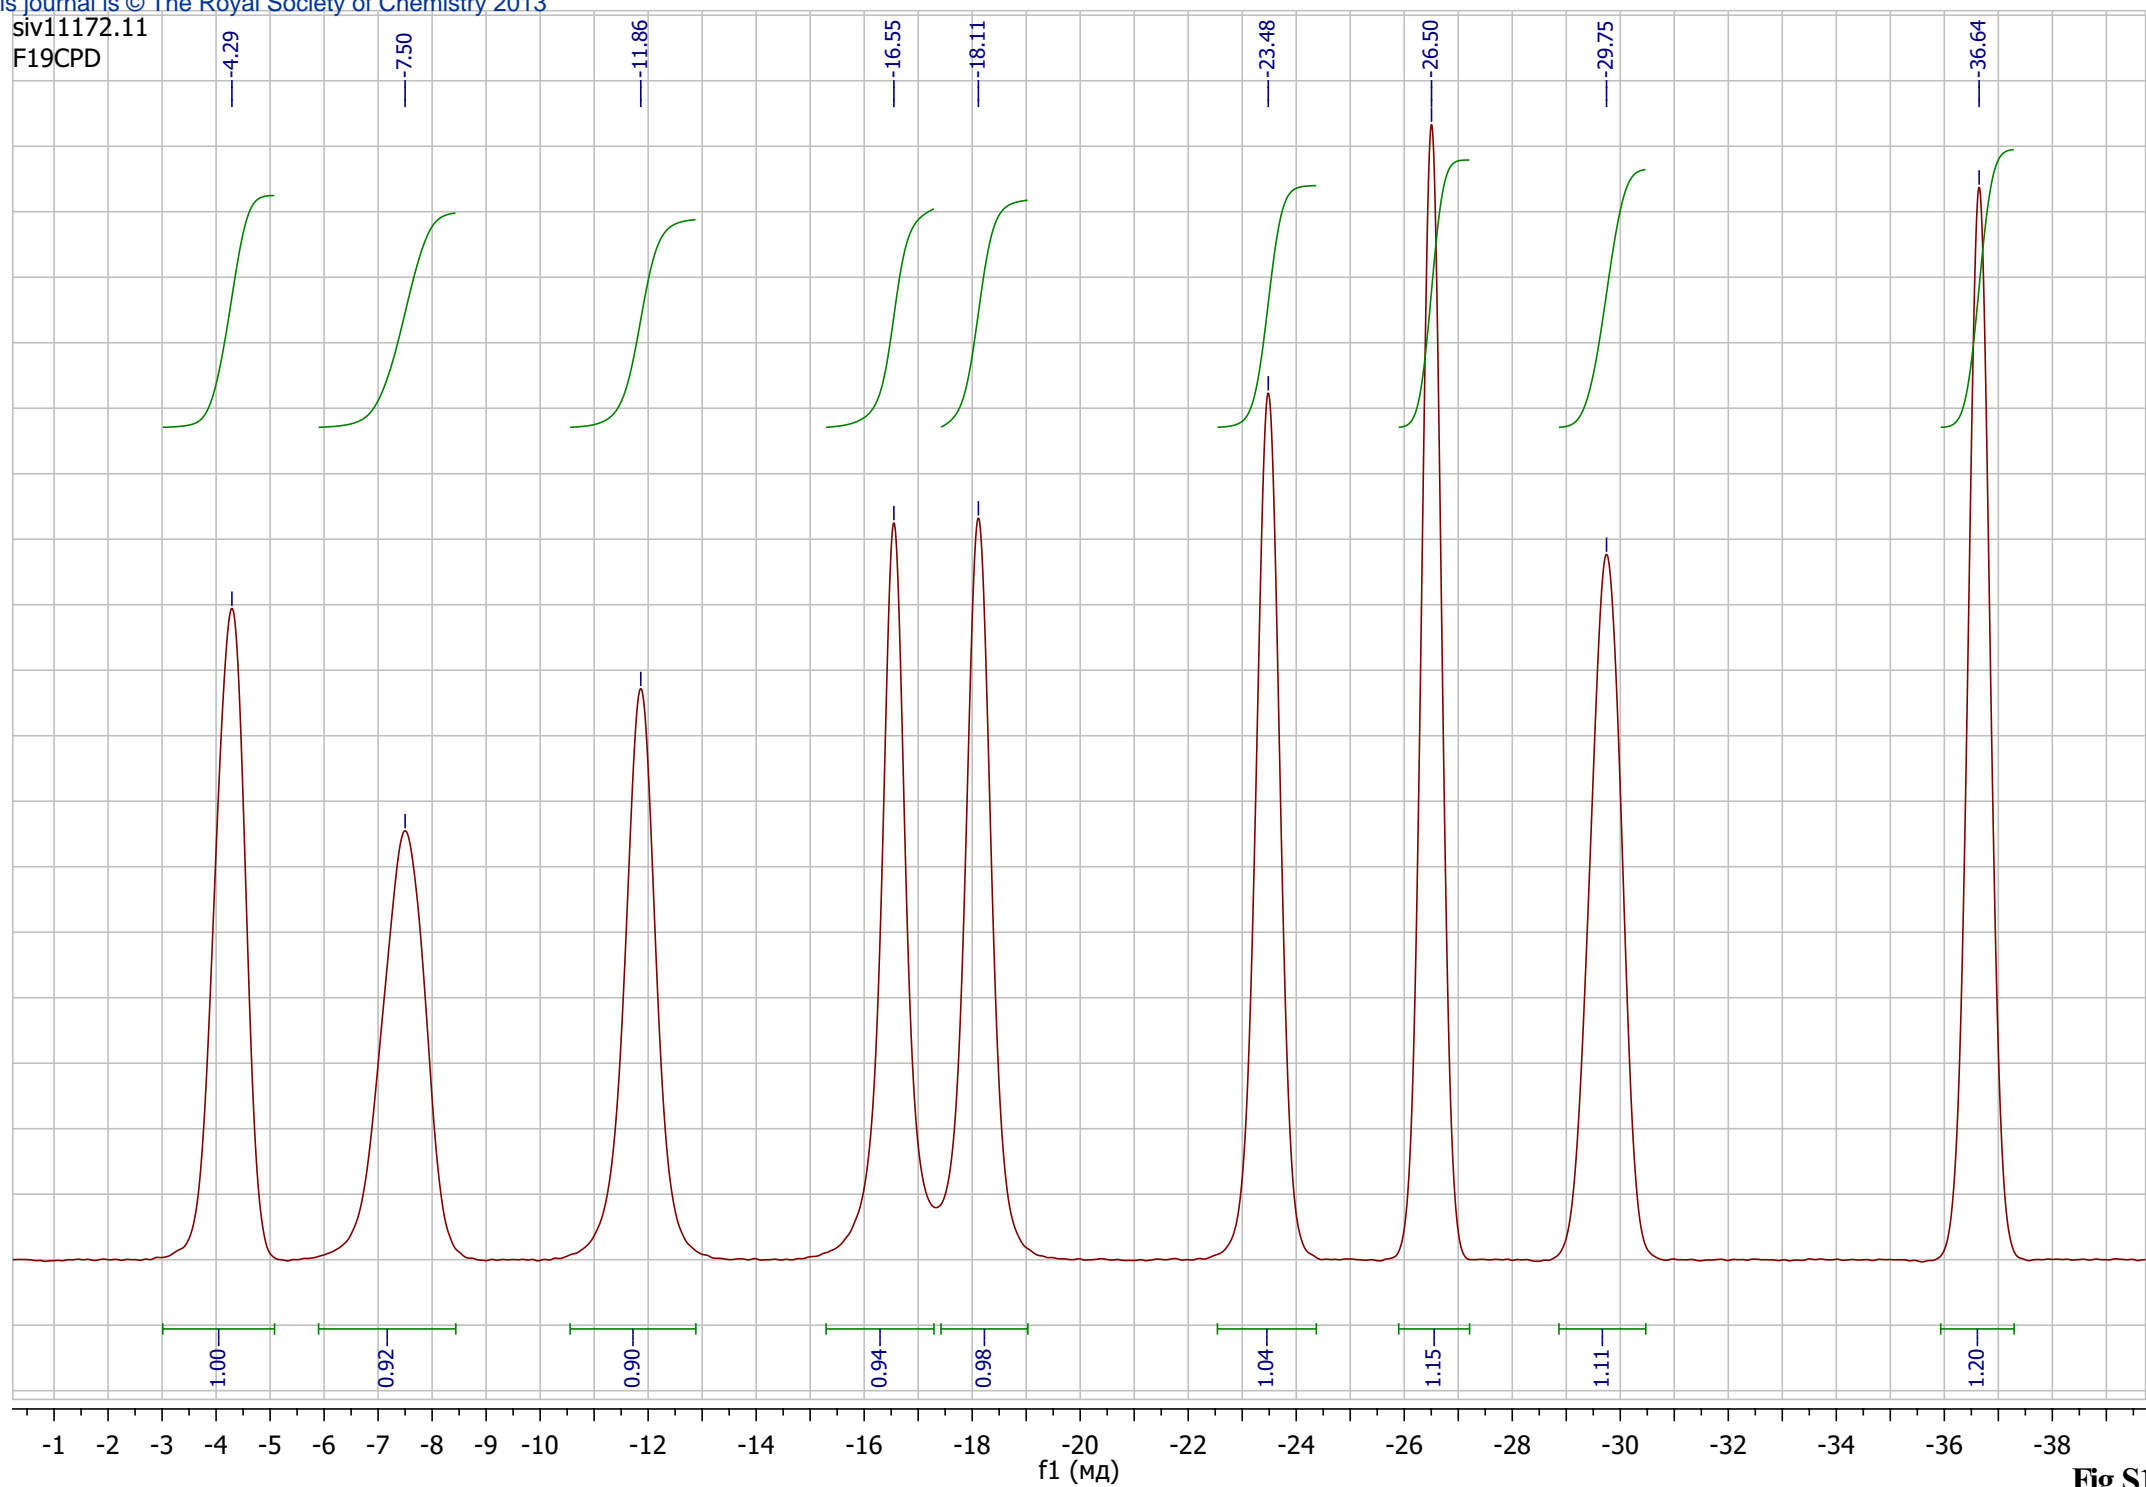

Fig S1

siv11172.11  
F19CPD

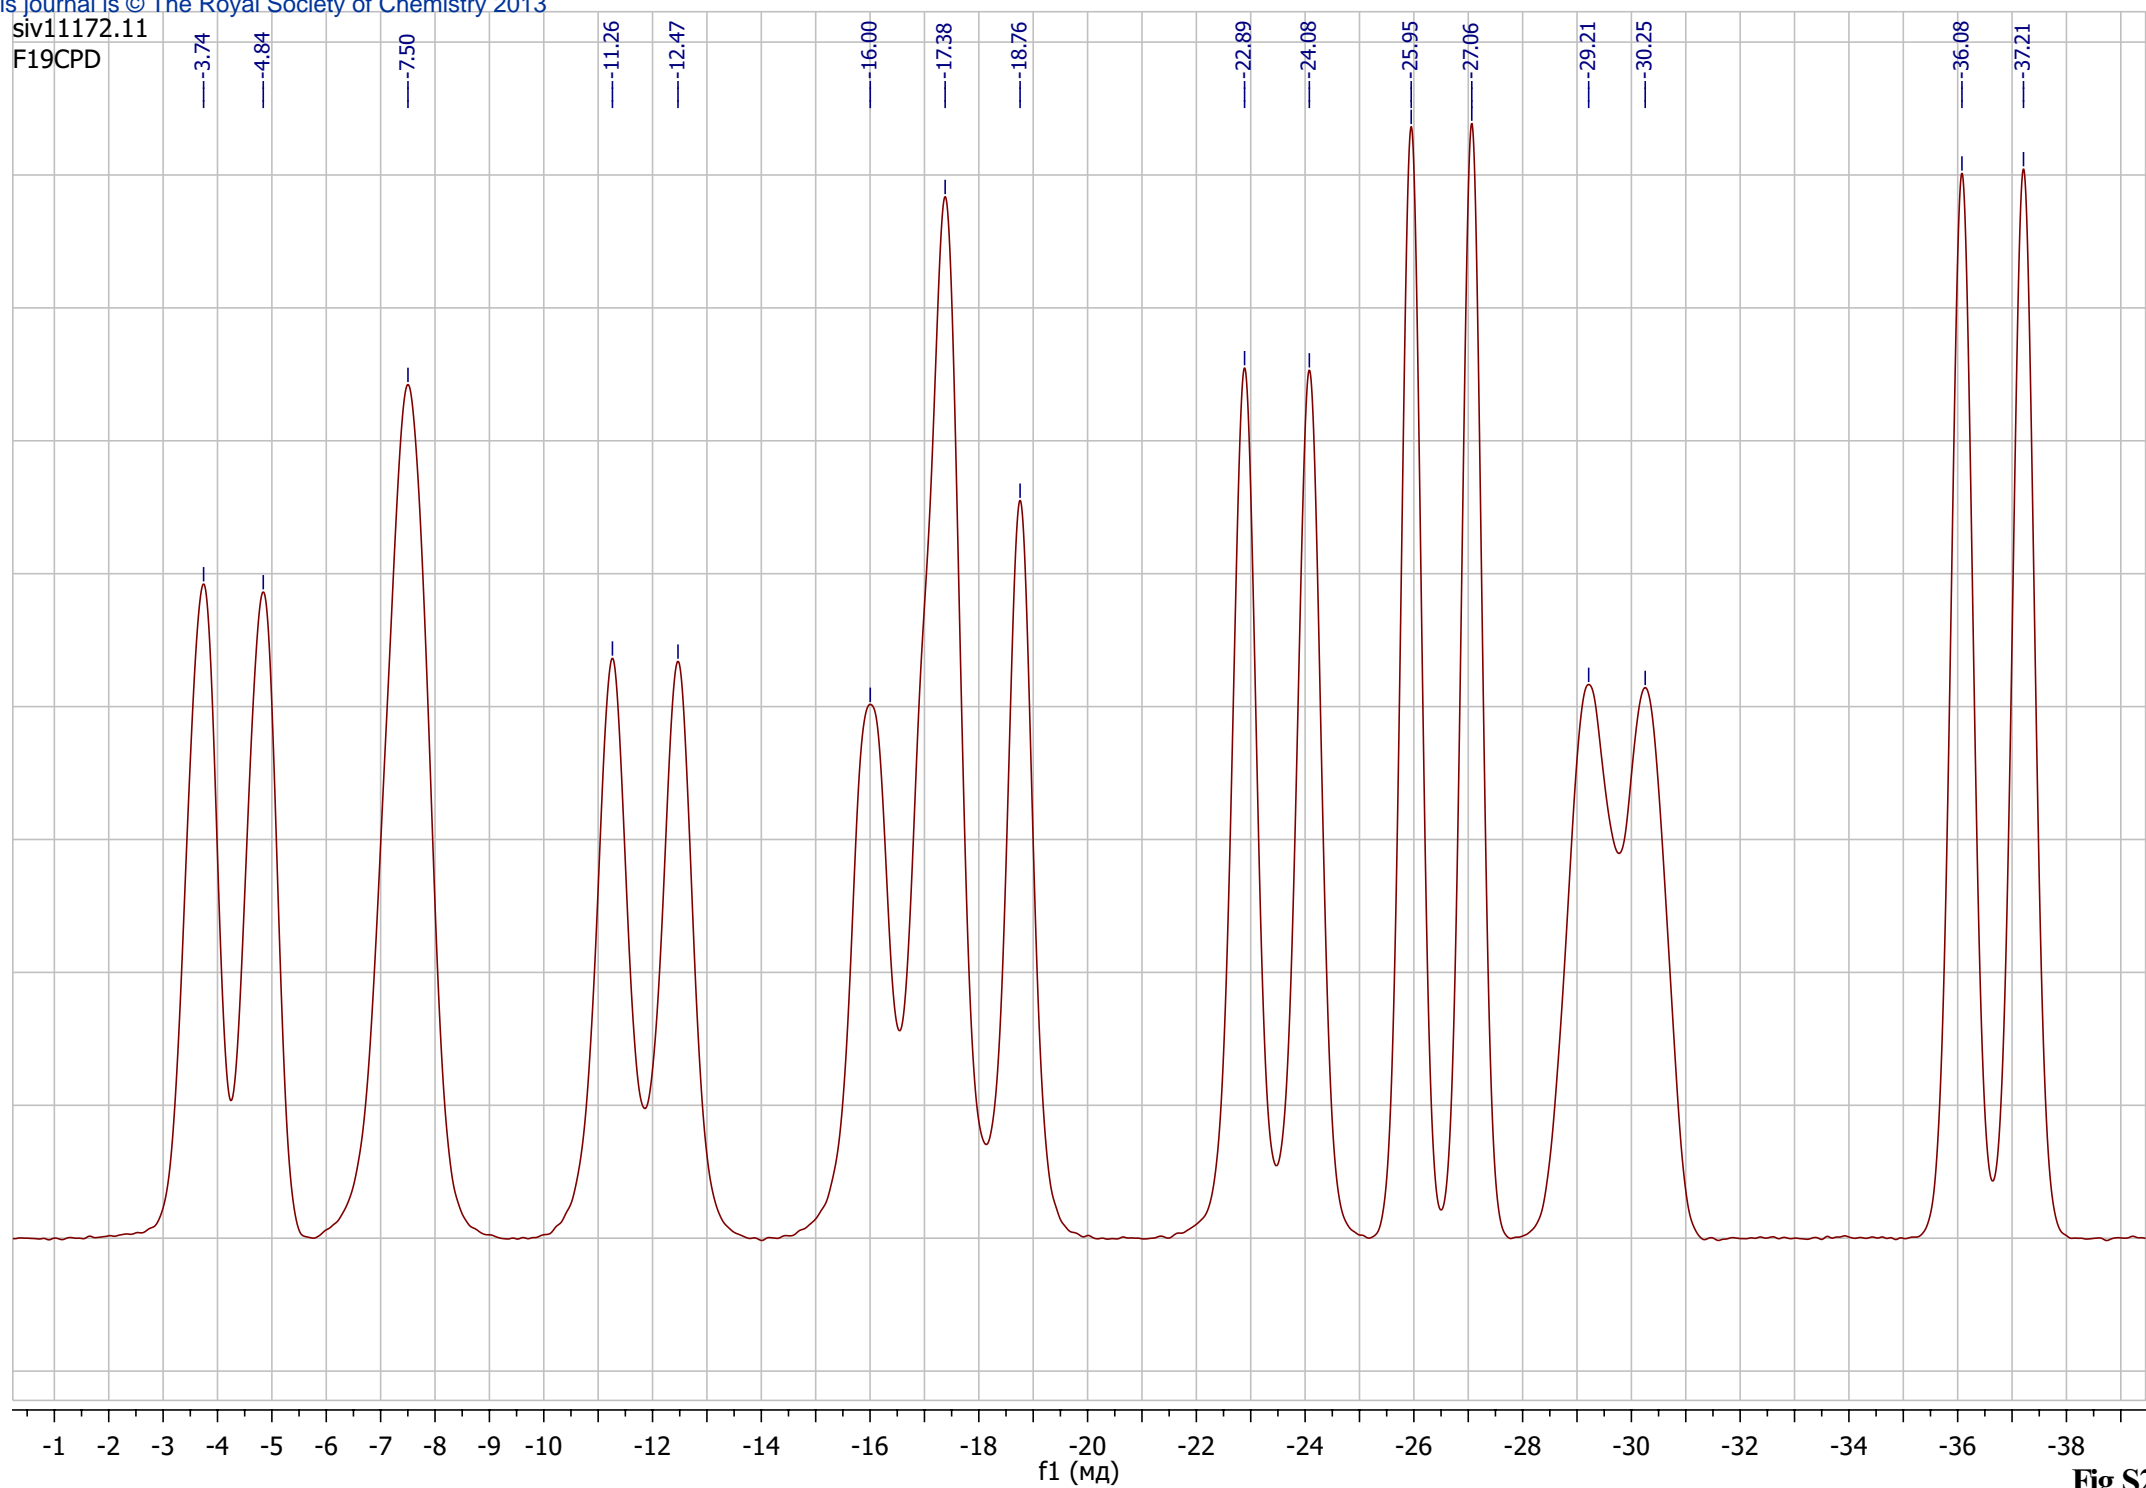

Fig S2

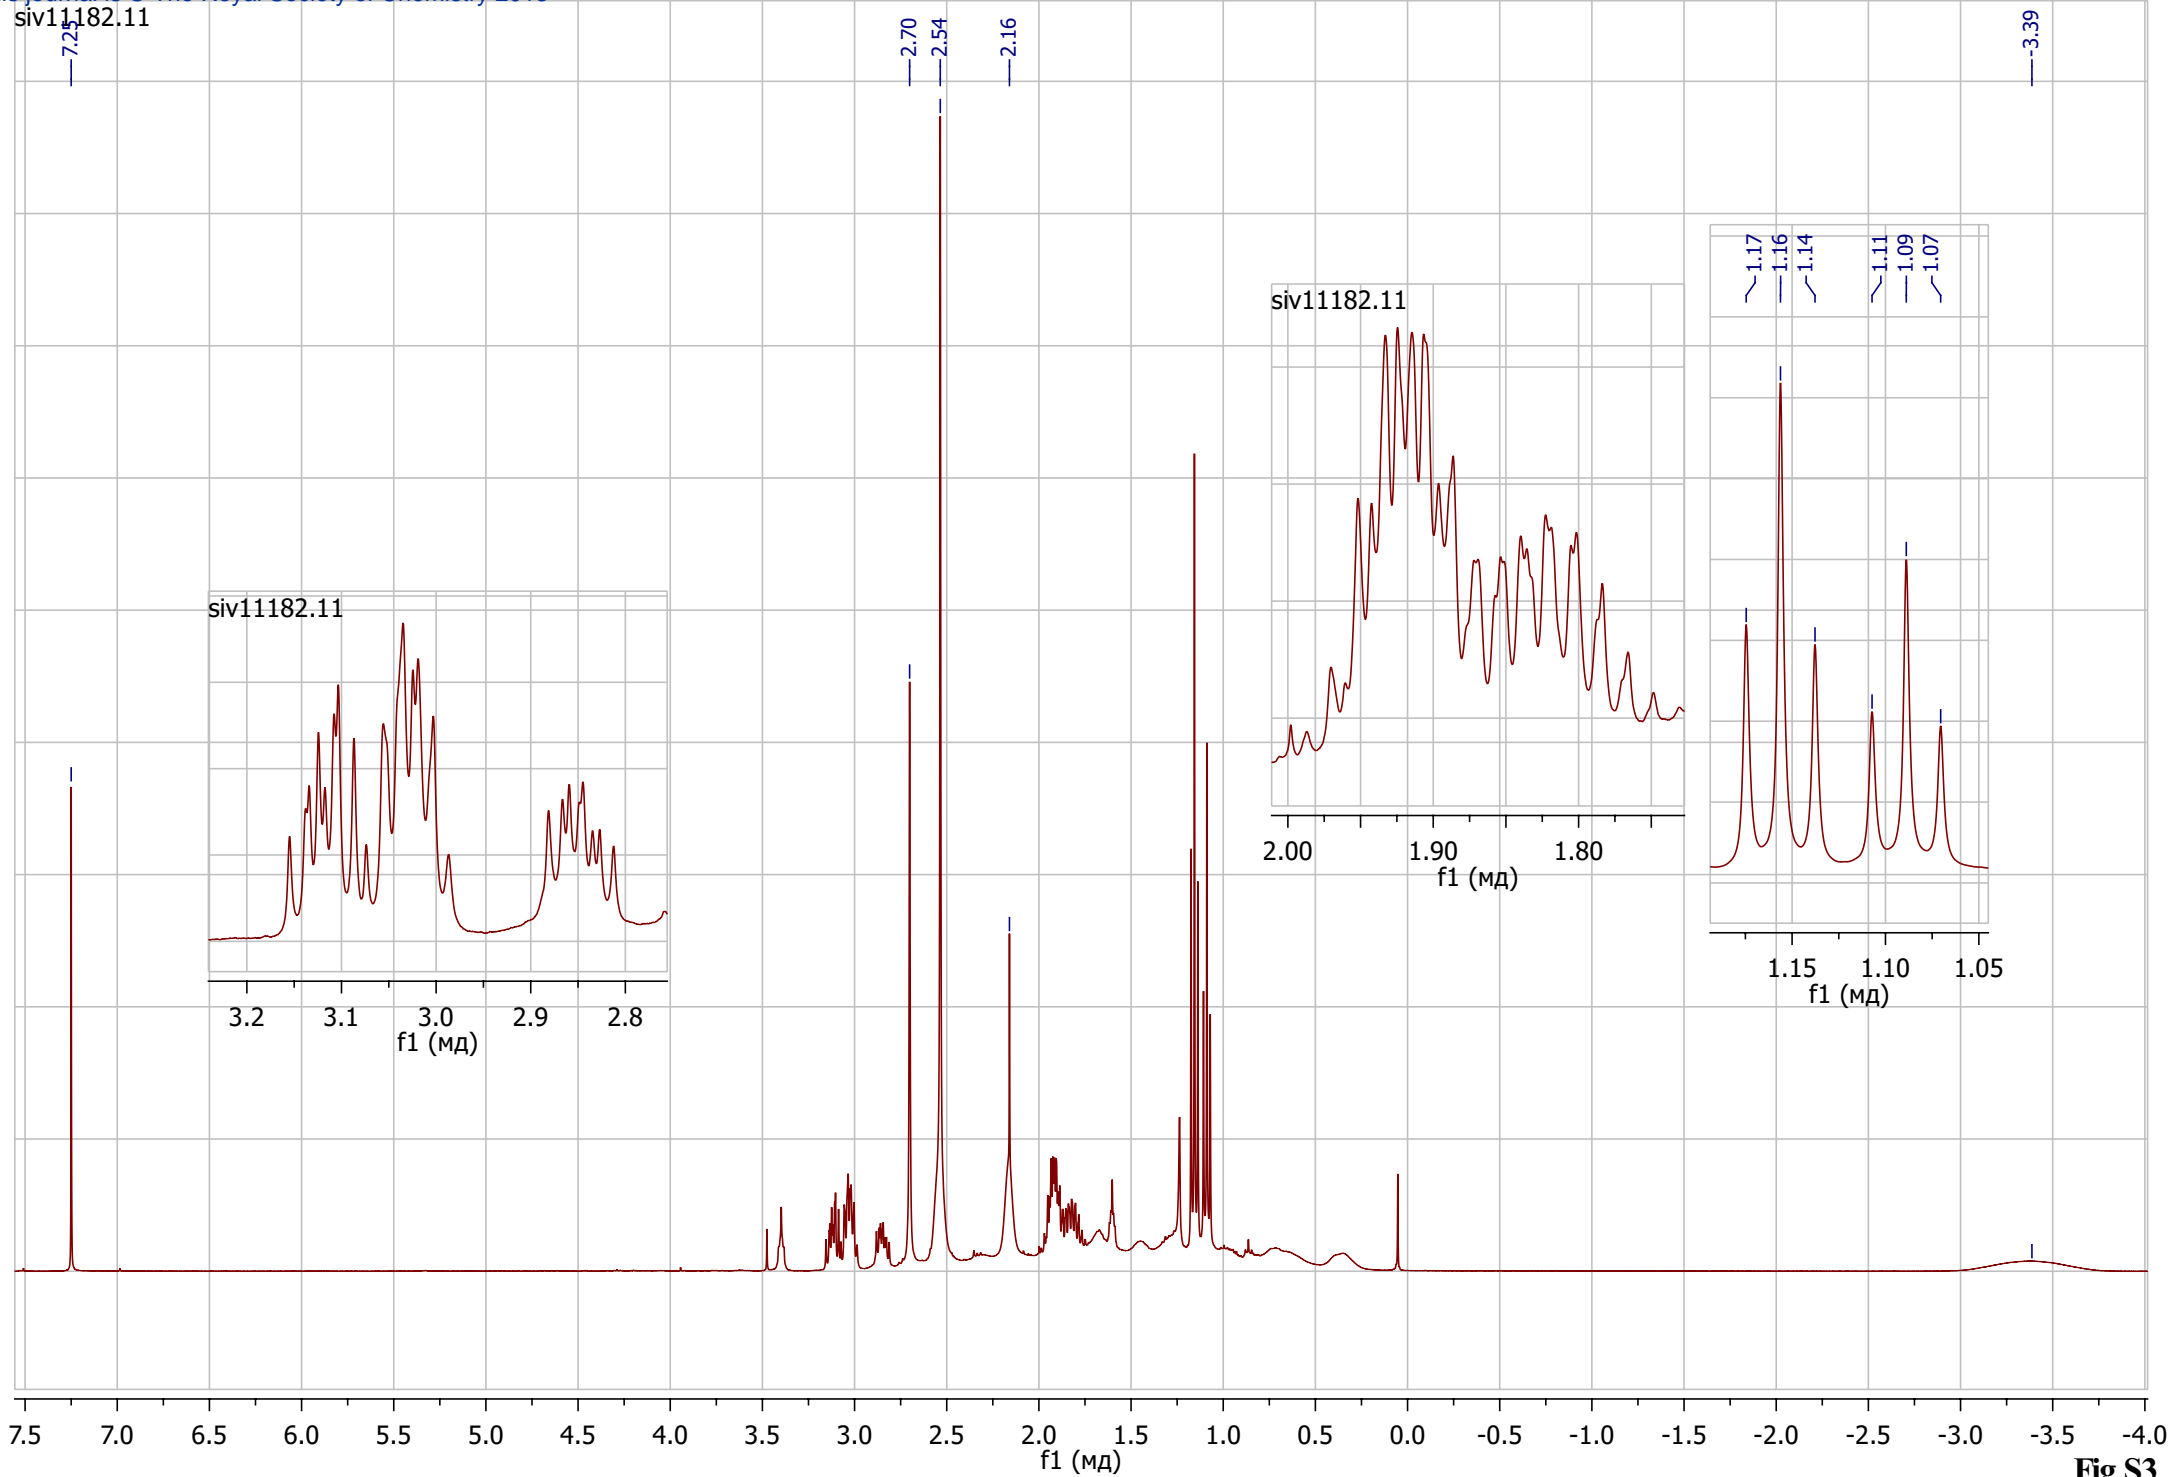

Fig S3

siv11182.11  
F19CPD

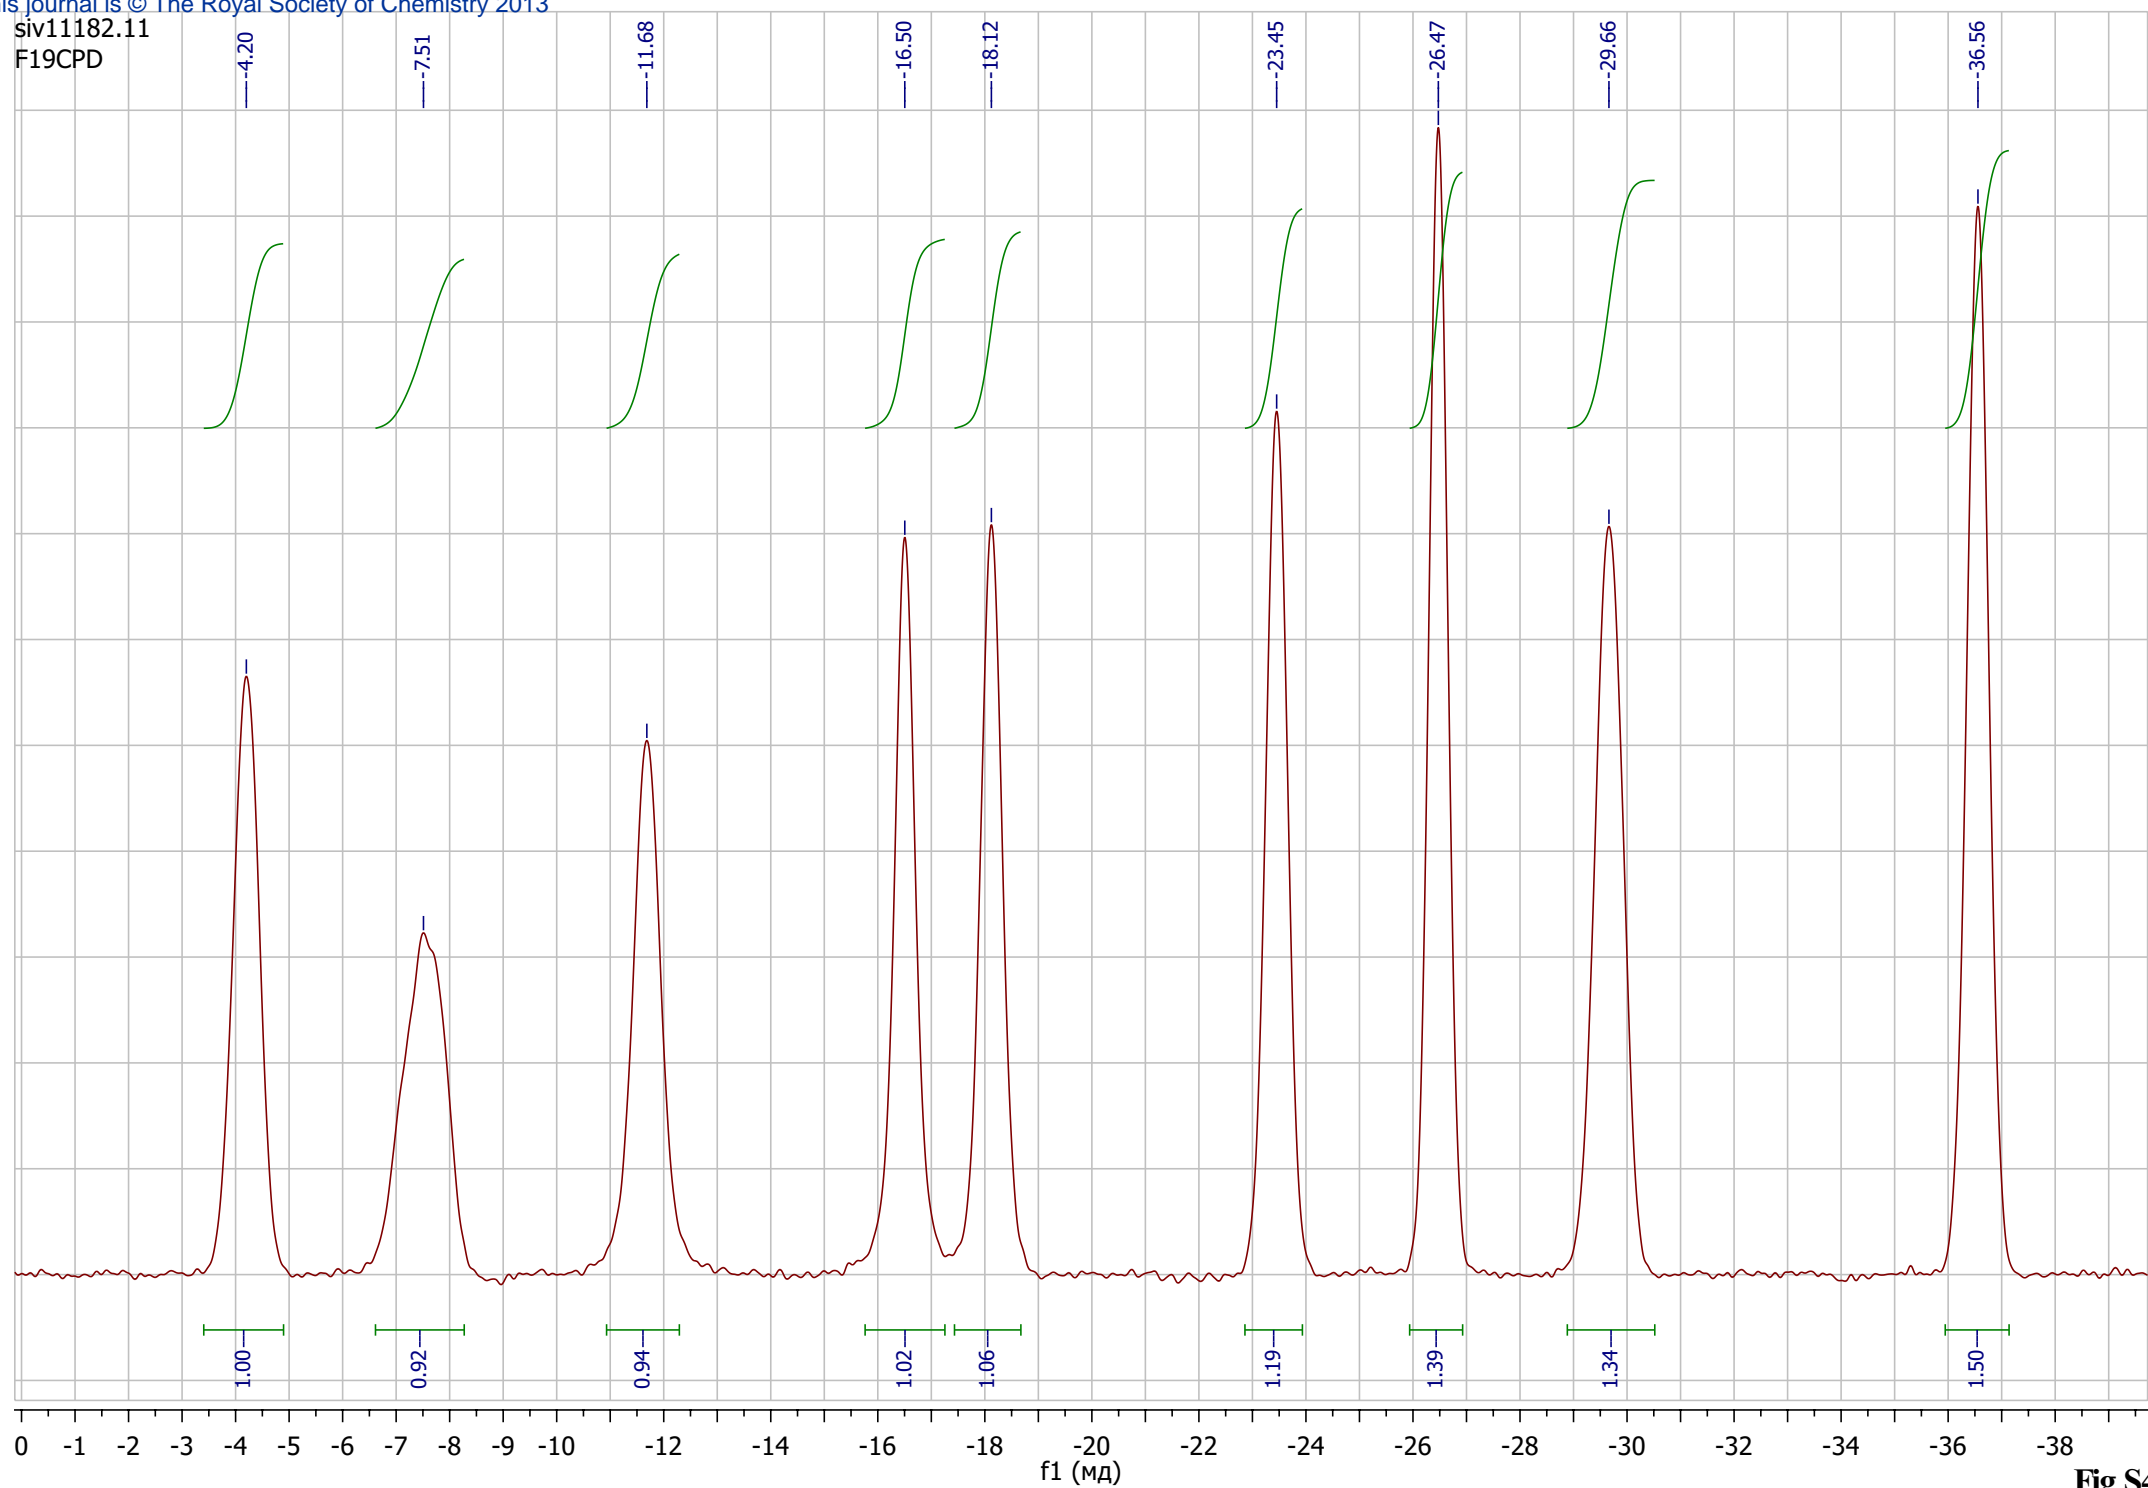

Fig S4

siv11182.11  
F19CPD

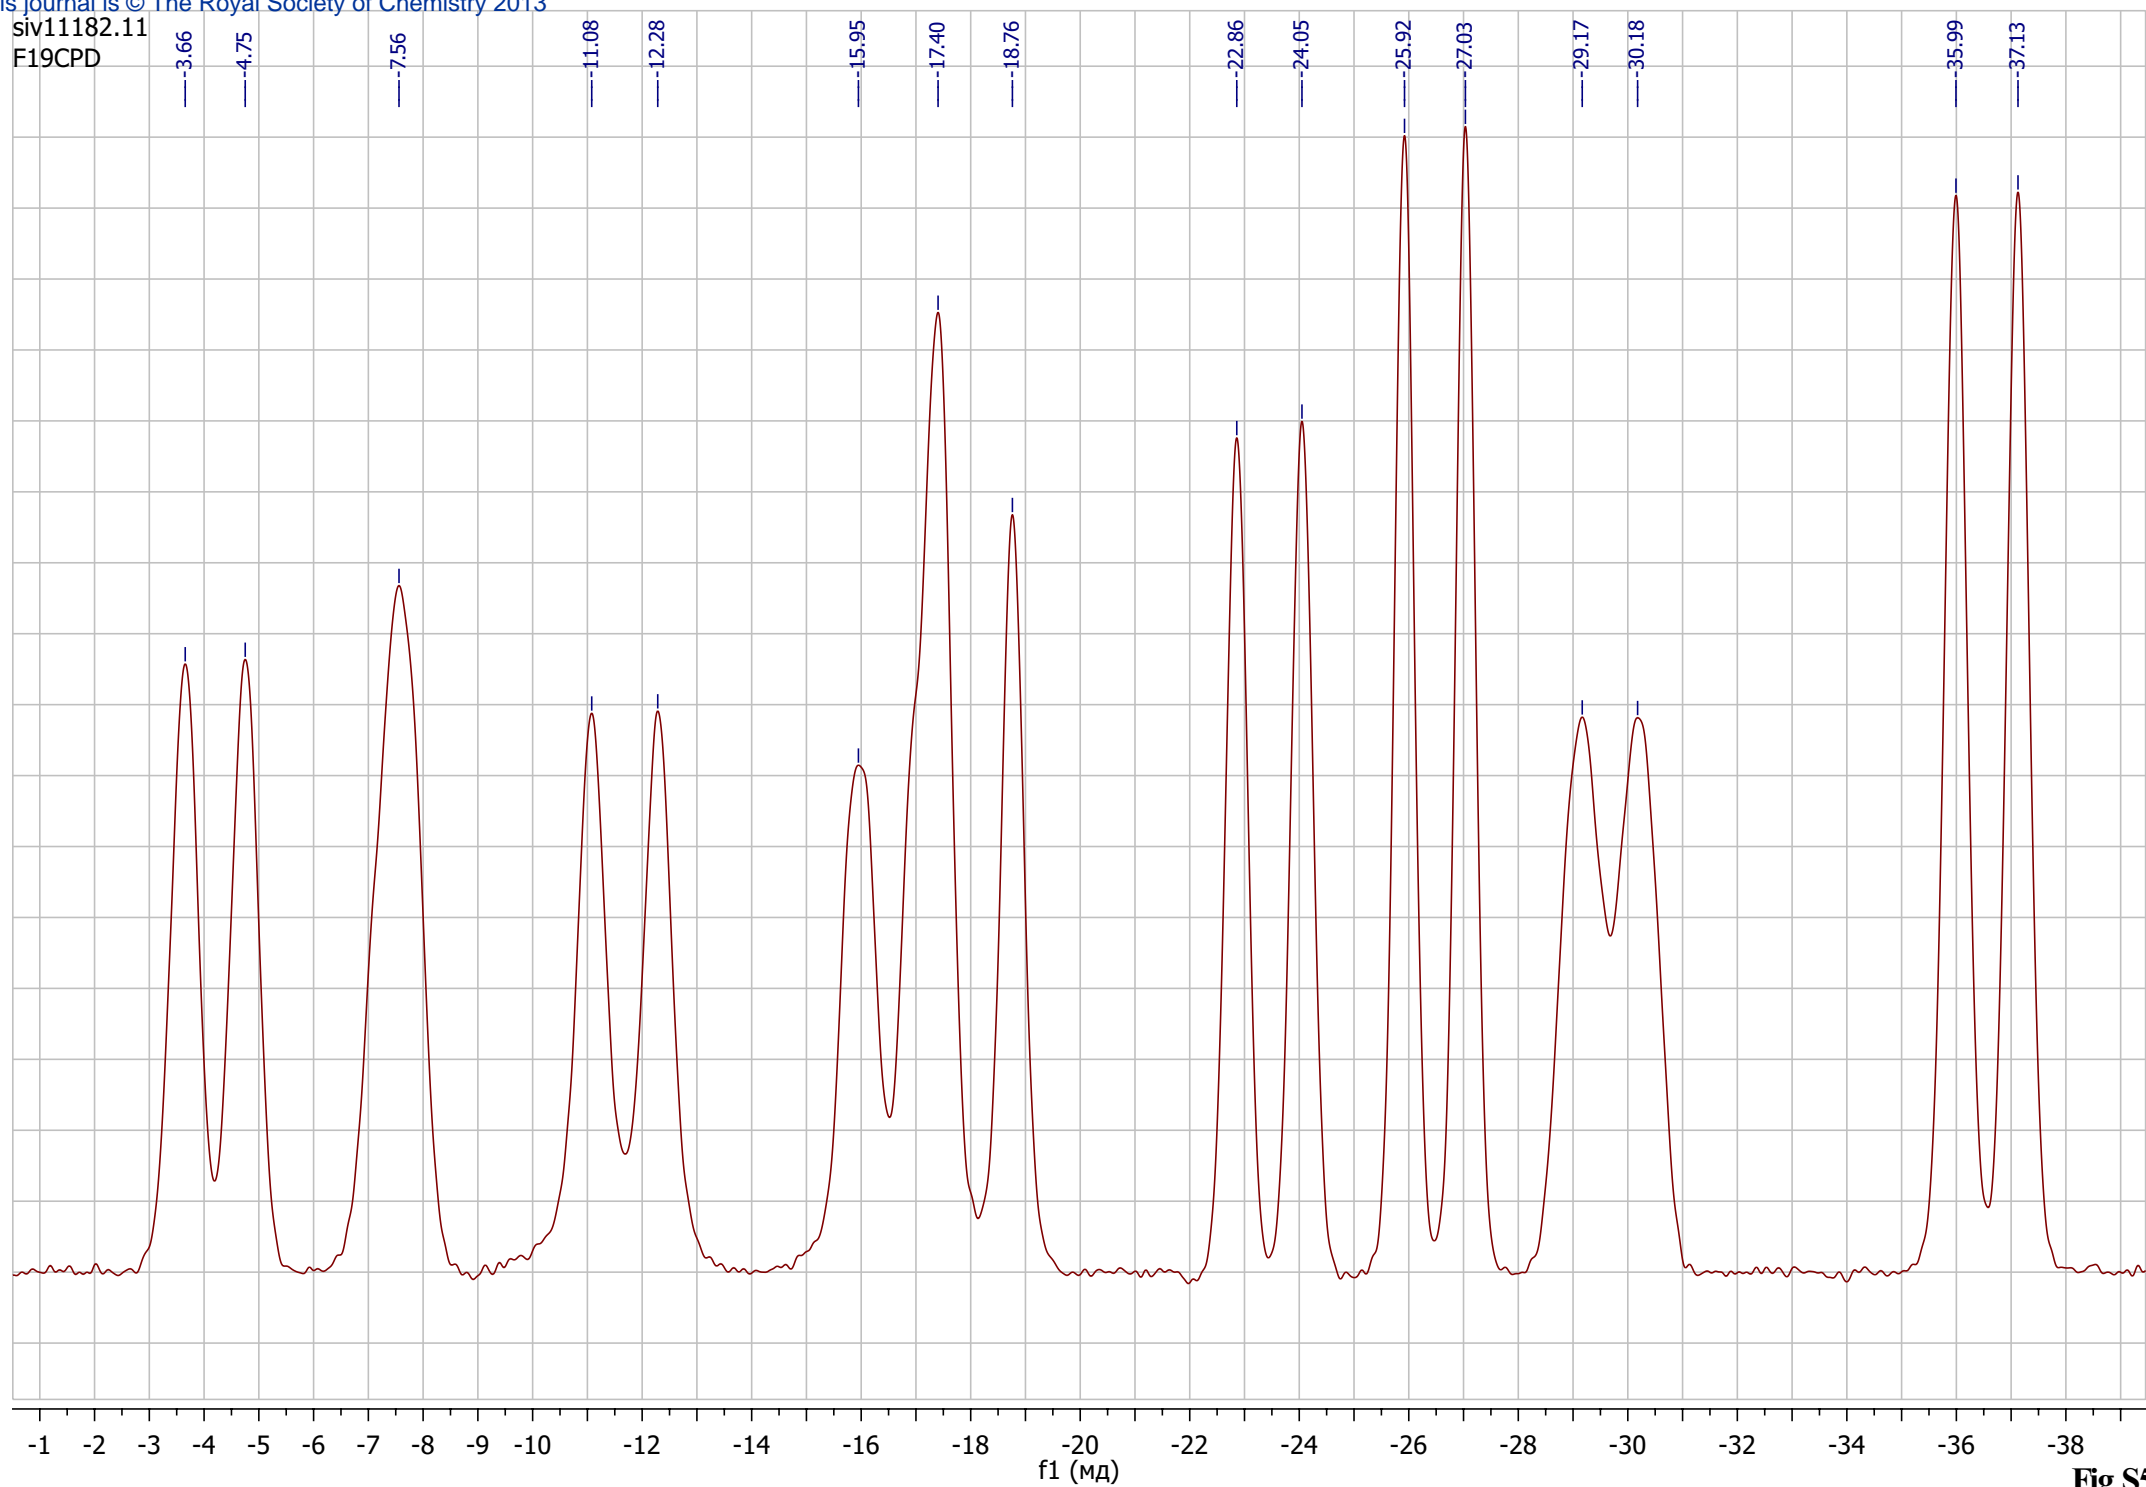

Fig S5

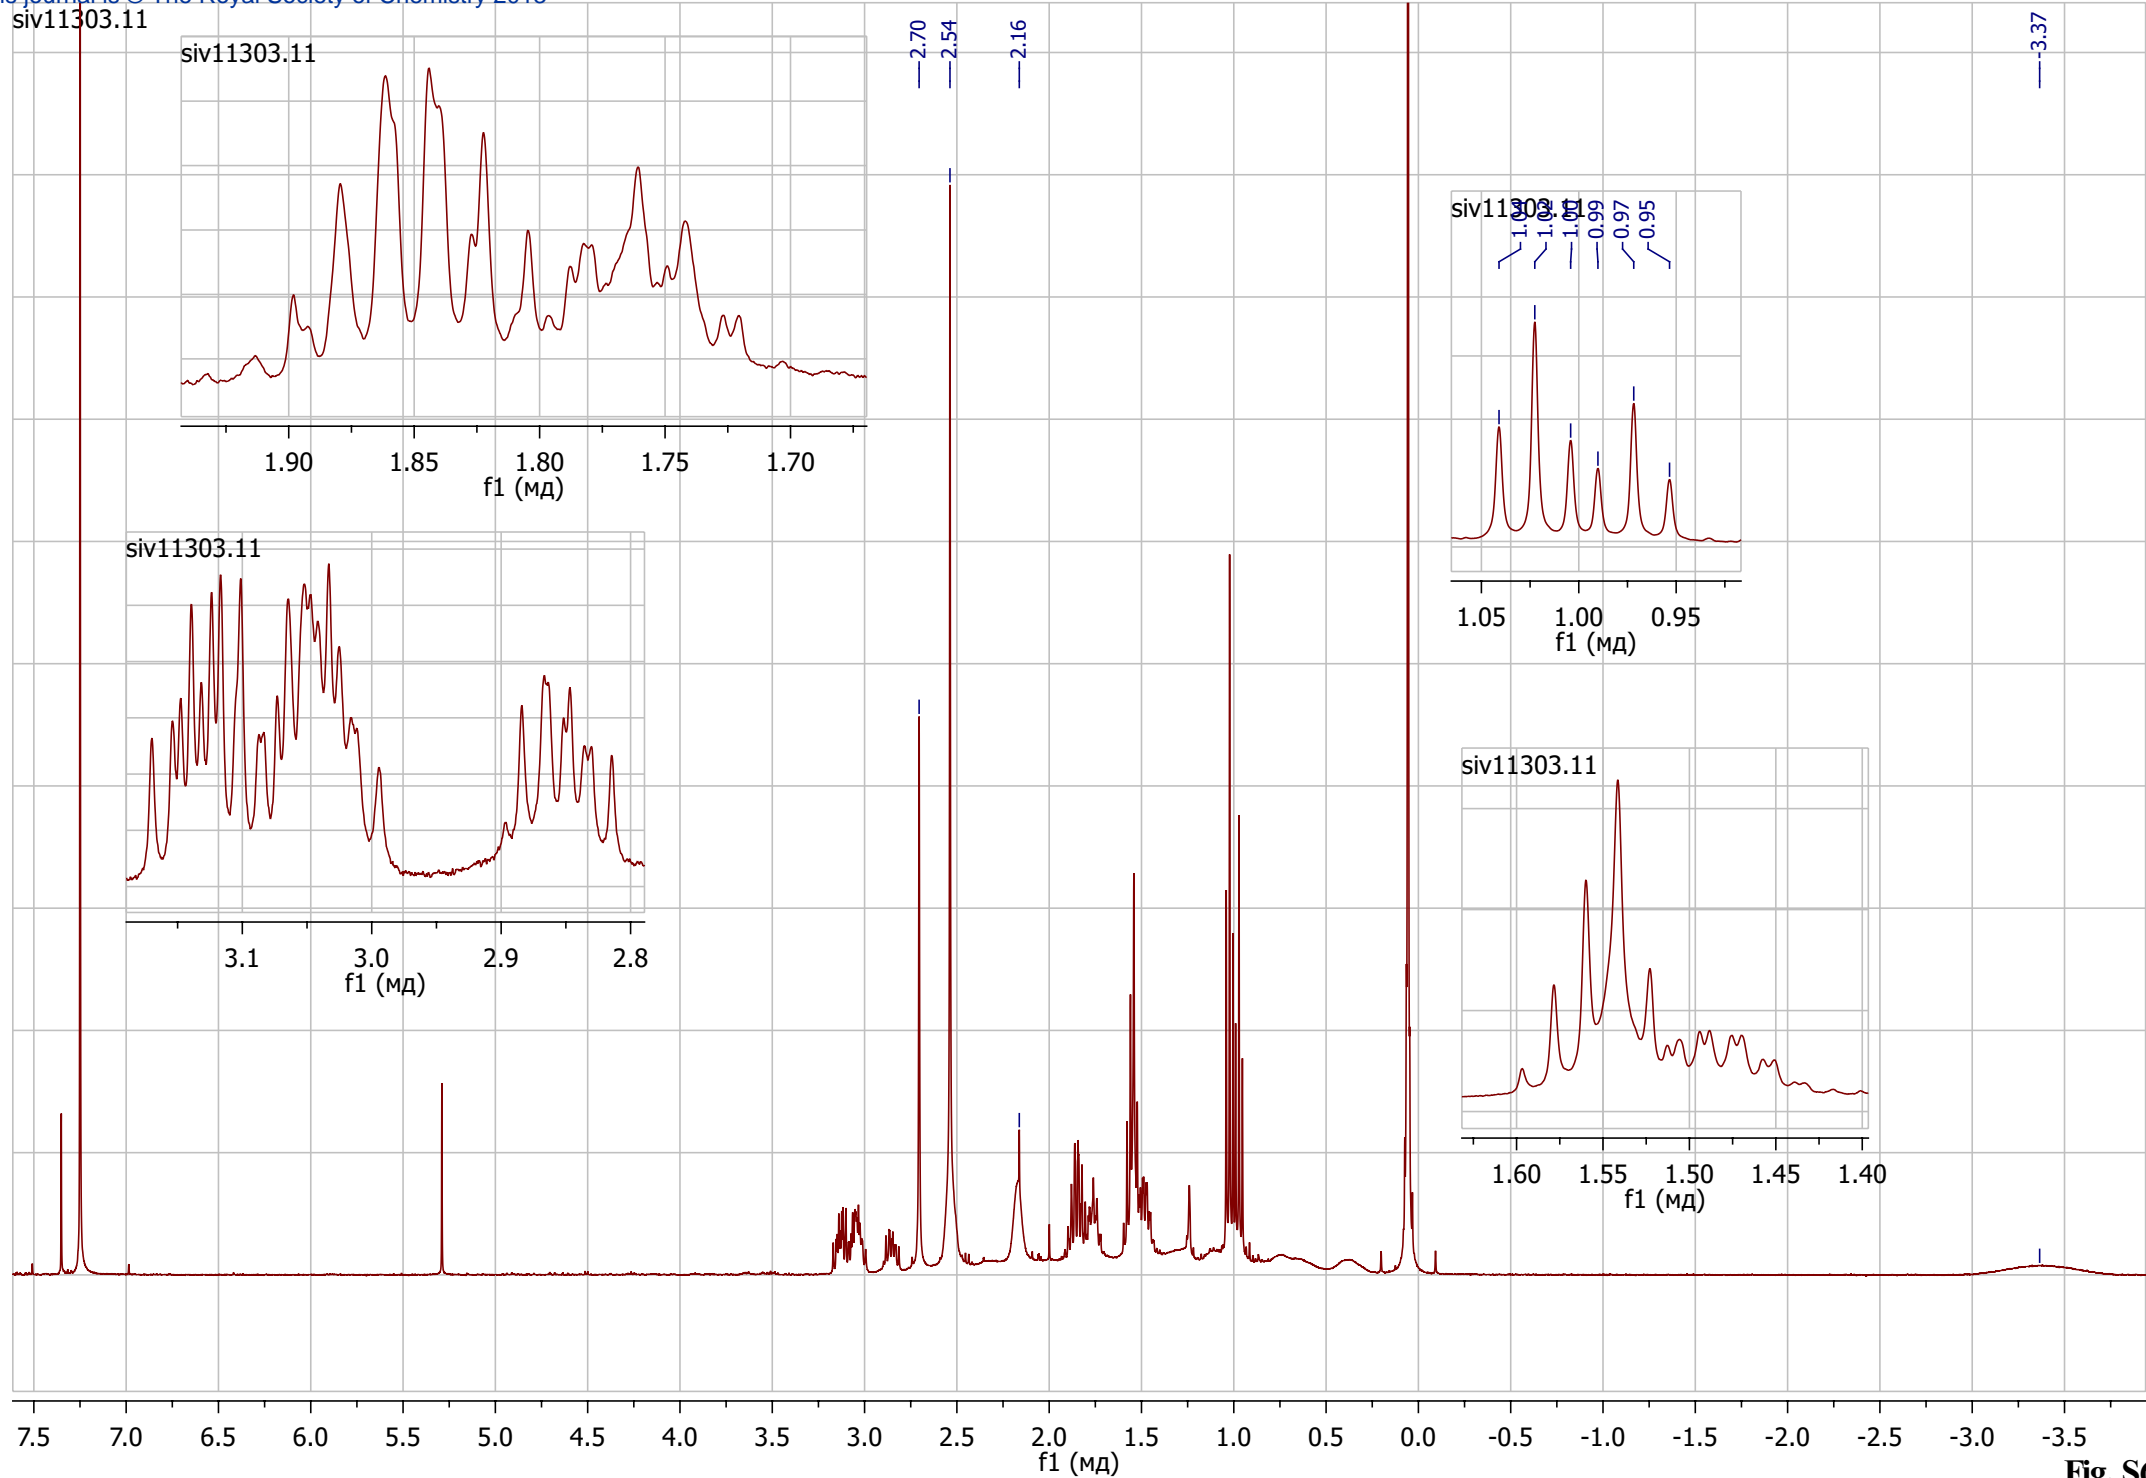

Fig. S6



siv11303.11  
F19CPD

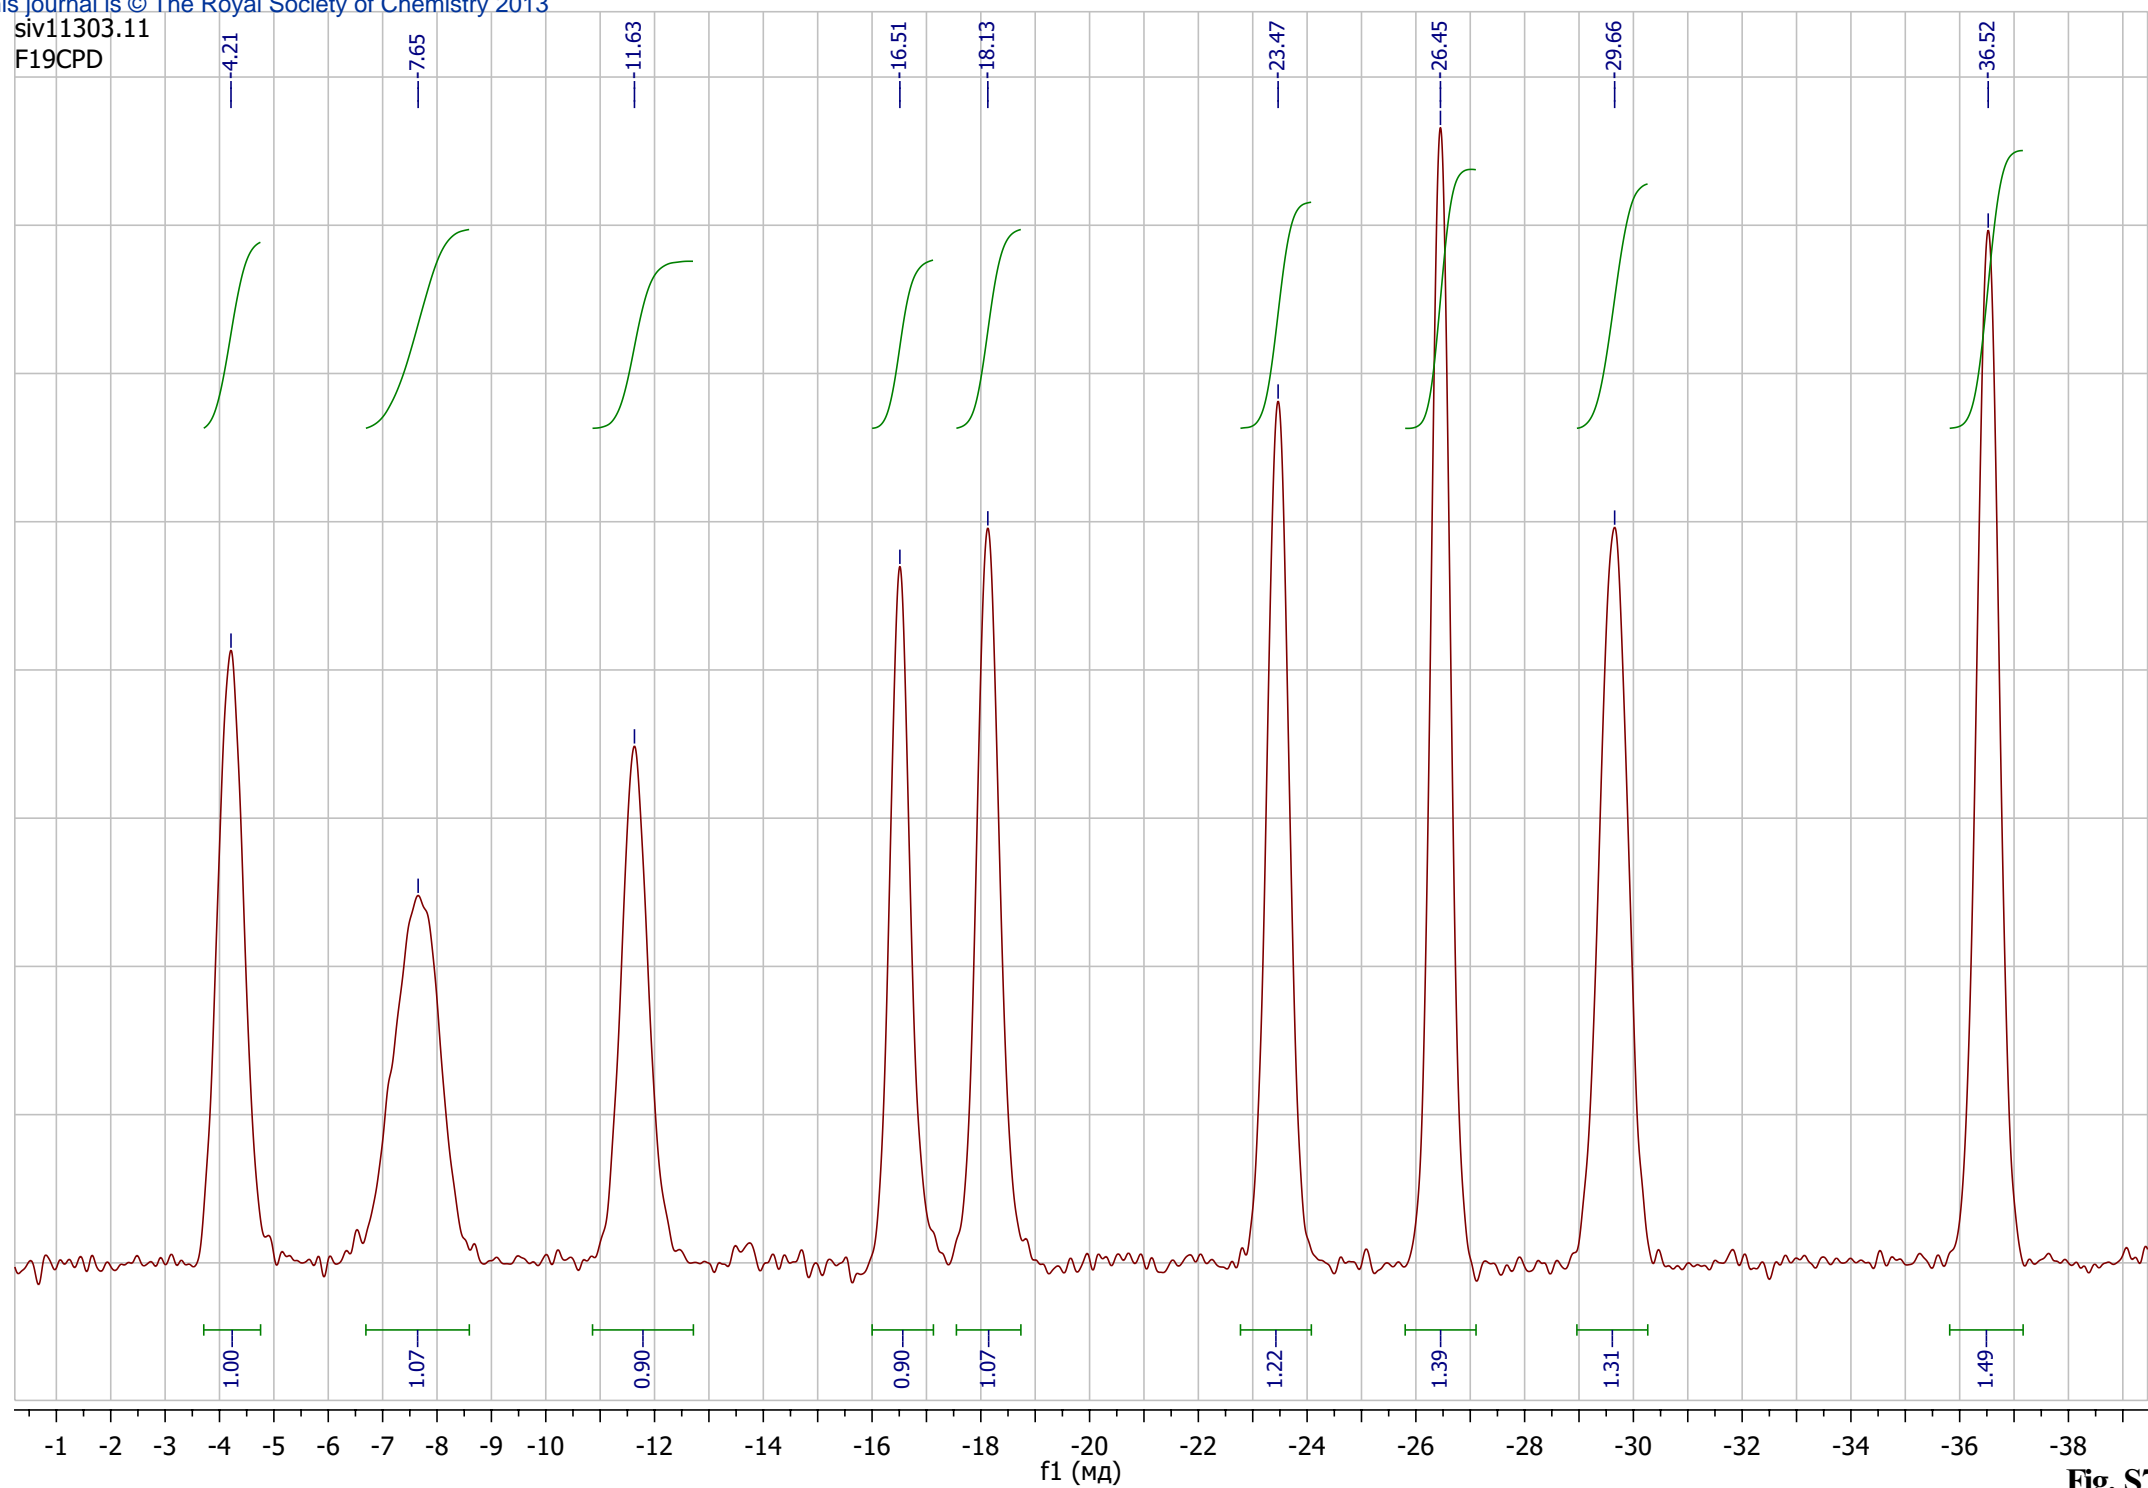

Fig. S7

siv11303.11  
F19CPD

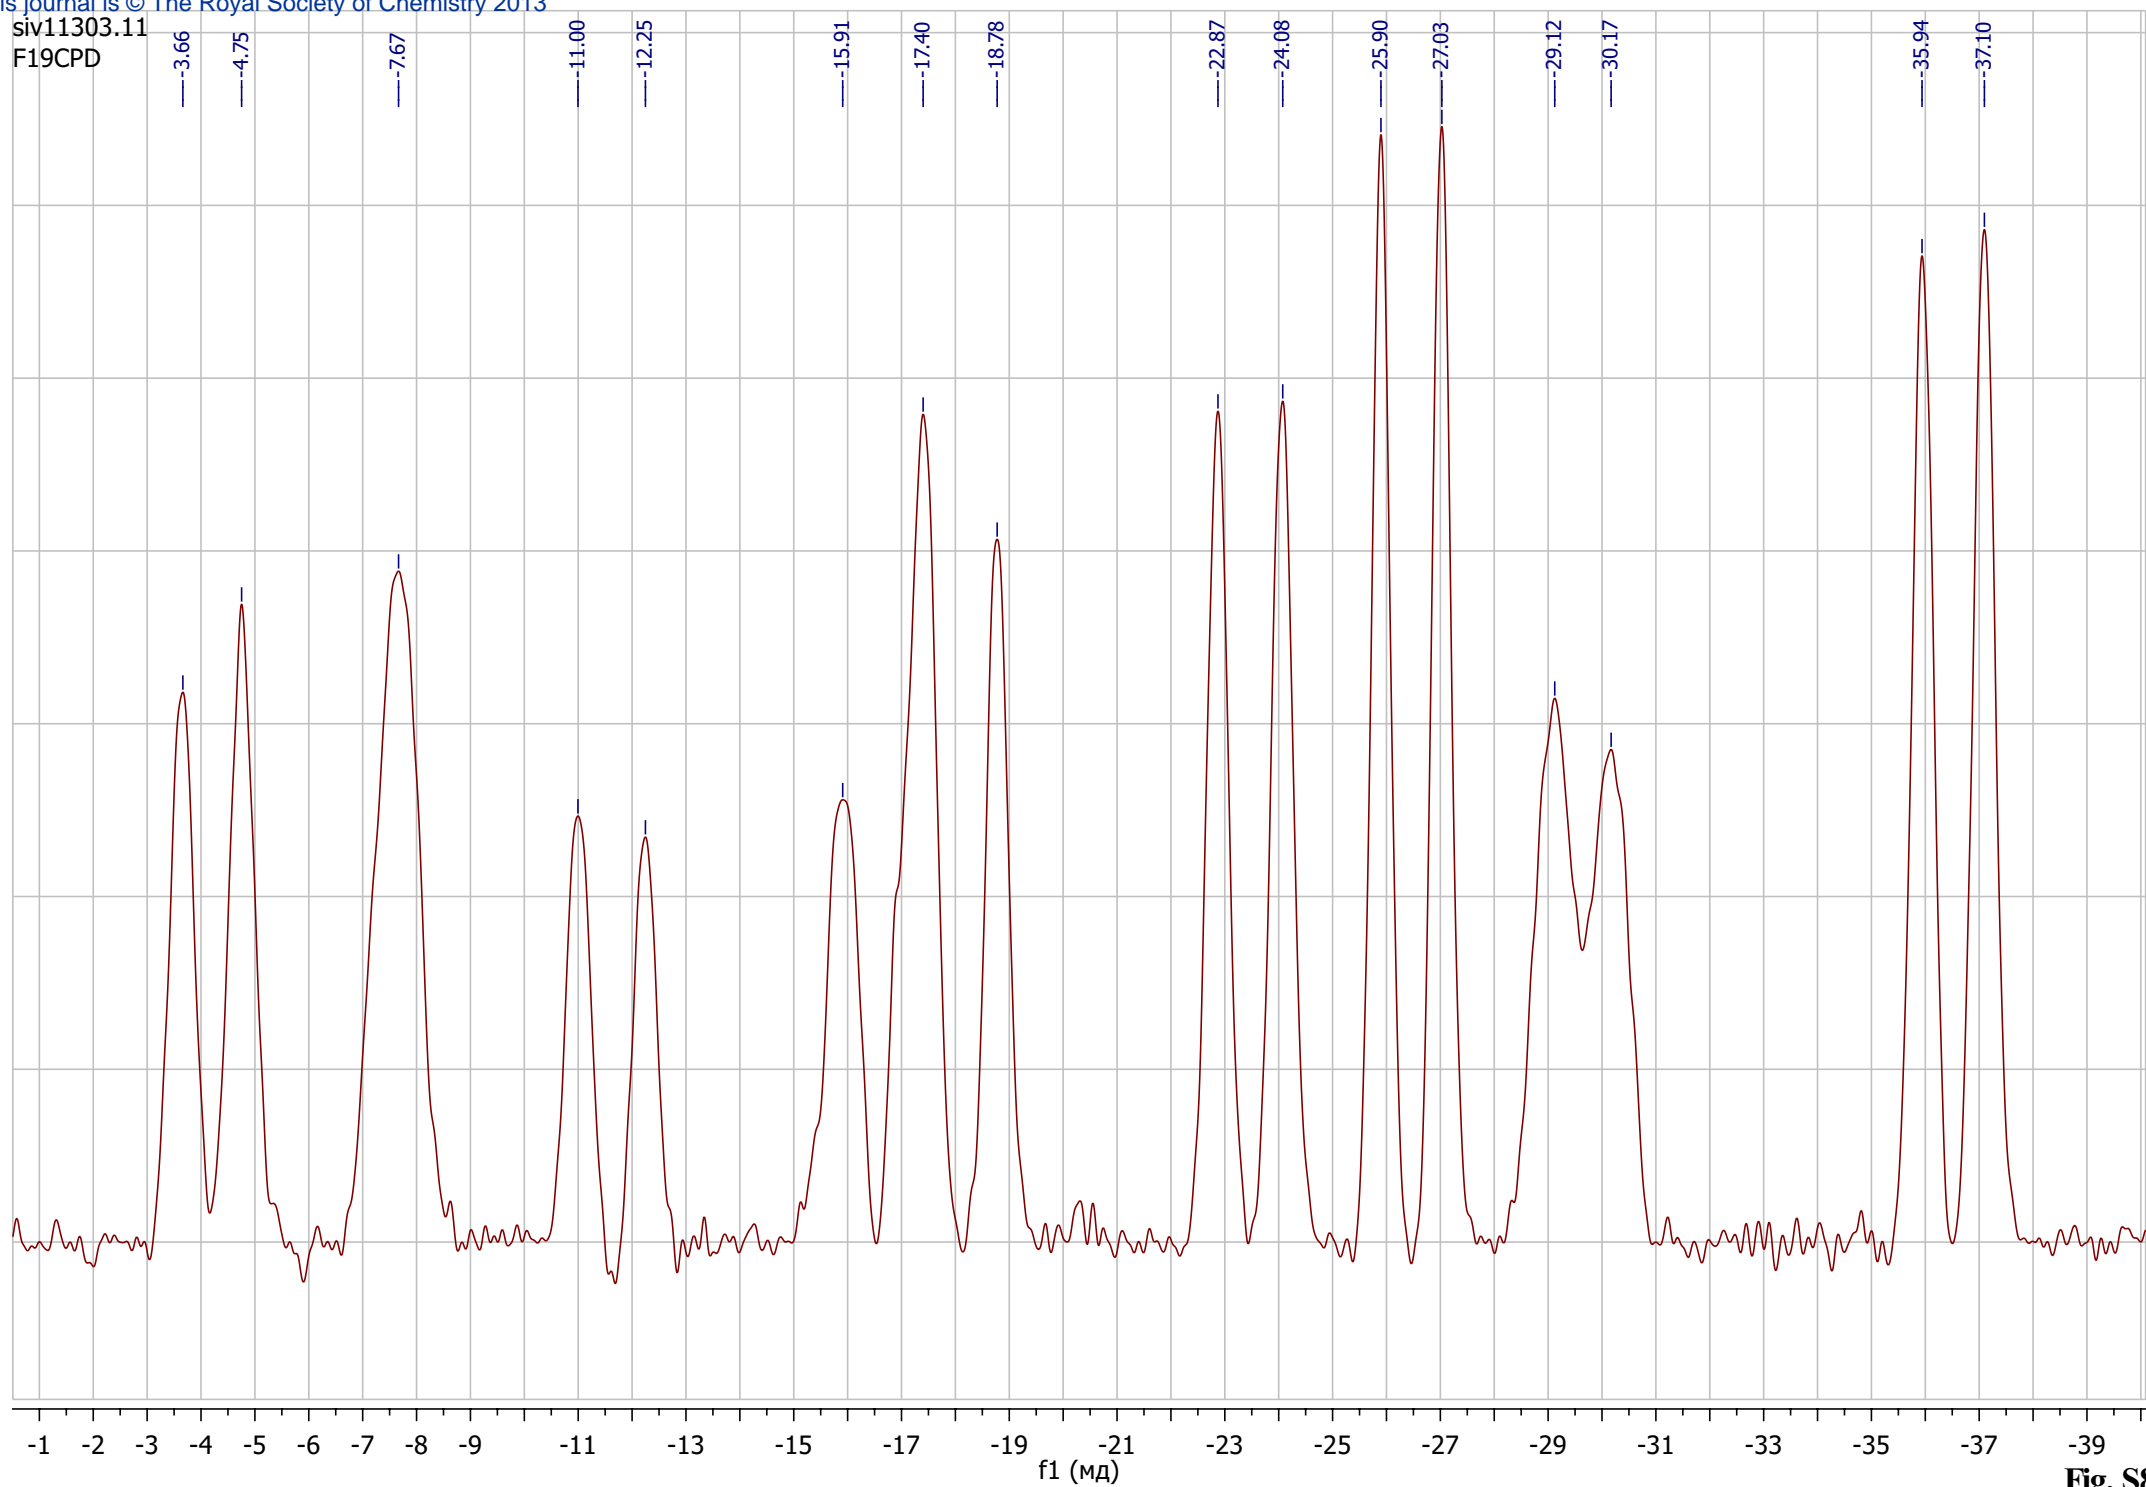

Fig. S8

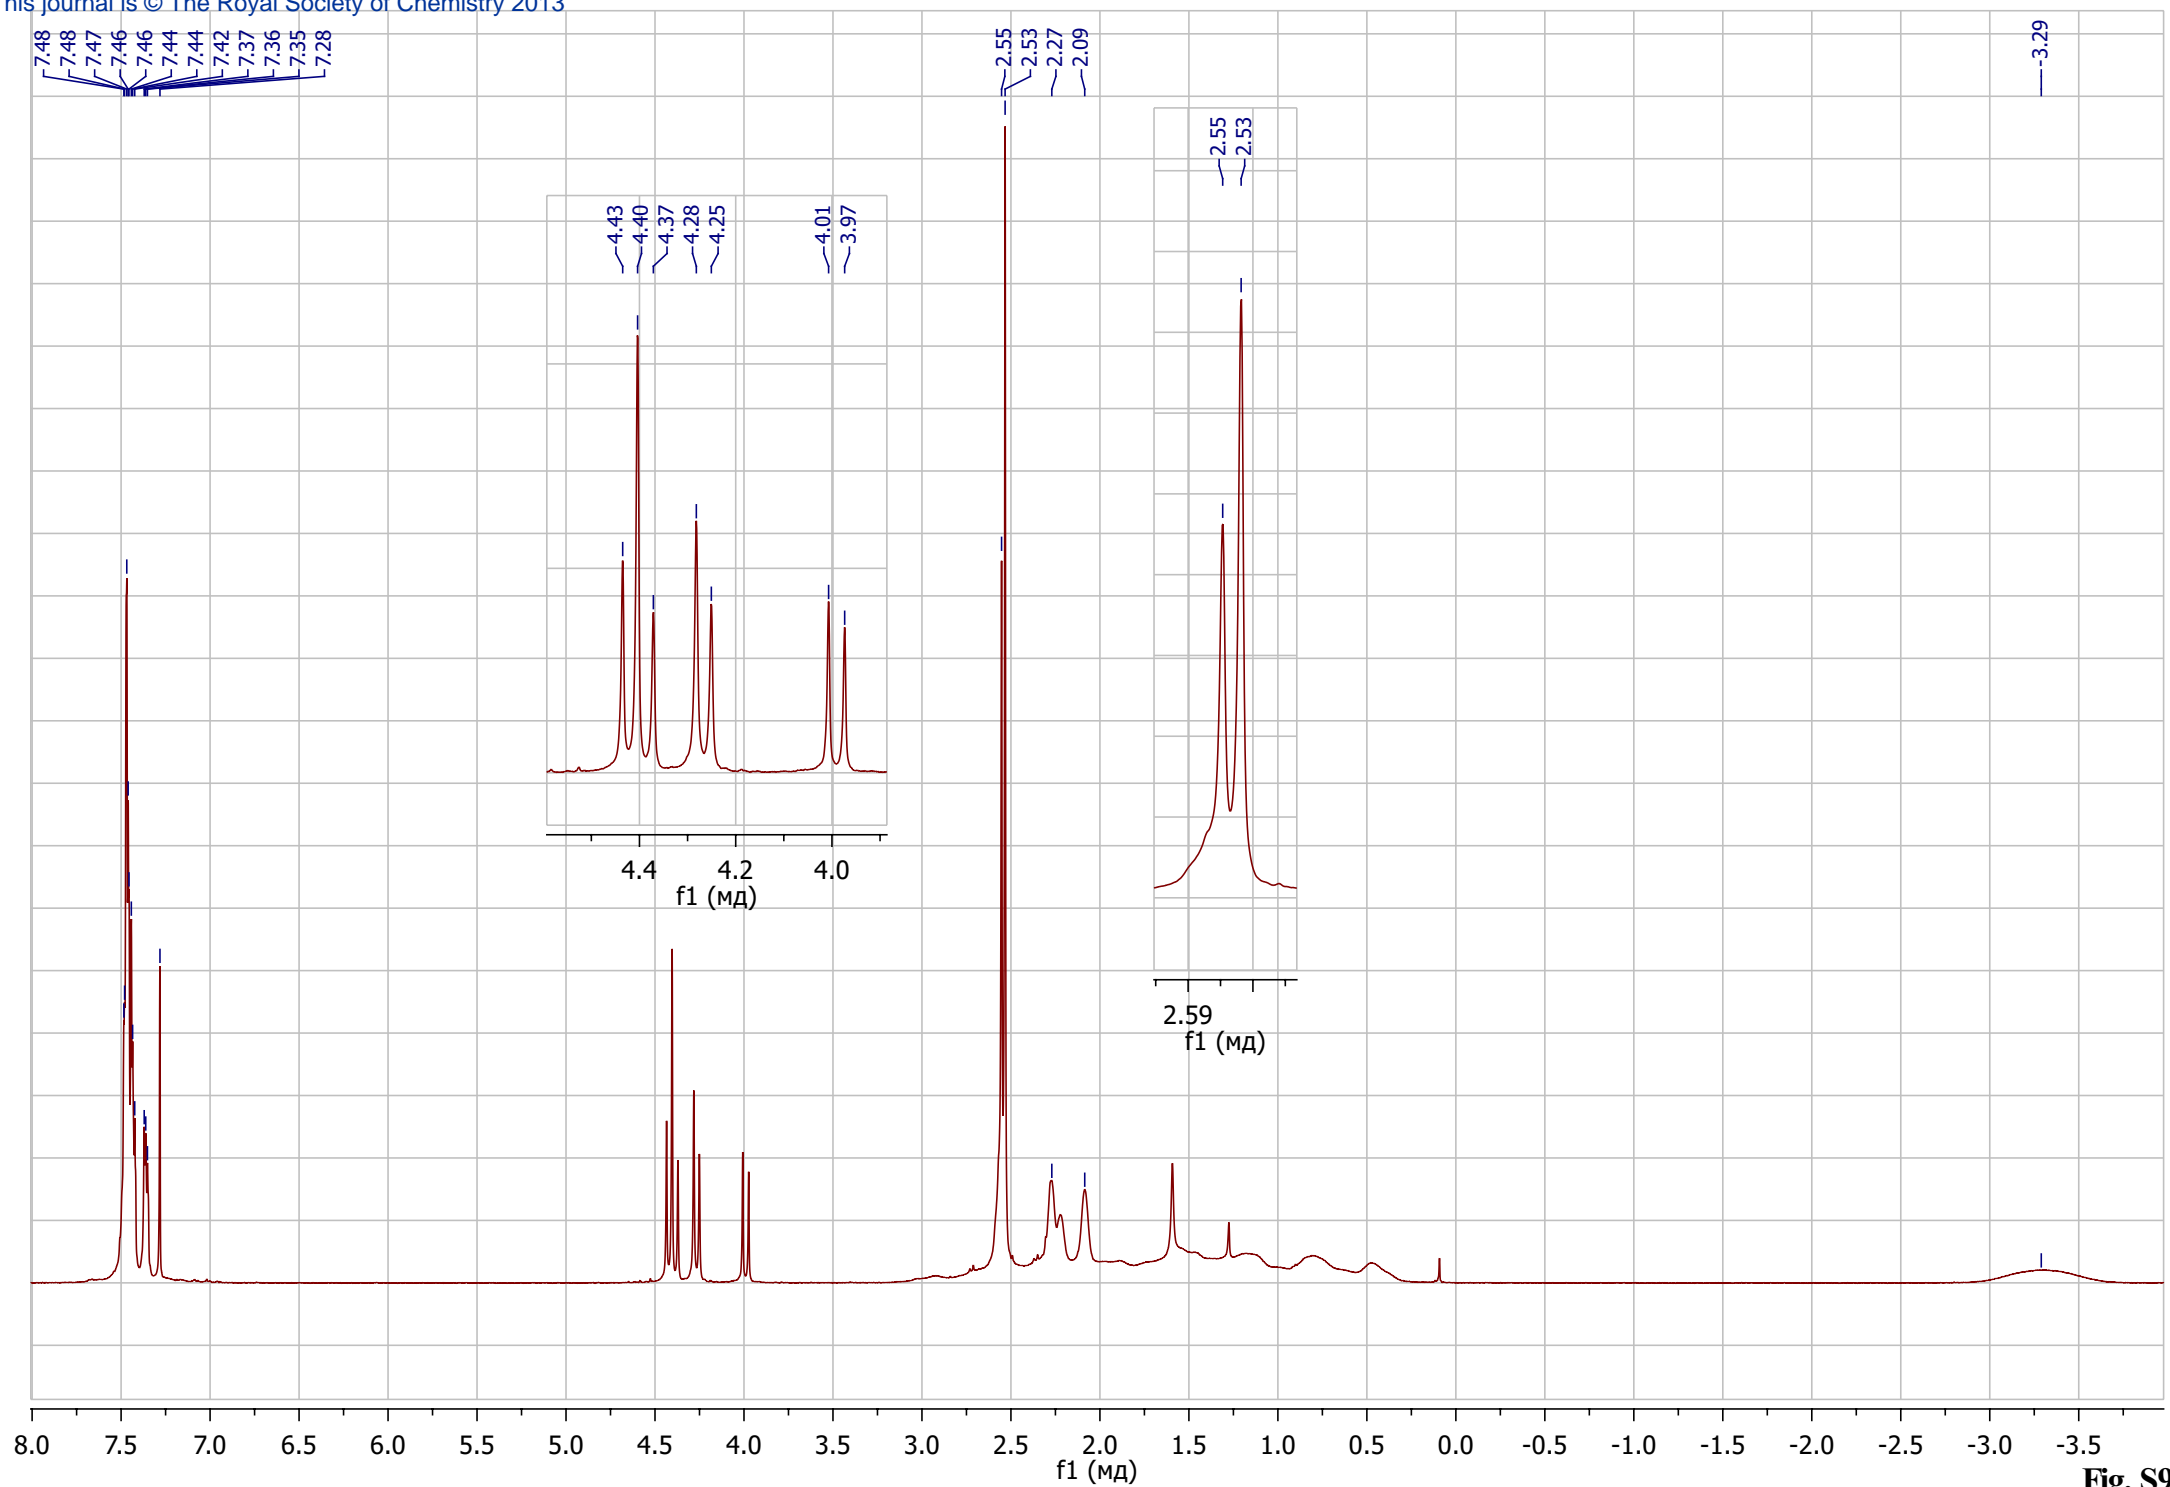

Fig. S9

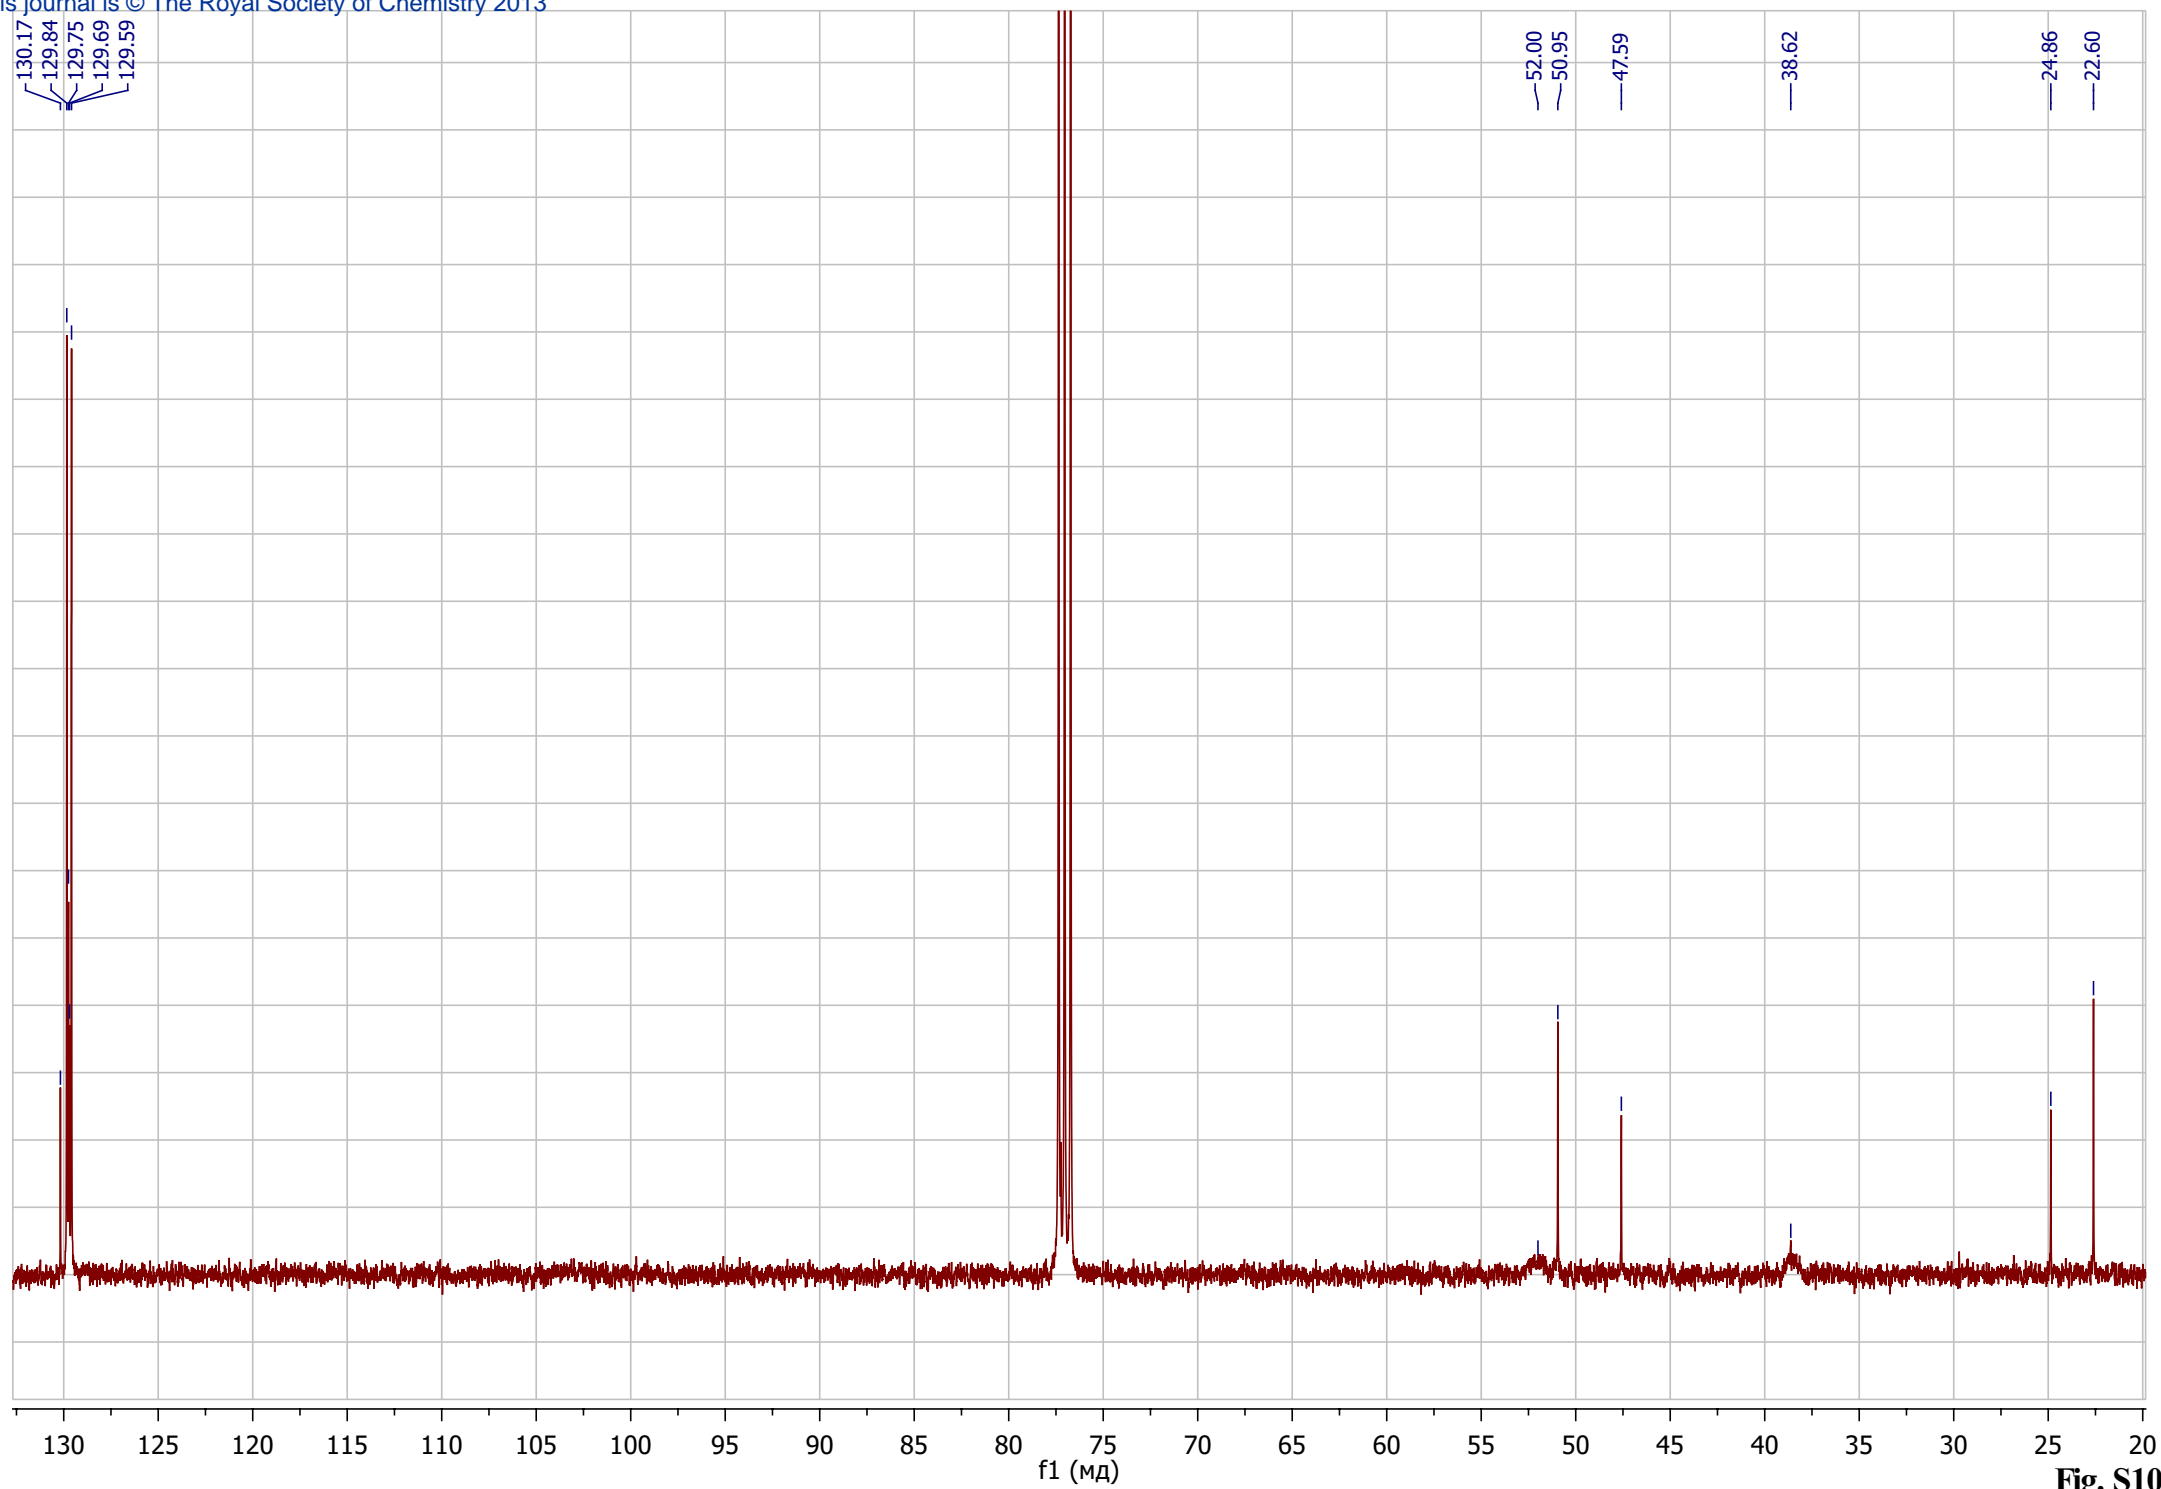

Fig. S10

semi2409-2013  
F19CPD

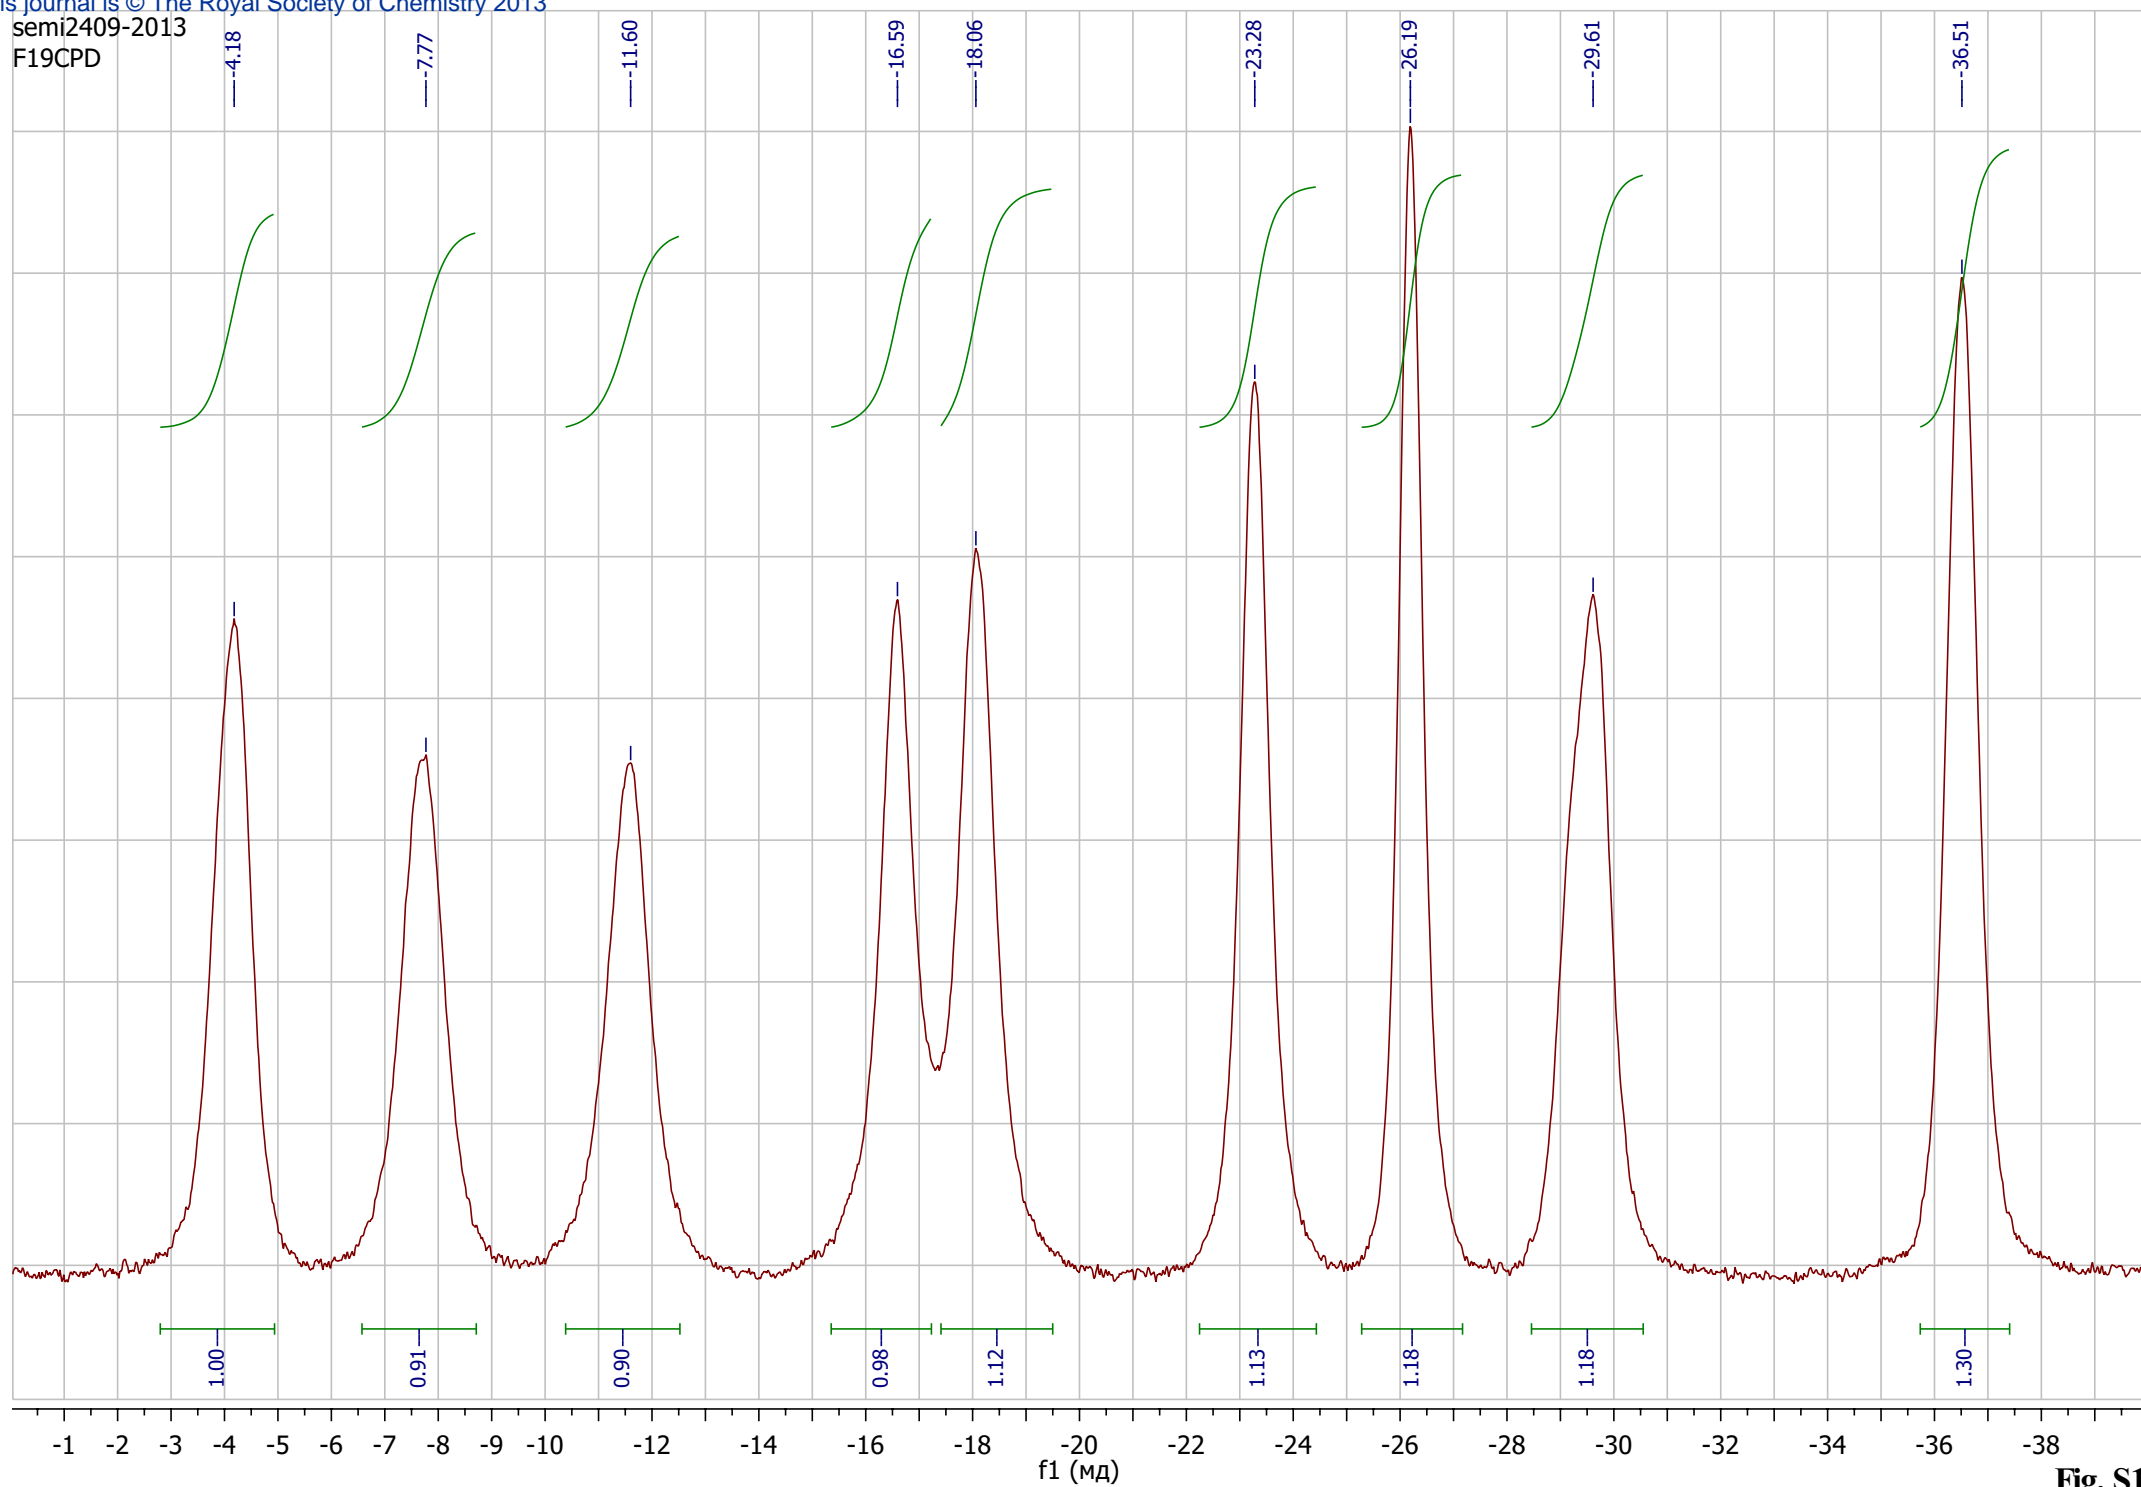

Fig. S11

semi2409-2013  
F19CPD

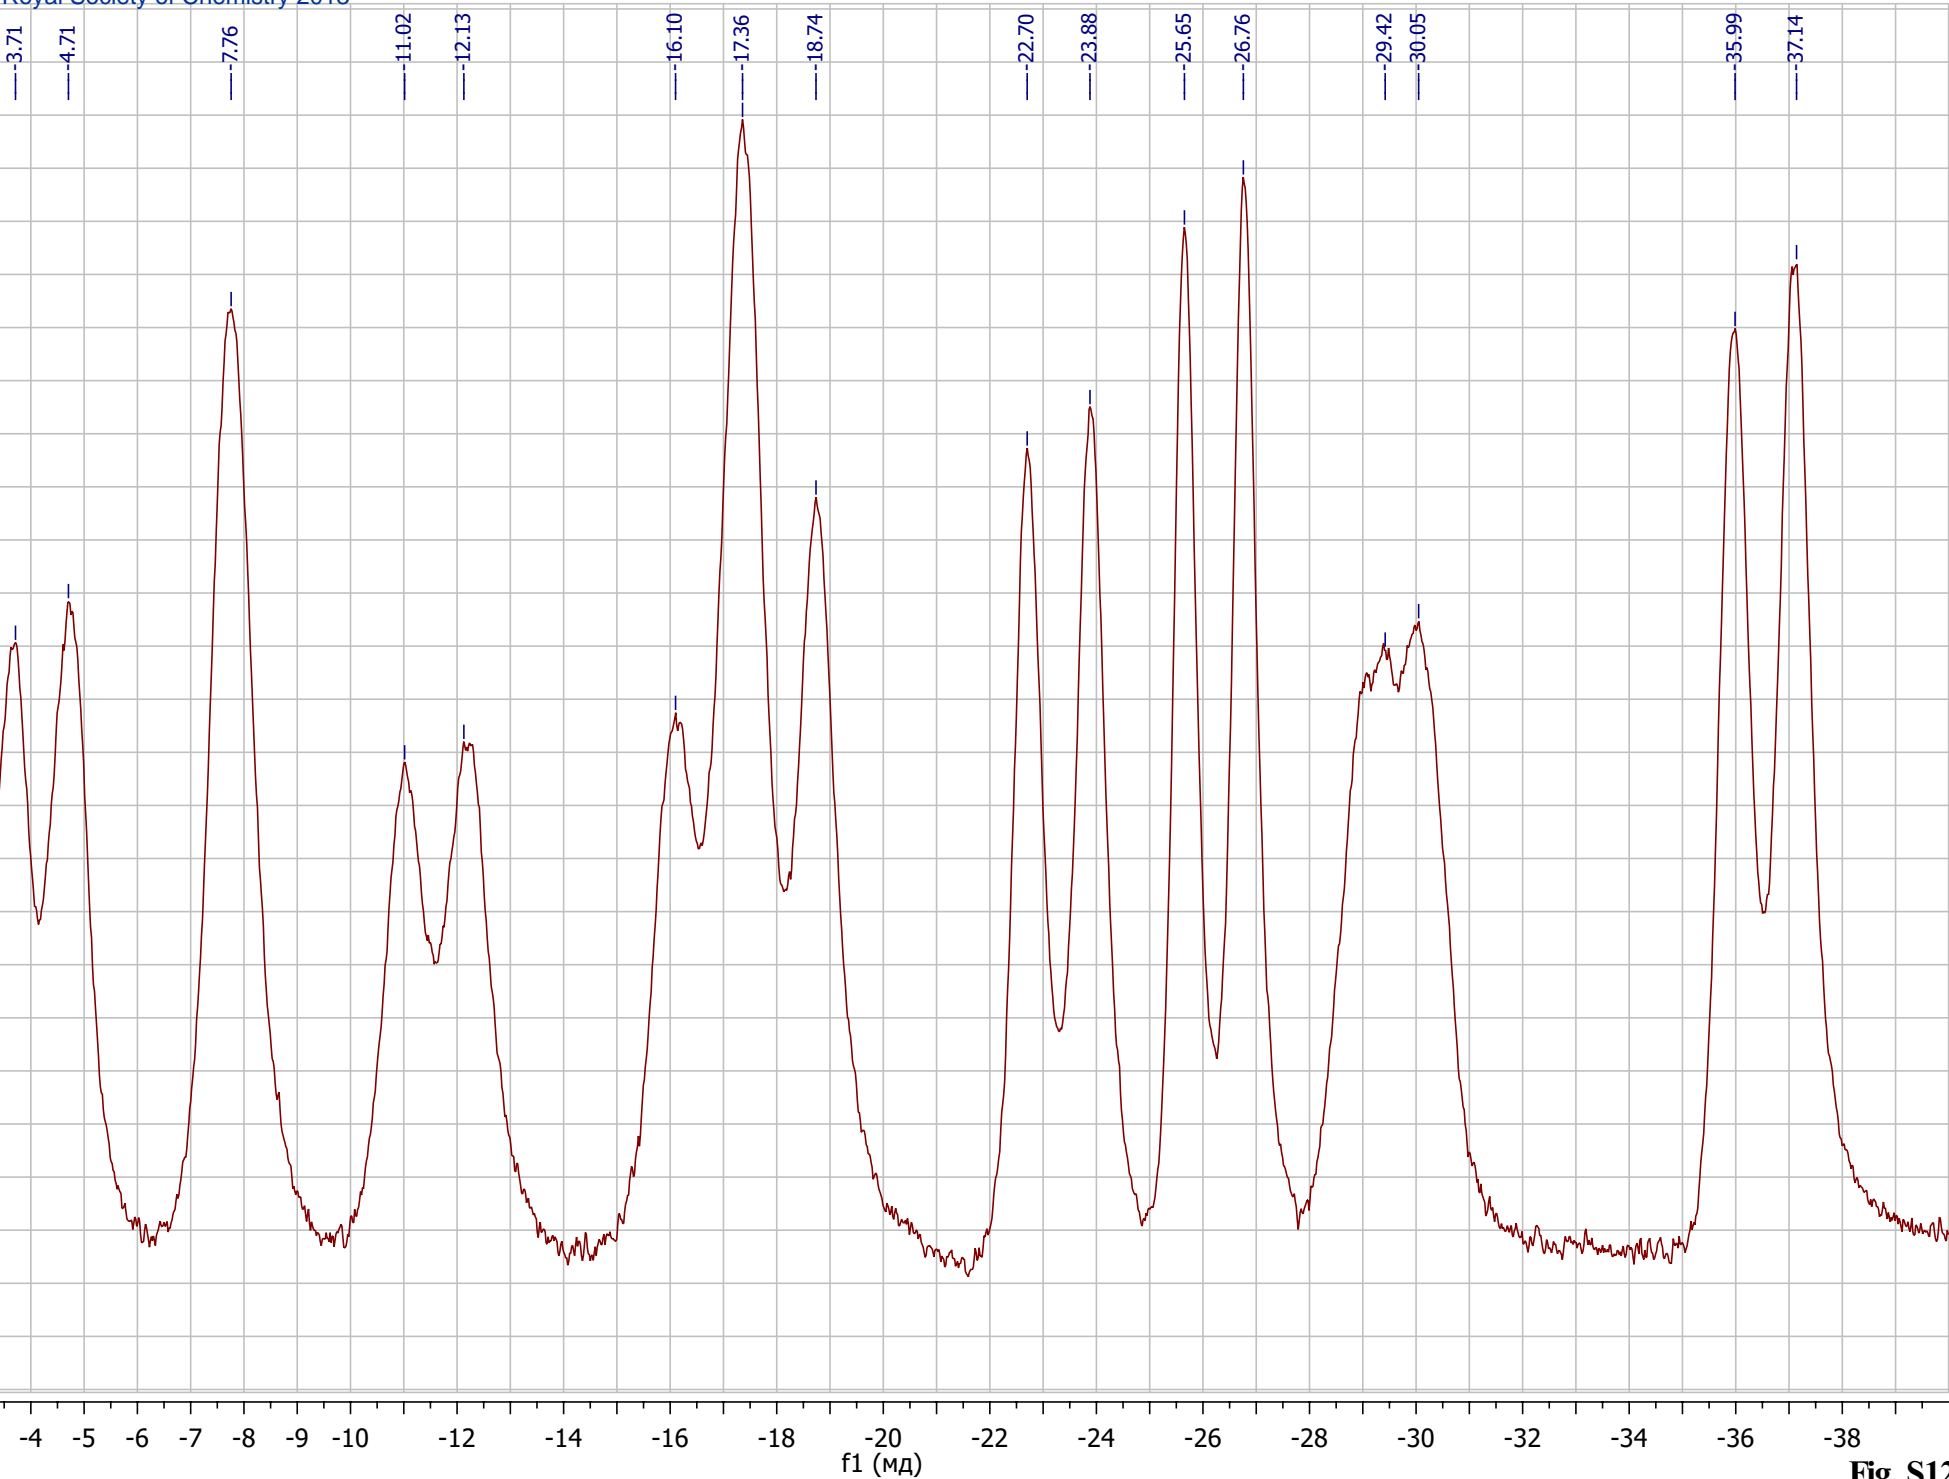

Fig. S12

semi1502-2011

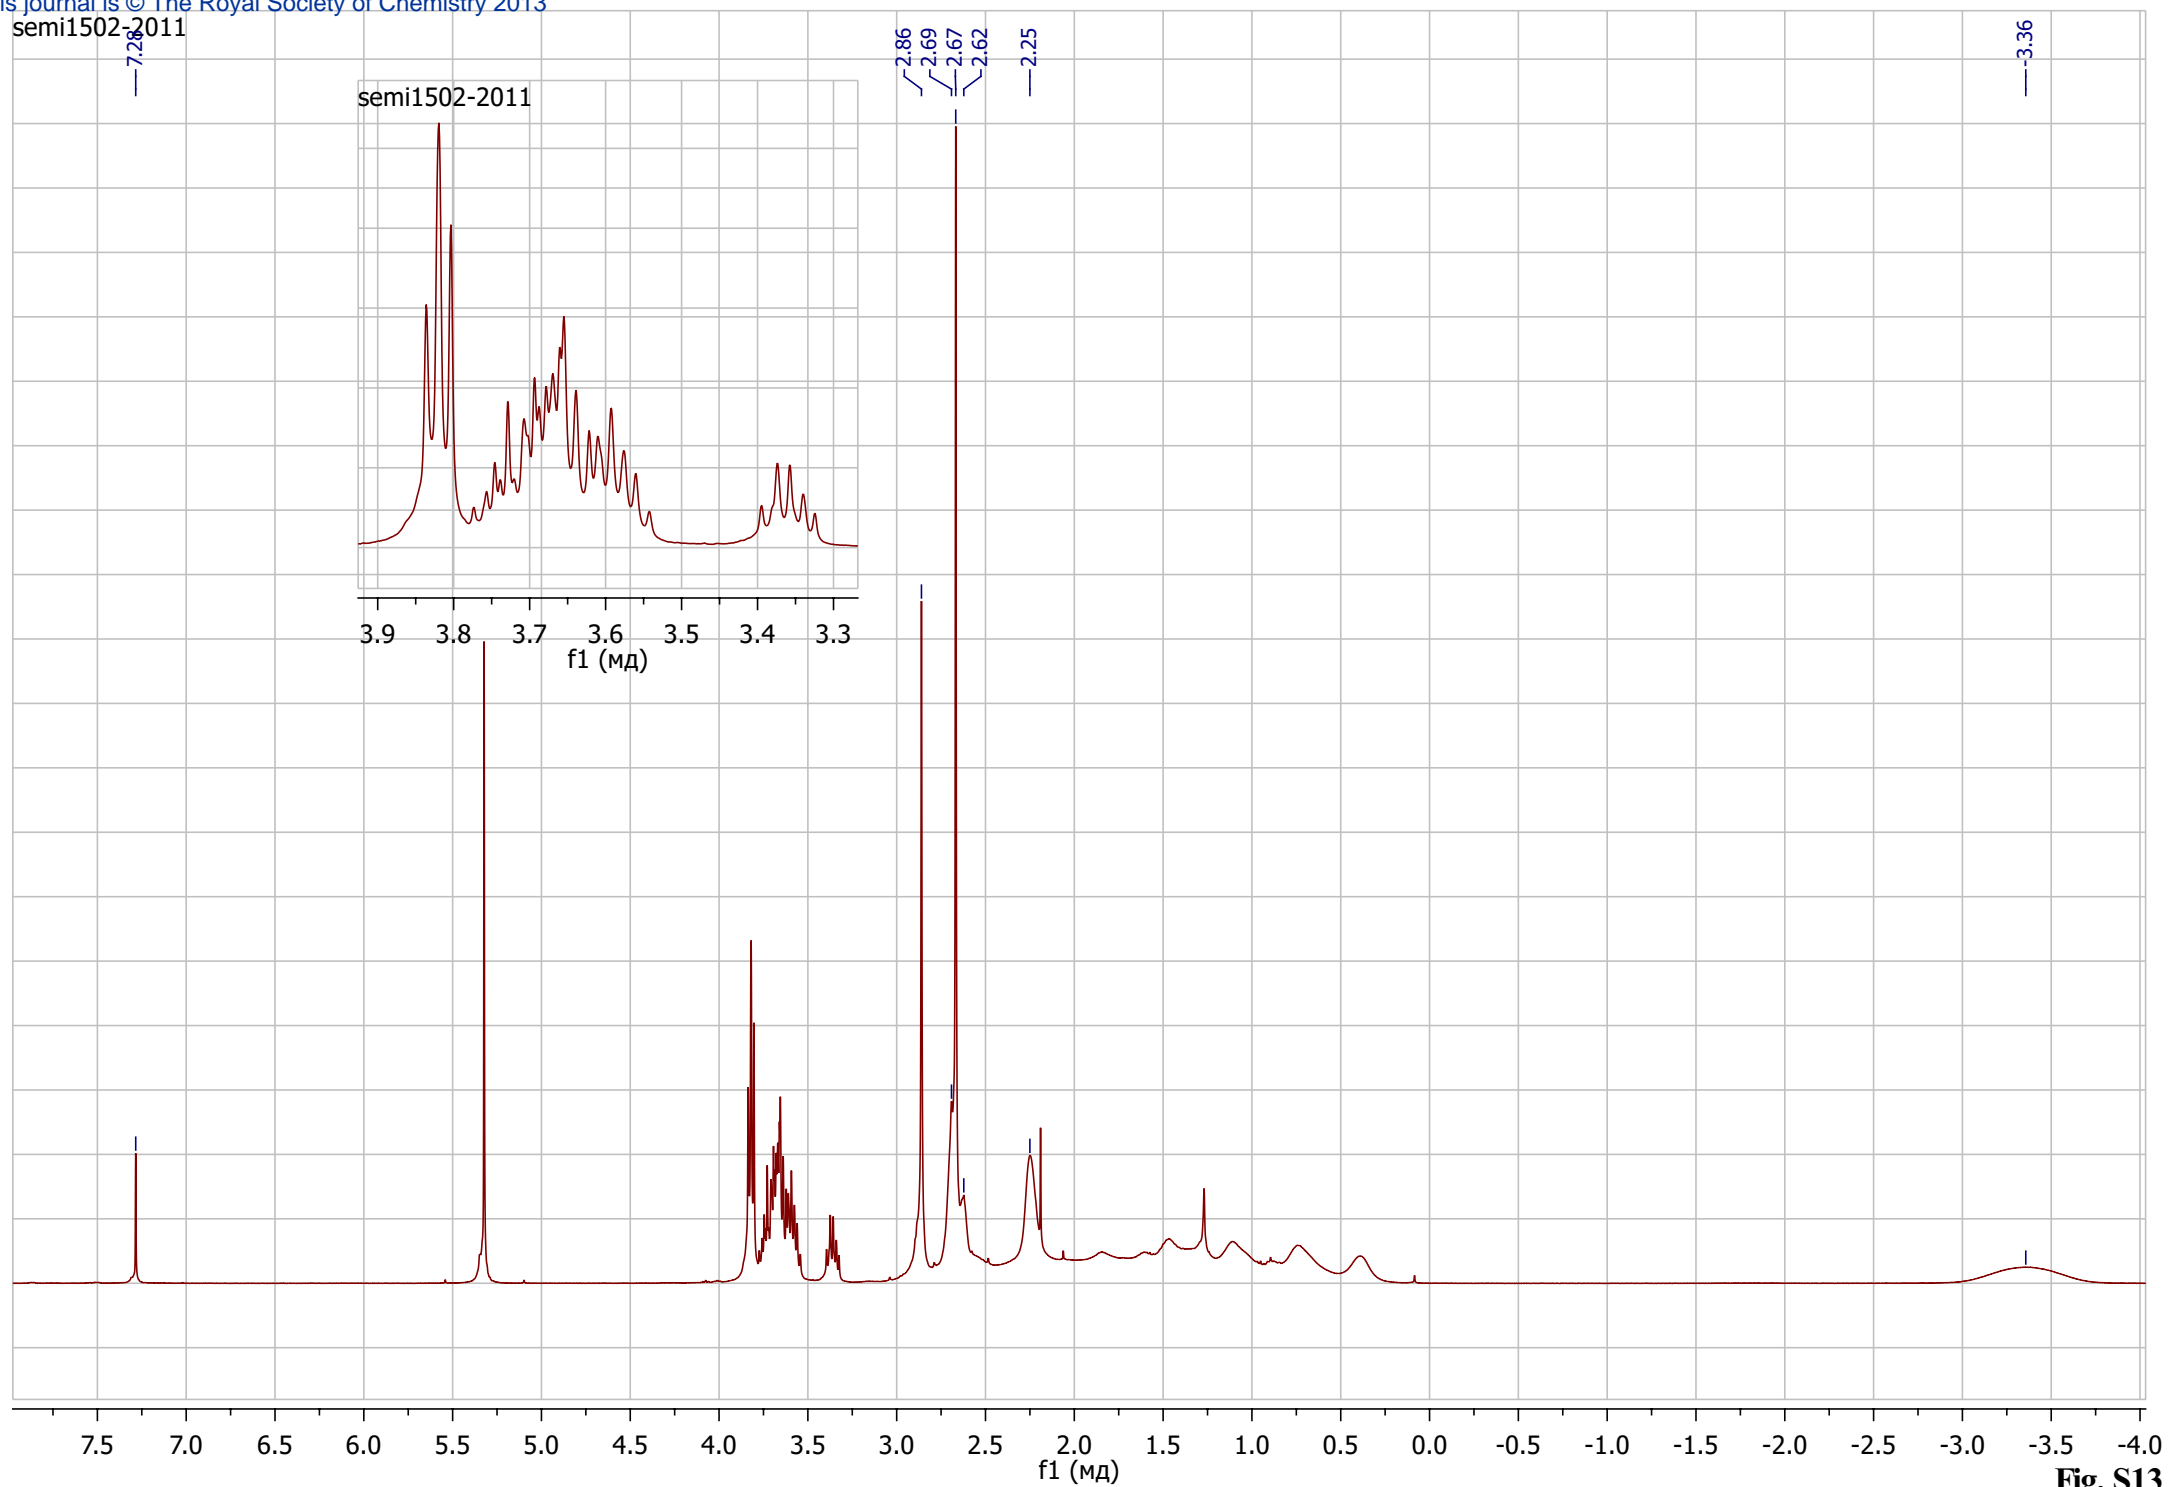

Fig. S13

semi1502-2011  
F19CPD

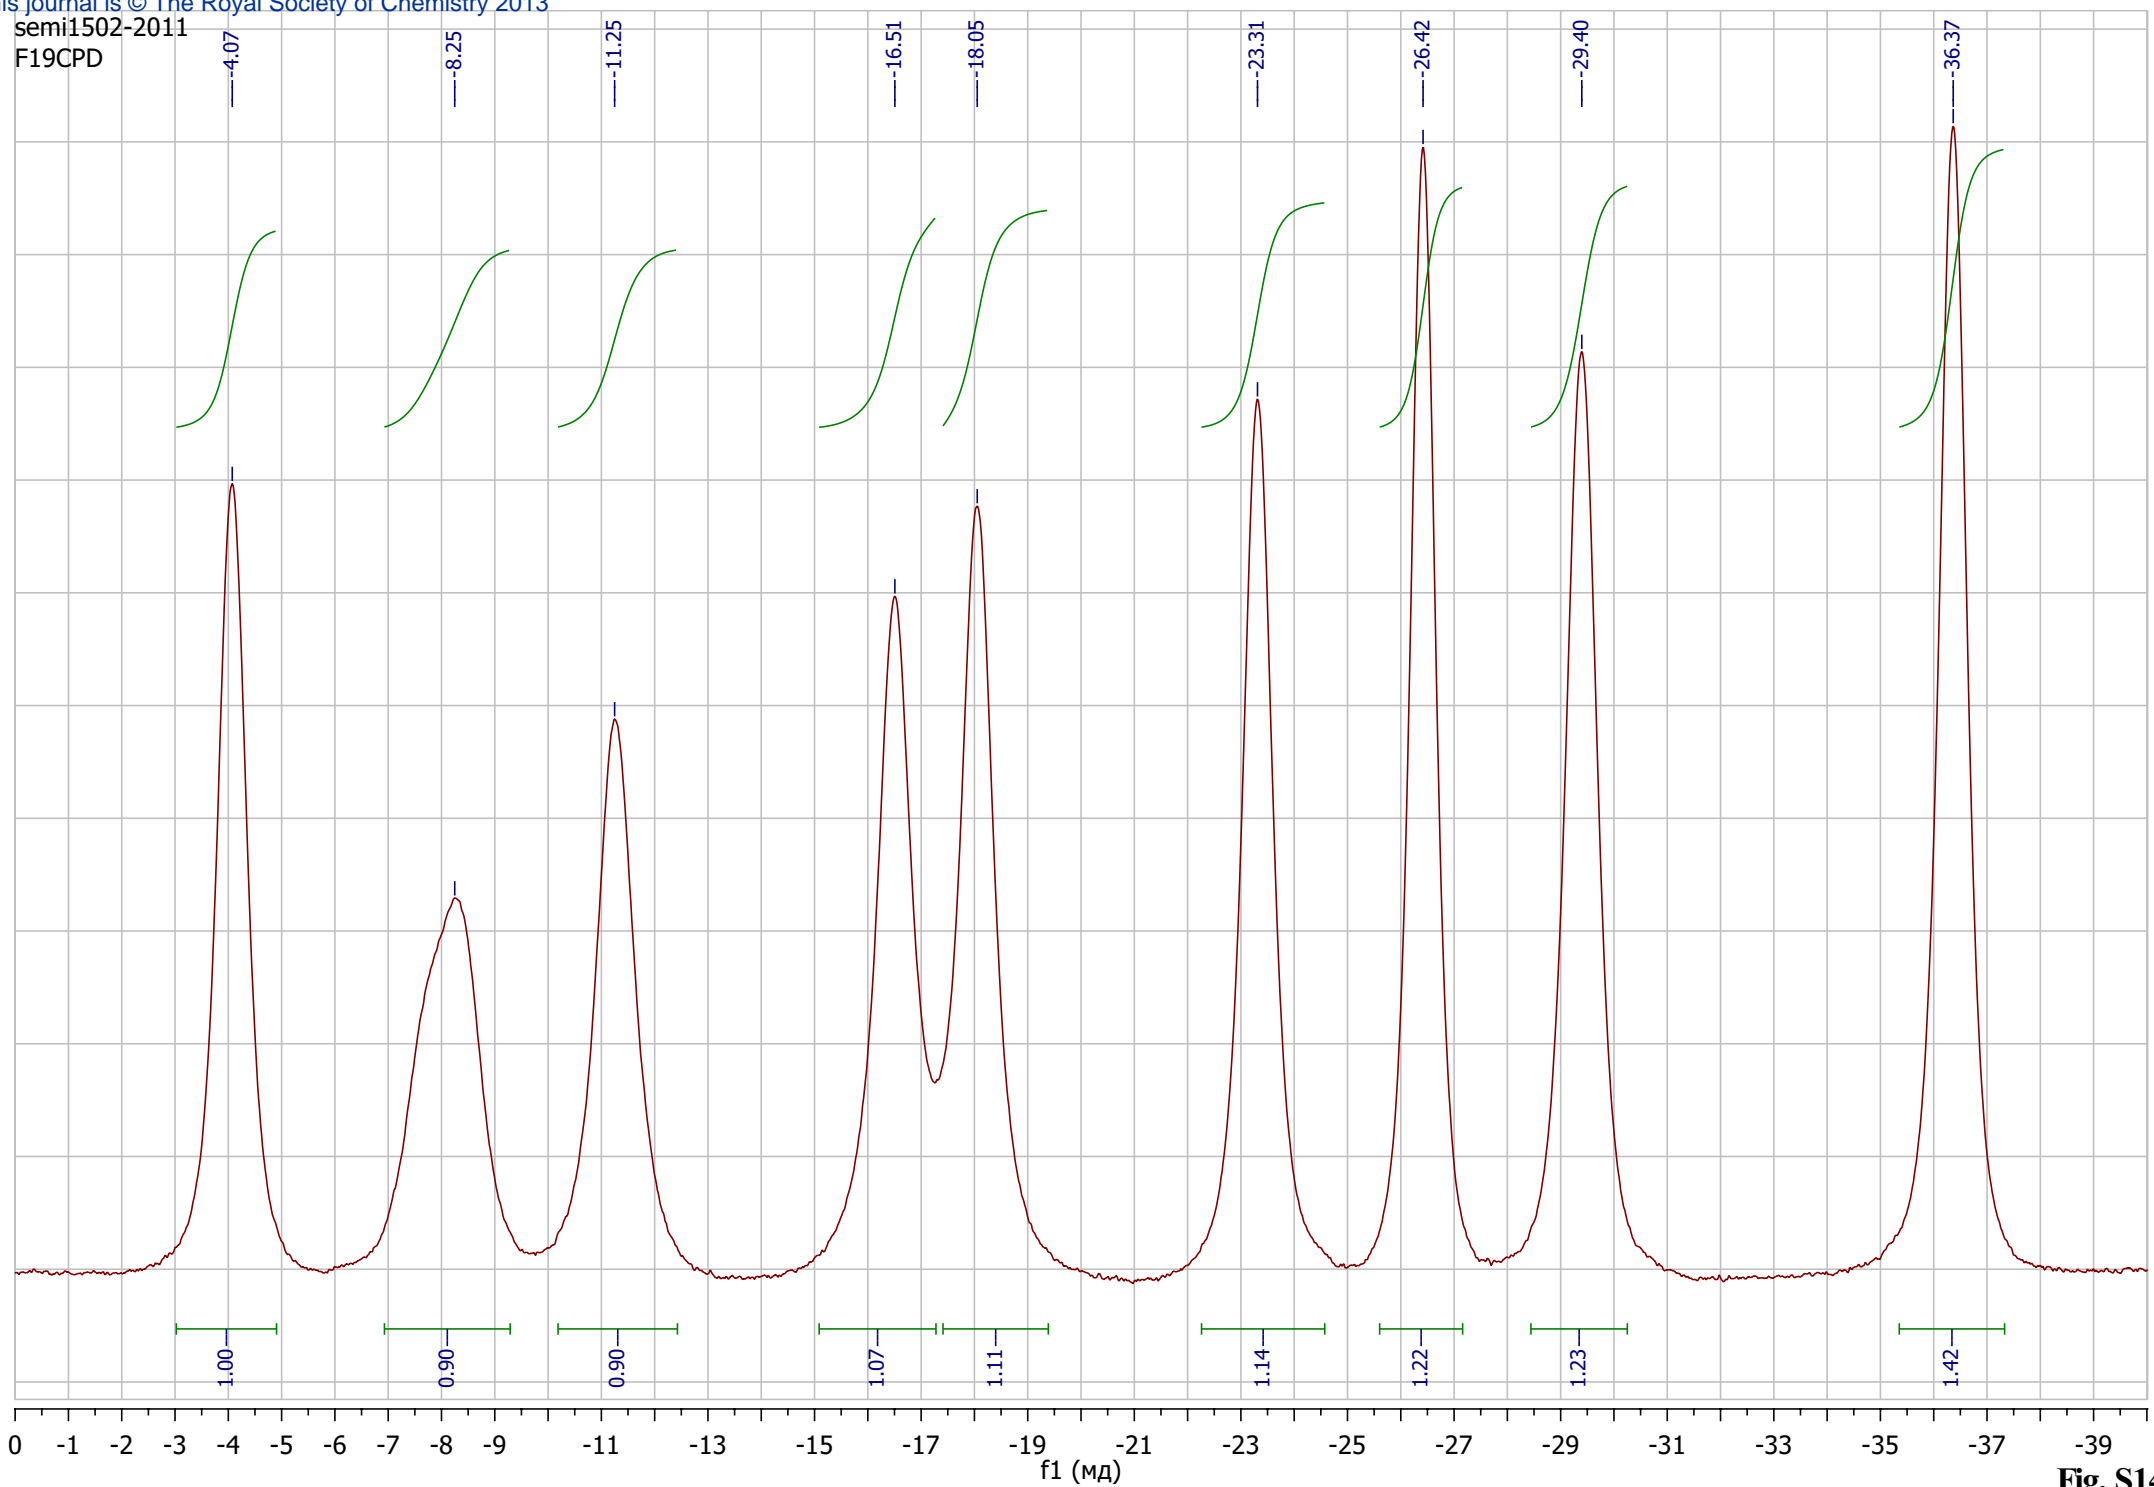

Fig. S14



semi1502-2011  
F19CPD

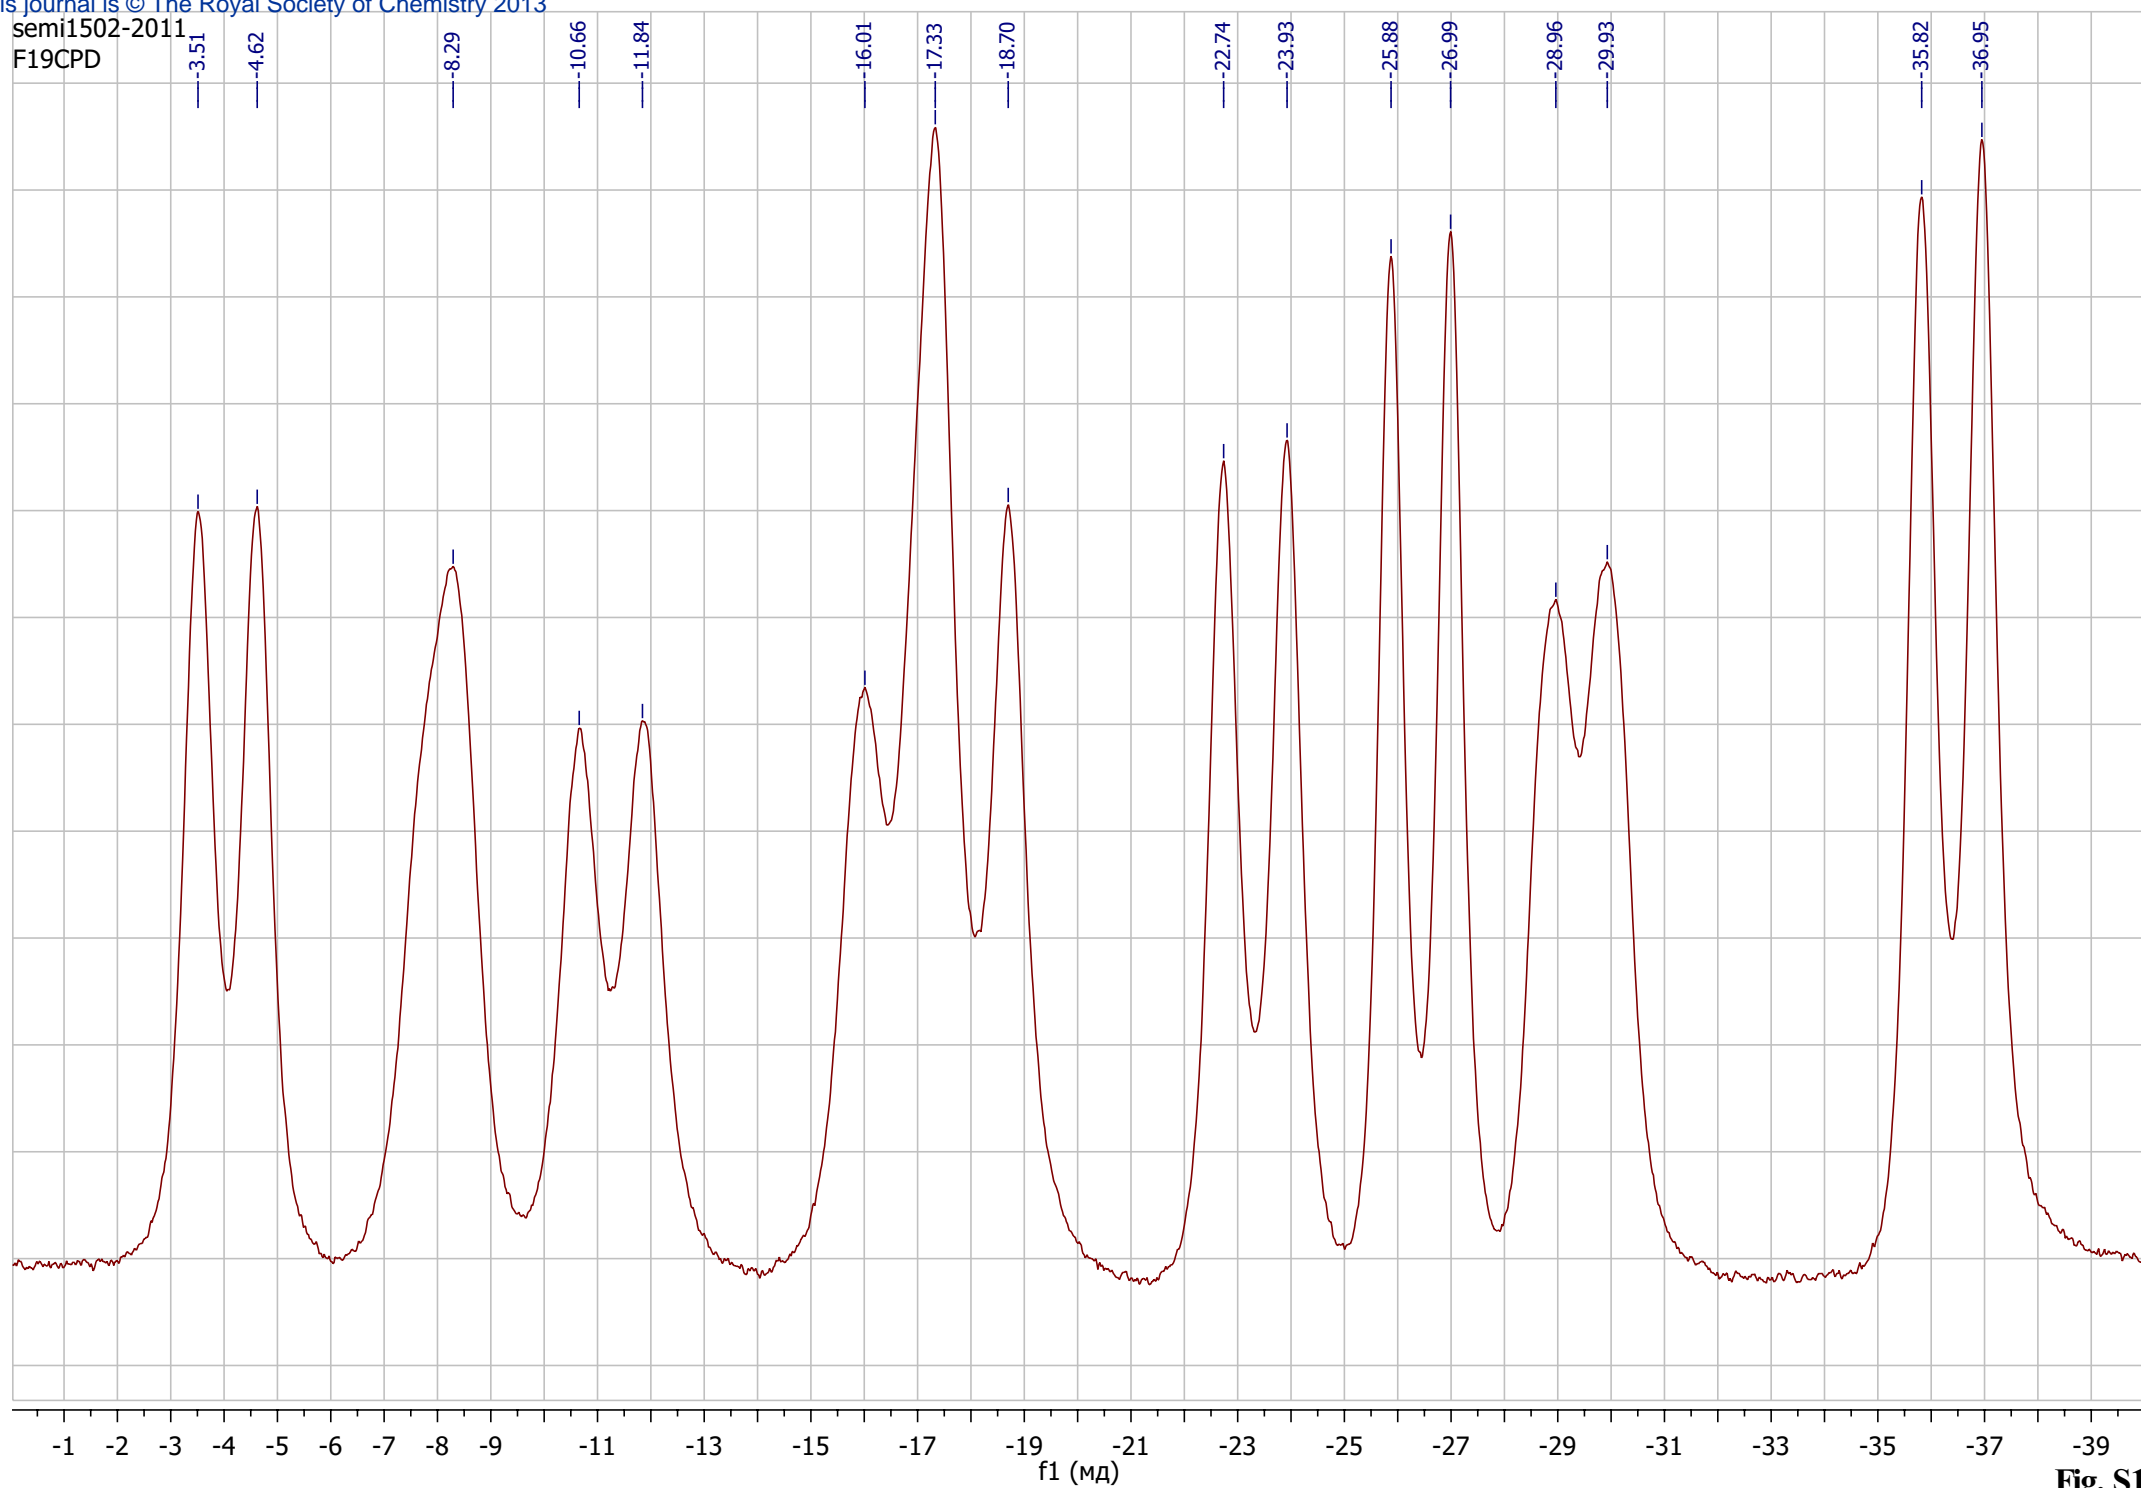

Fig. S15

semi2203-2011

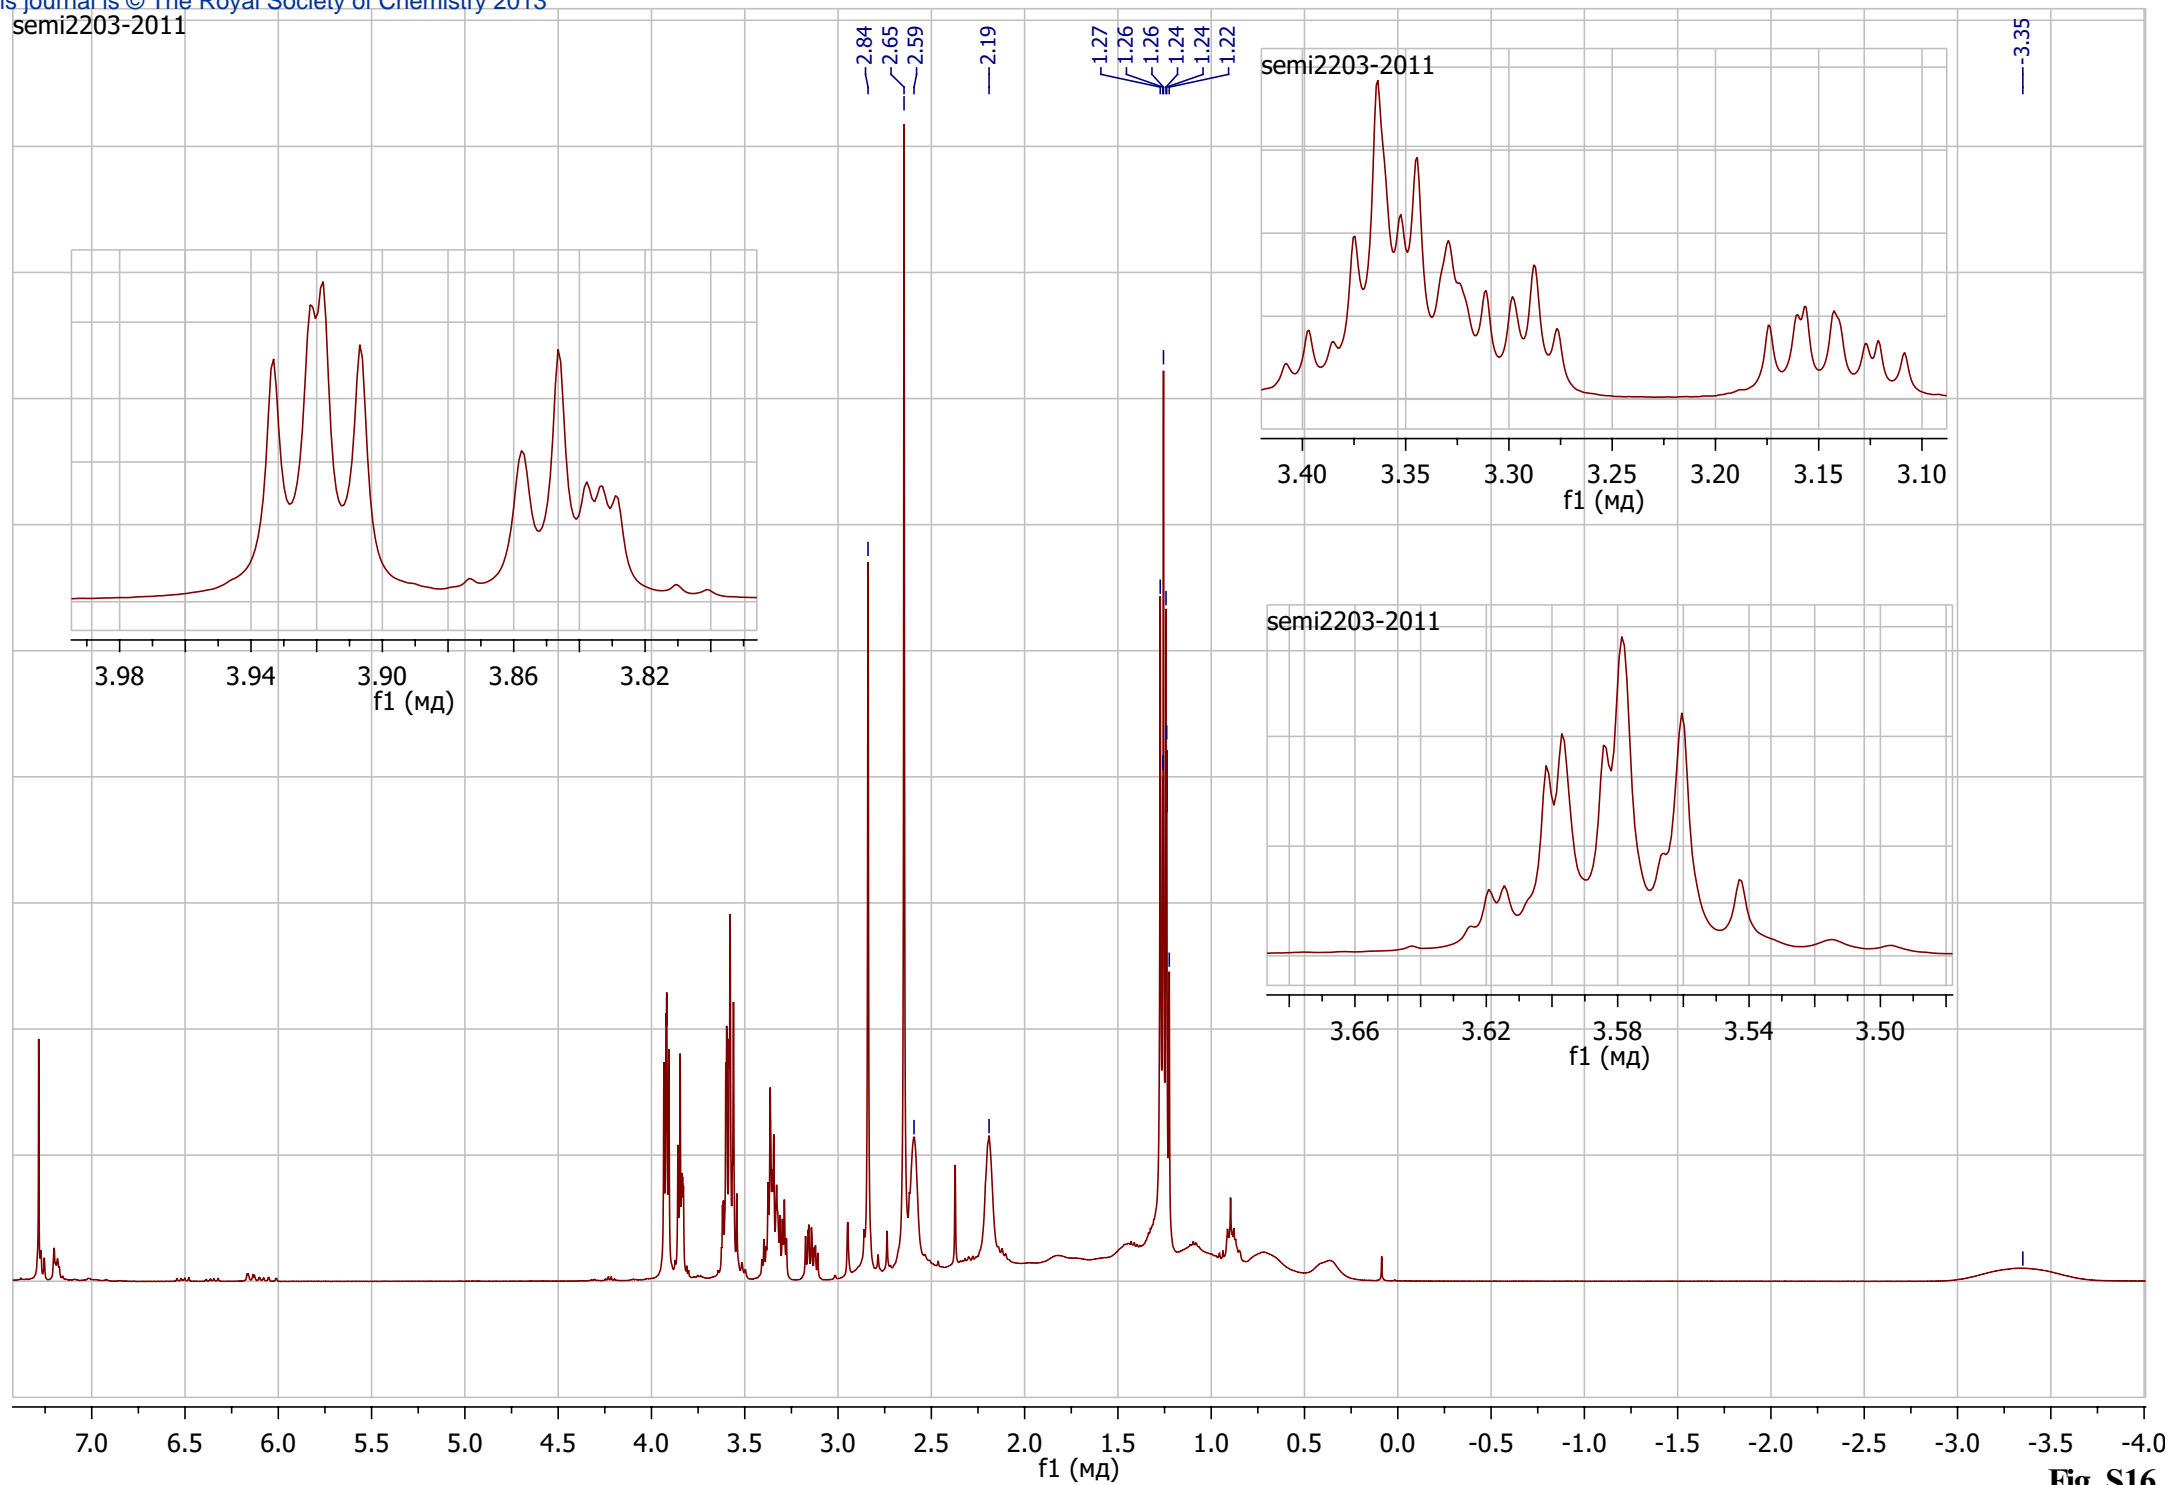

Fig. S16

semi2203-2011  
F19CPD

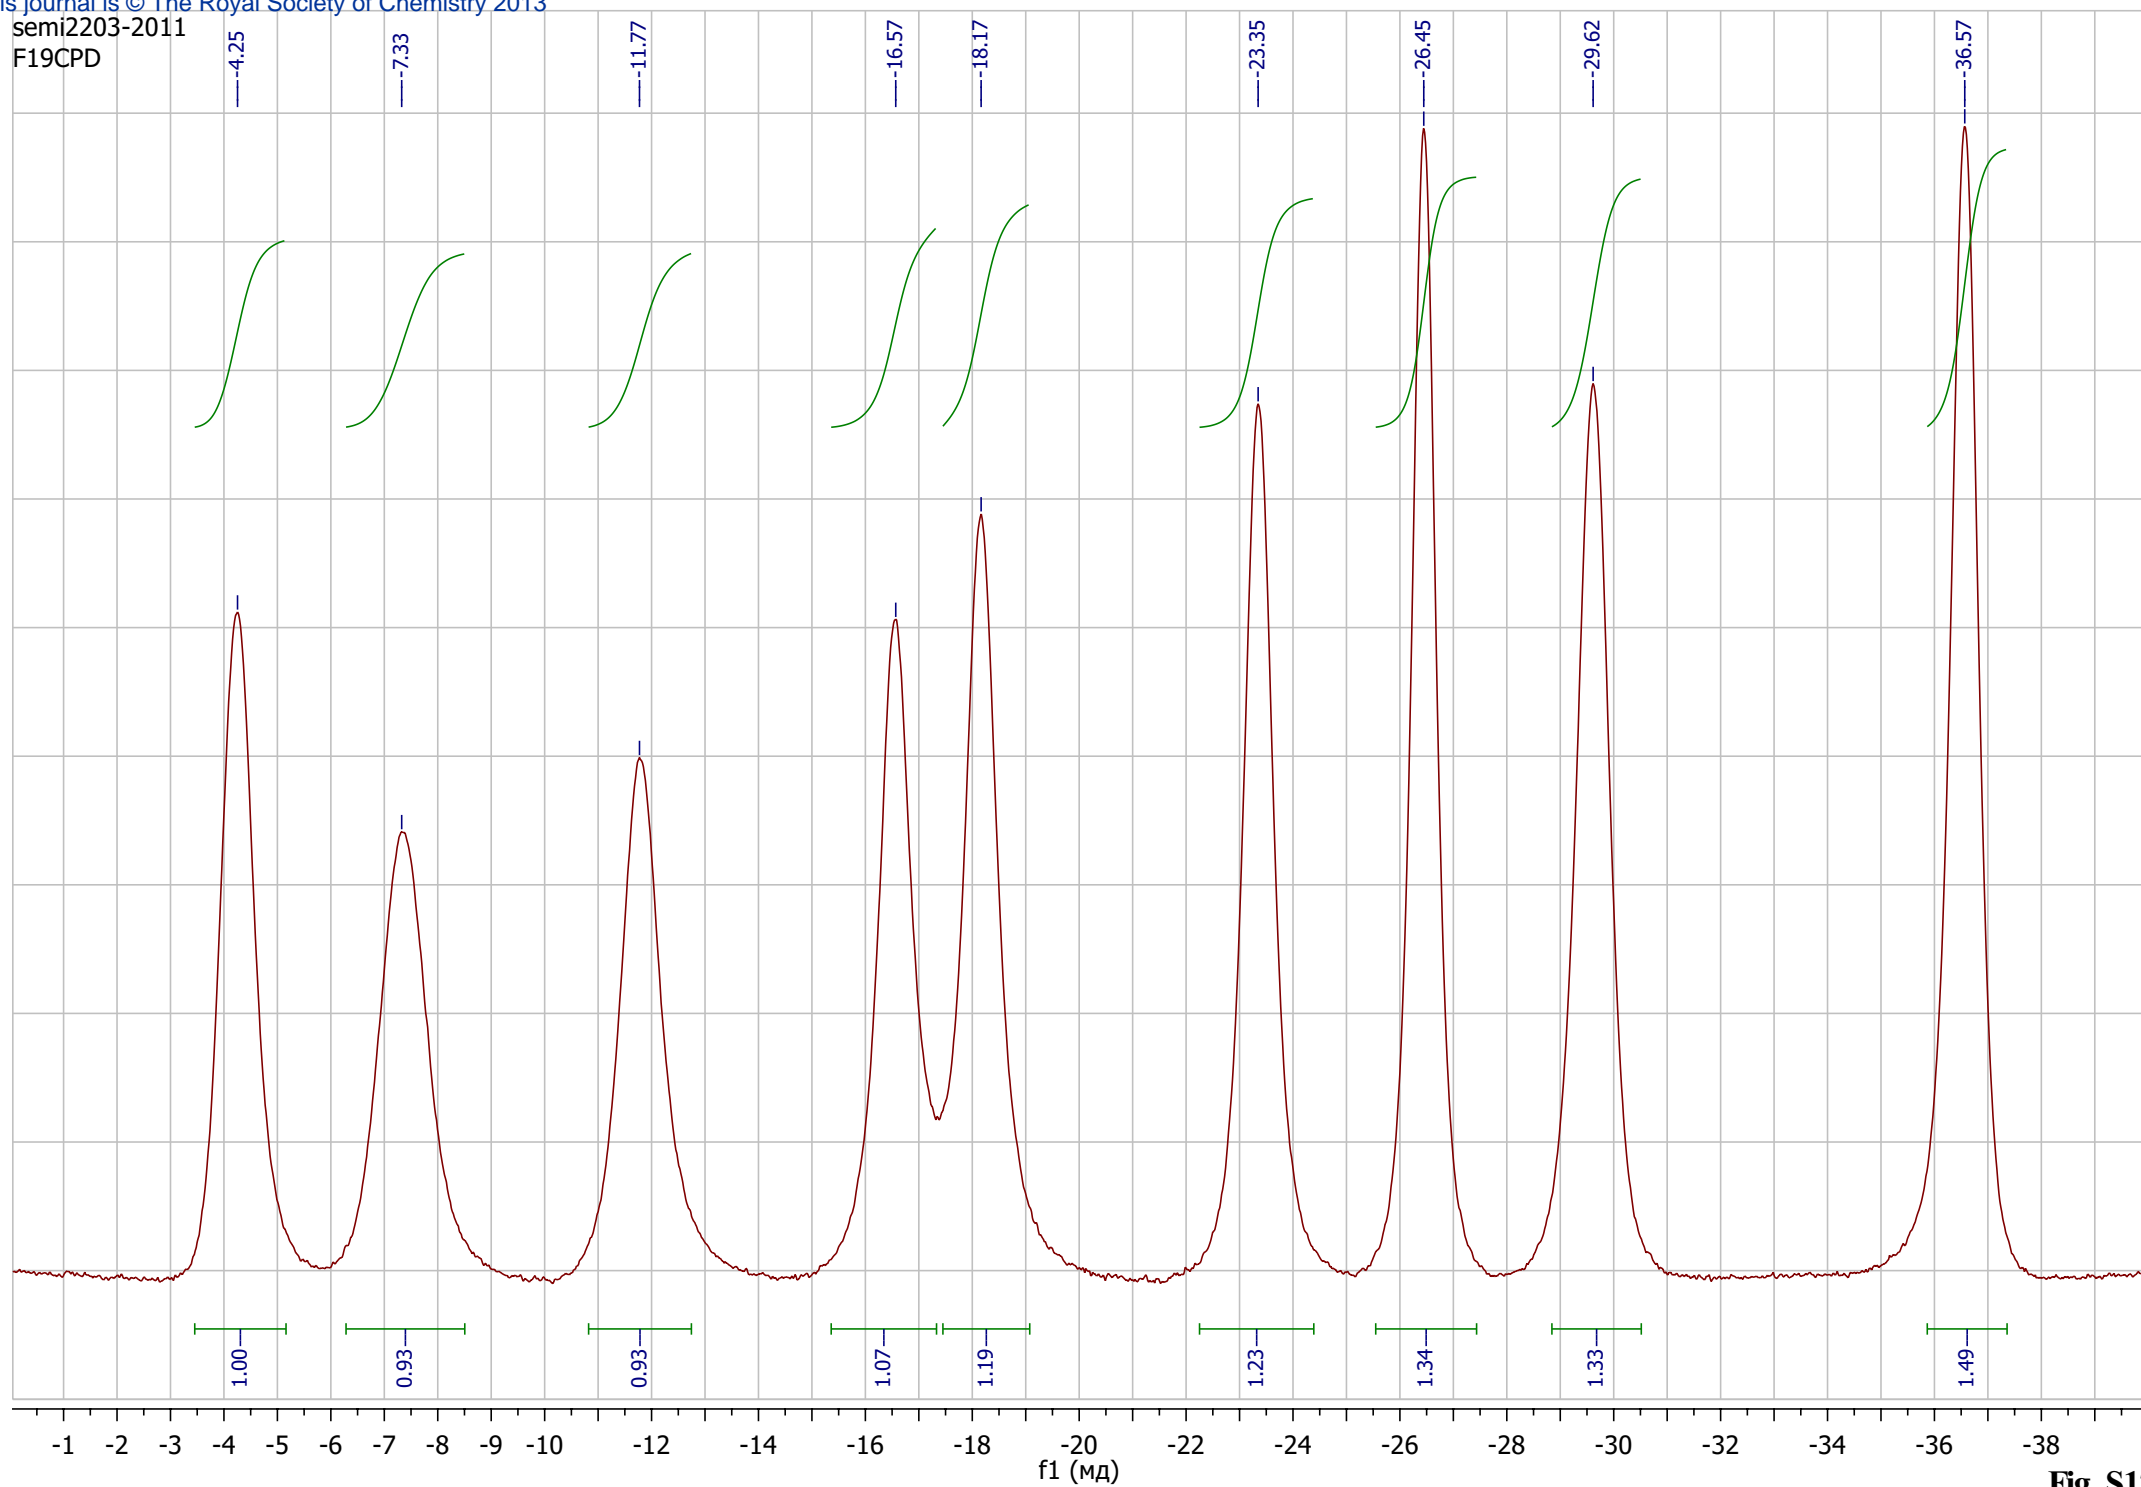

Fig. S17

semi2203-2011

F19CPD

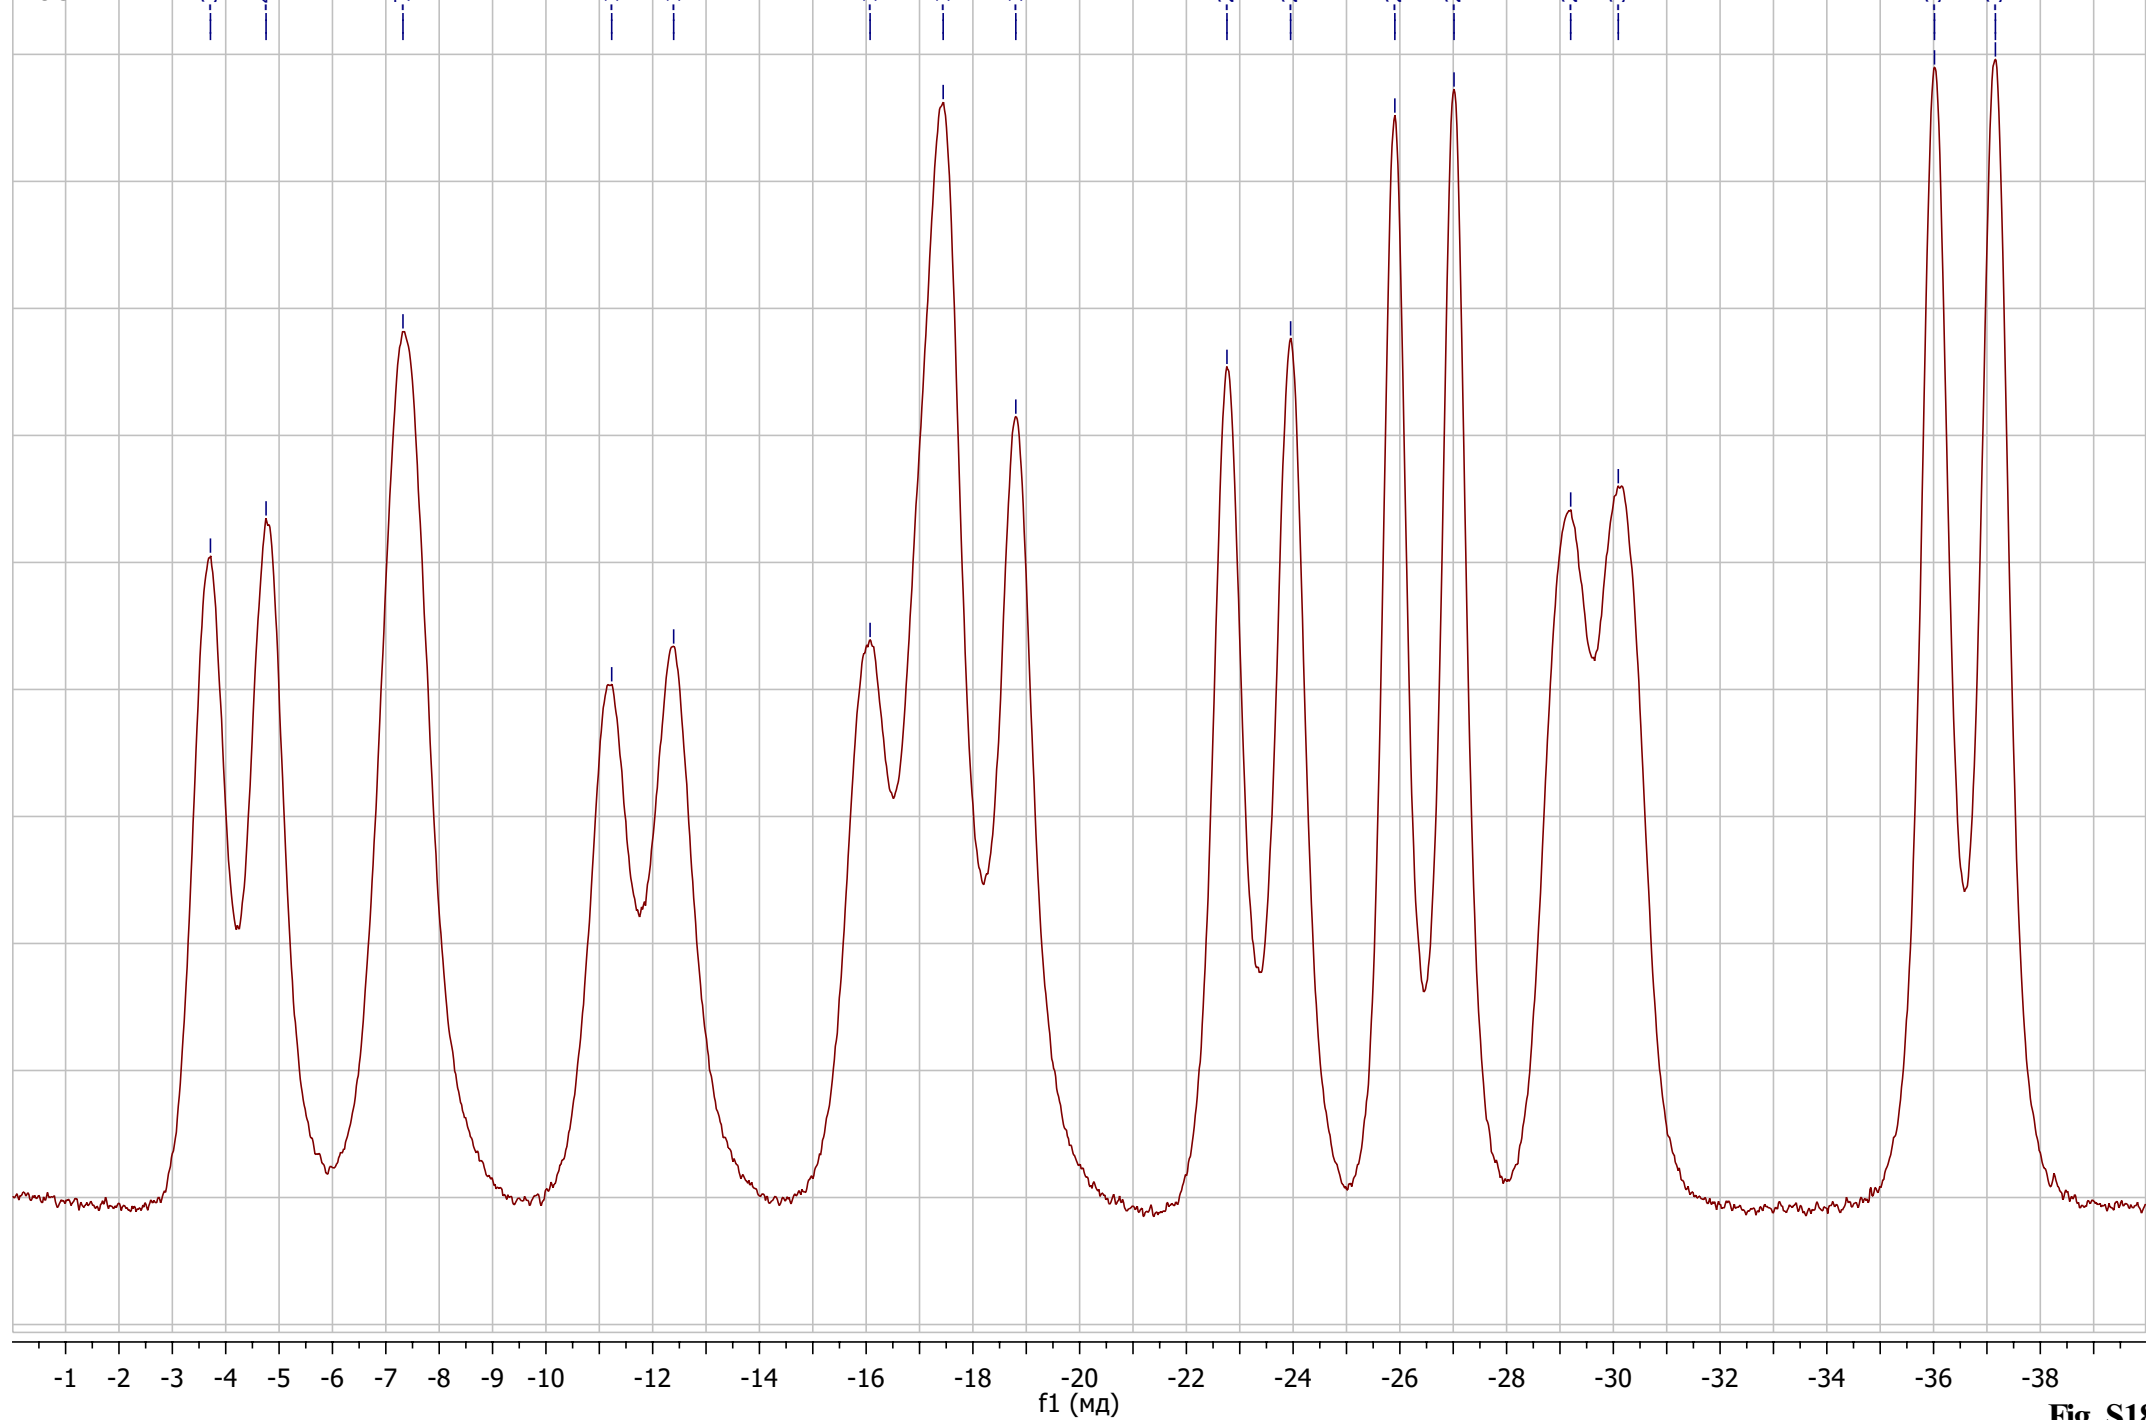

Fig. S18

semi2203-2011

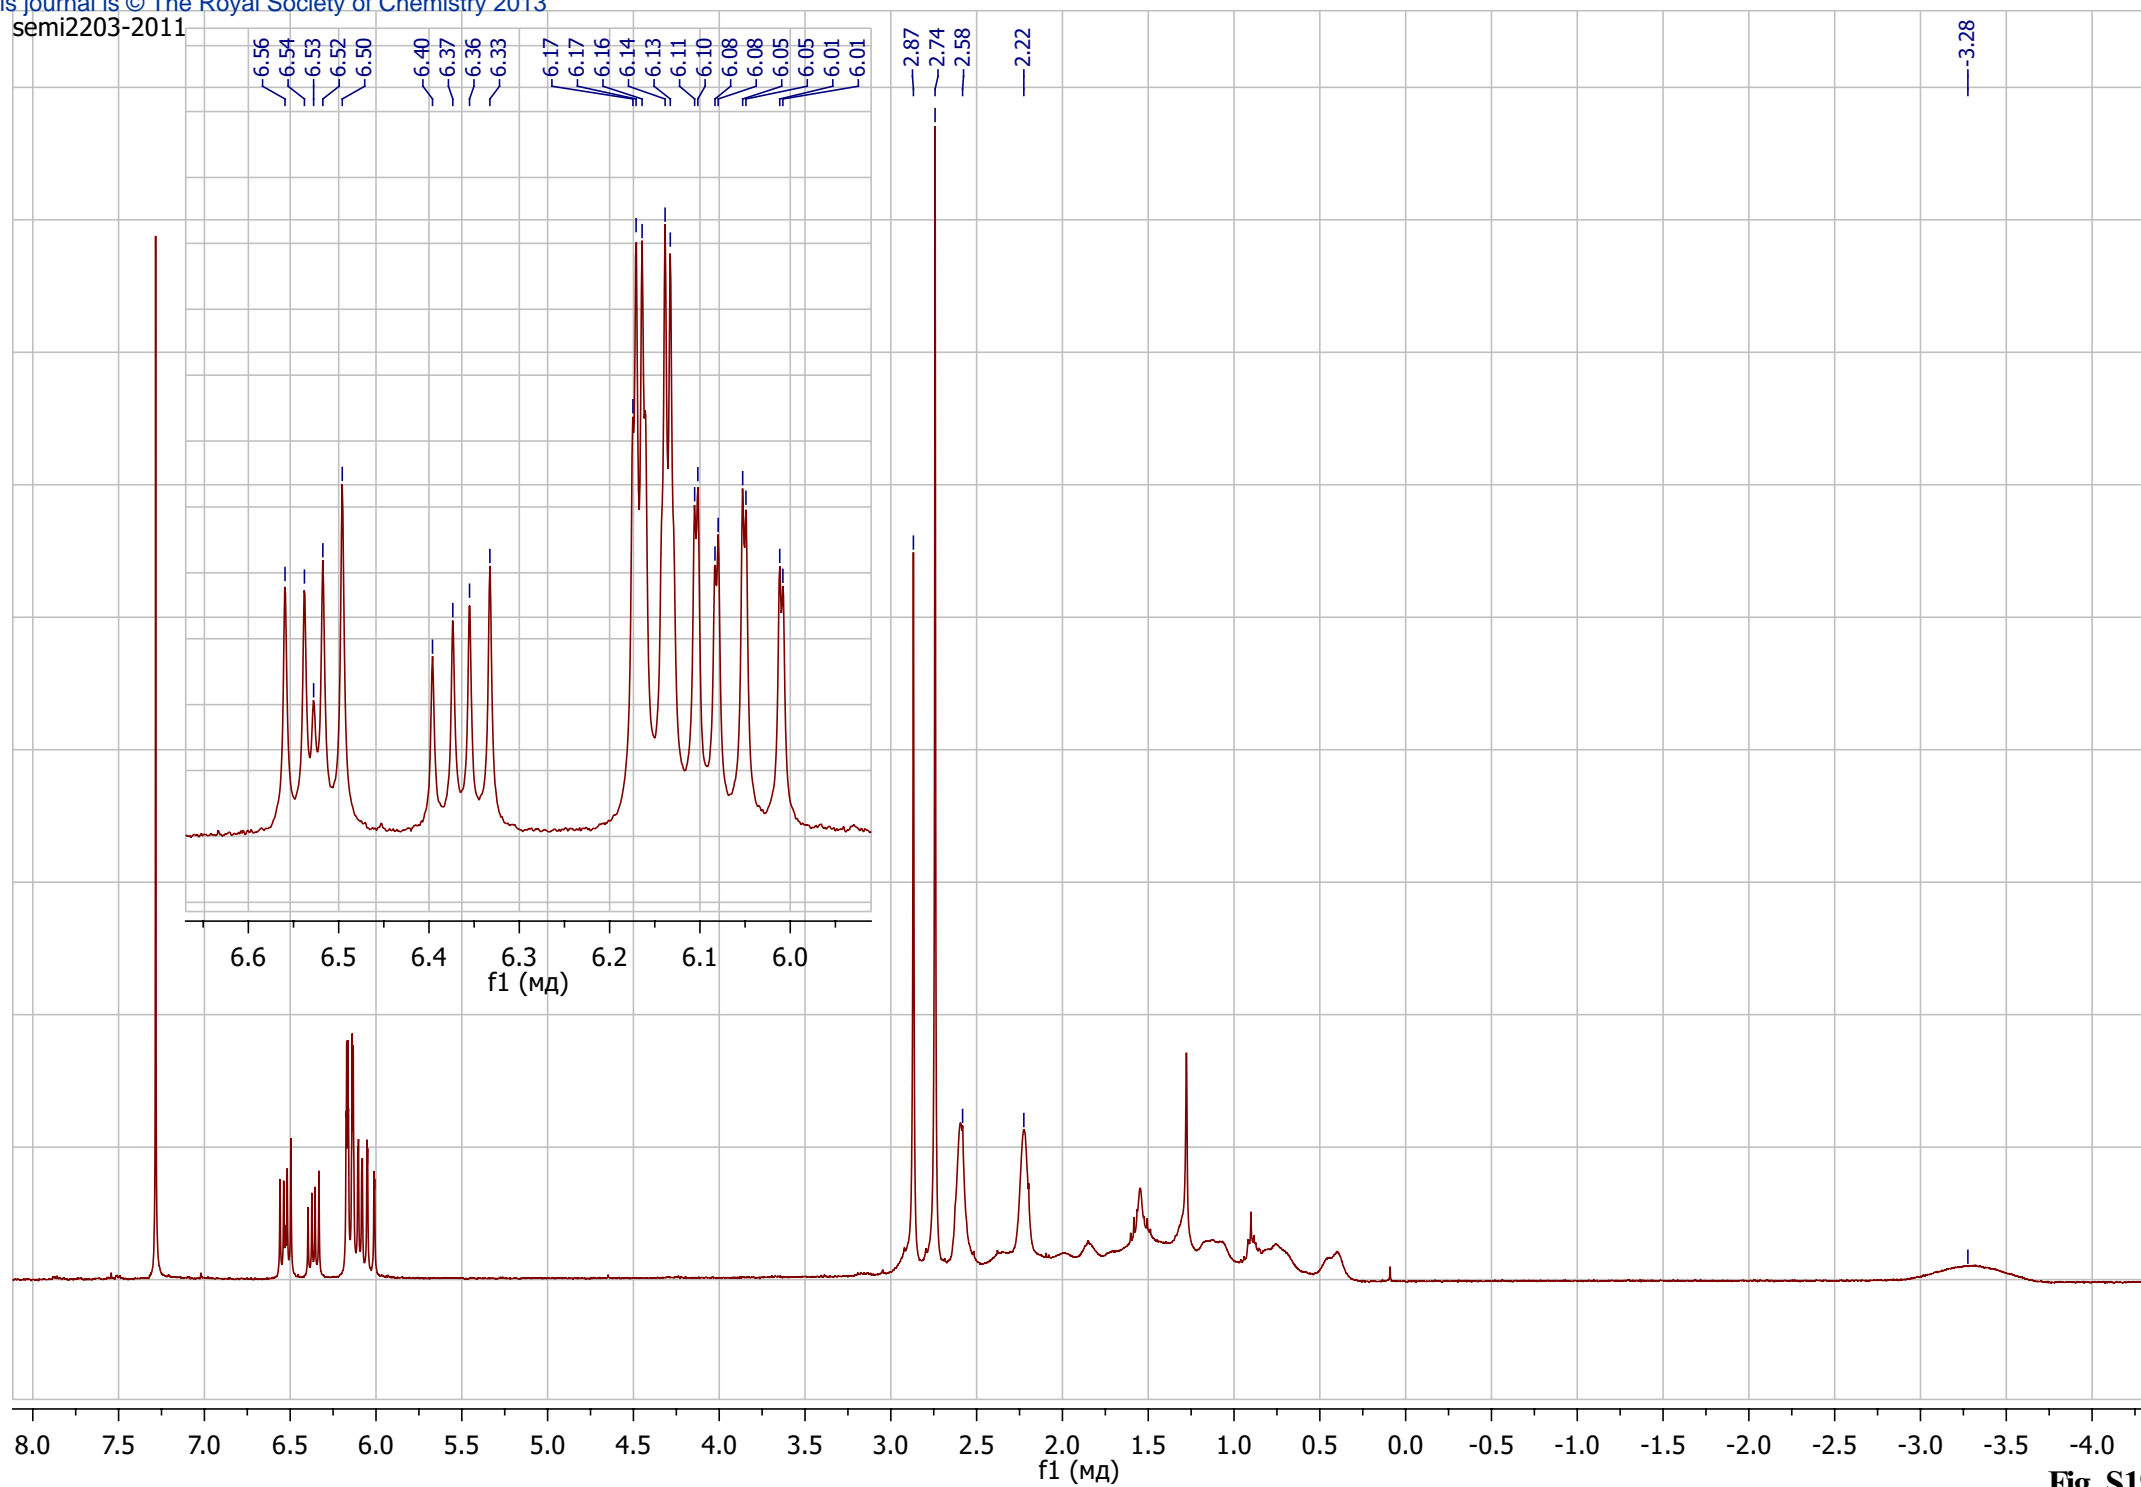

Fig. S19

semi1304-2011

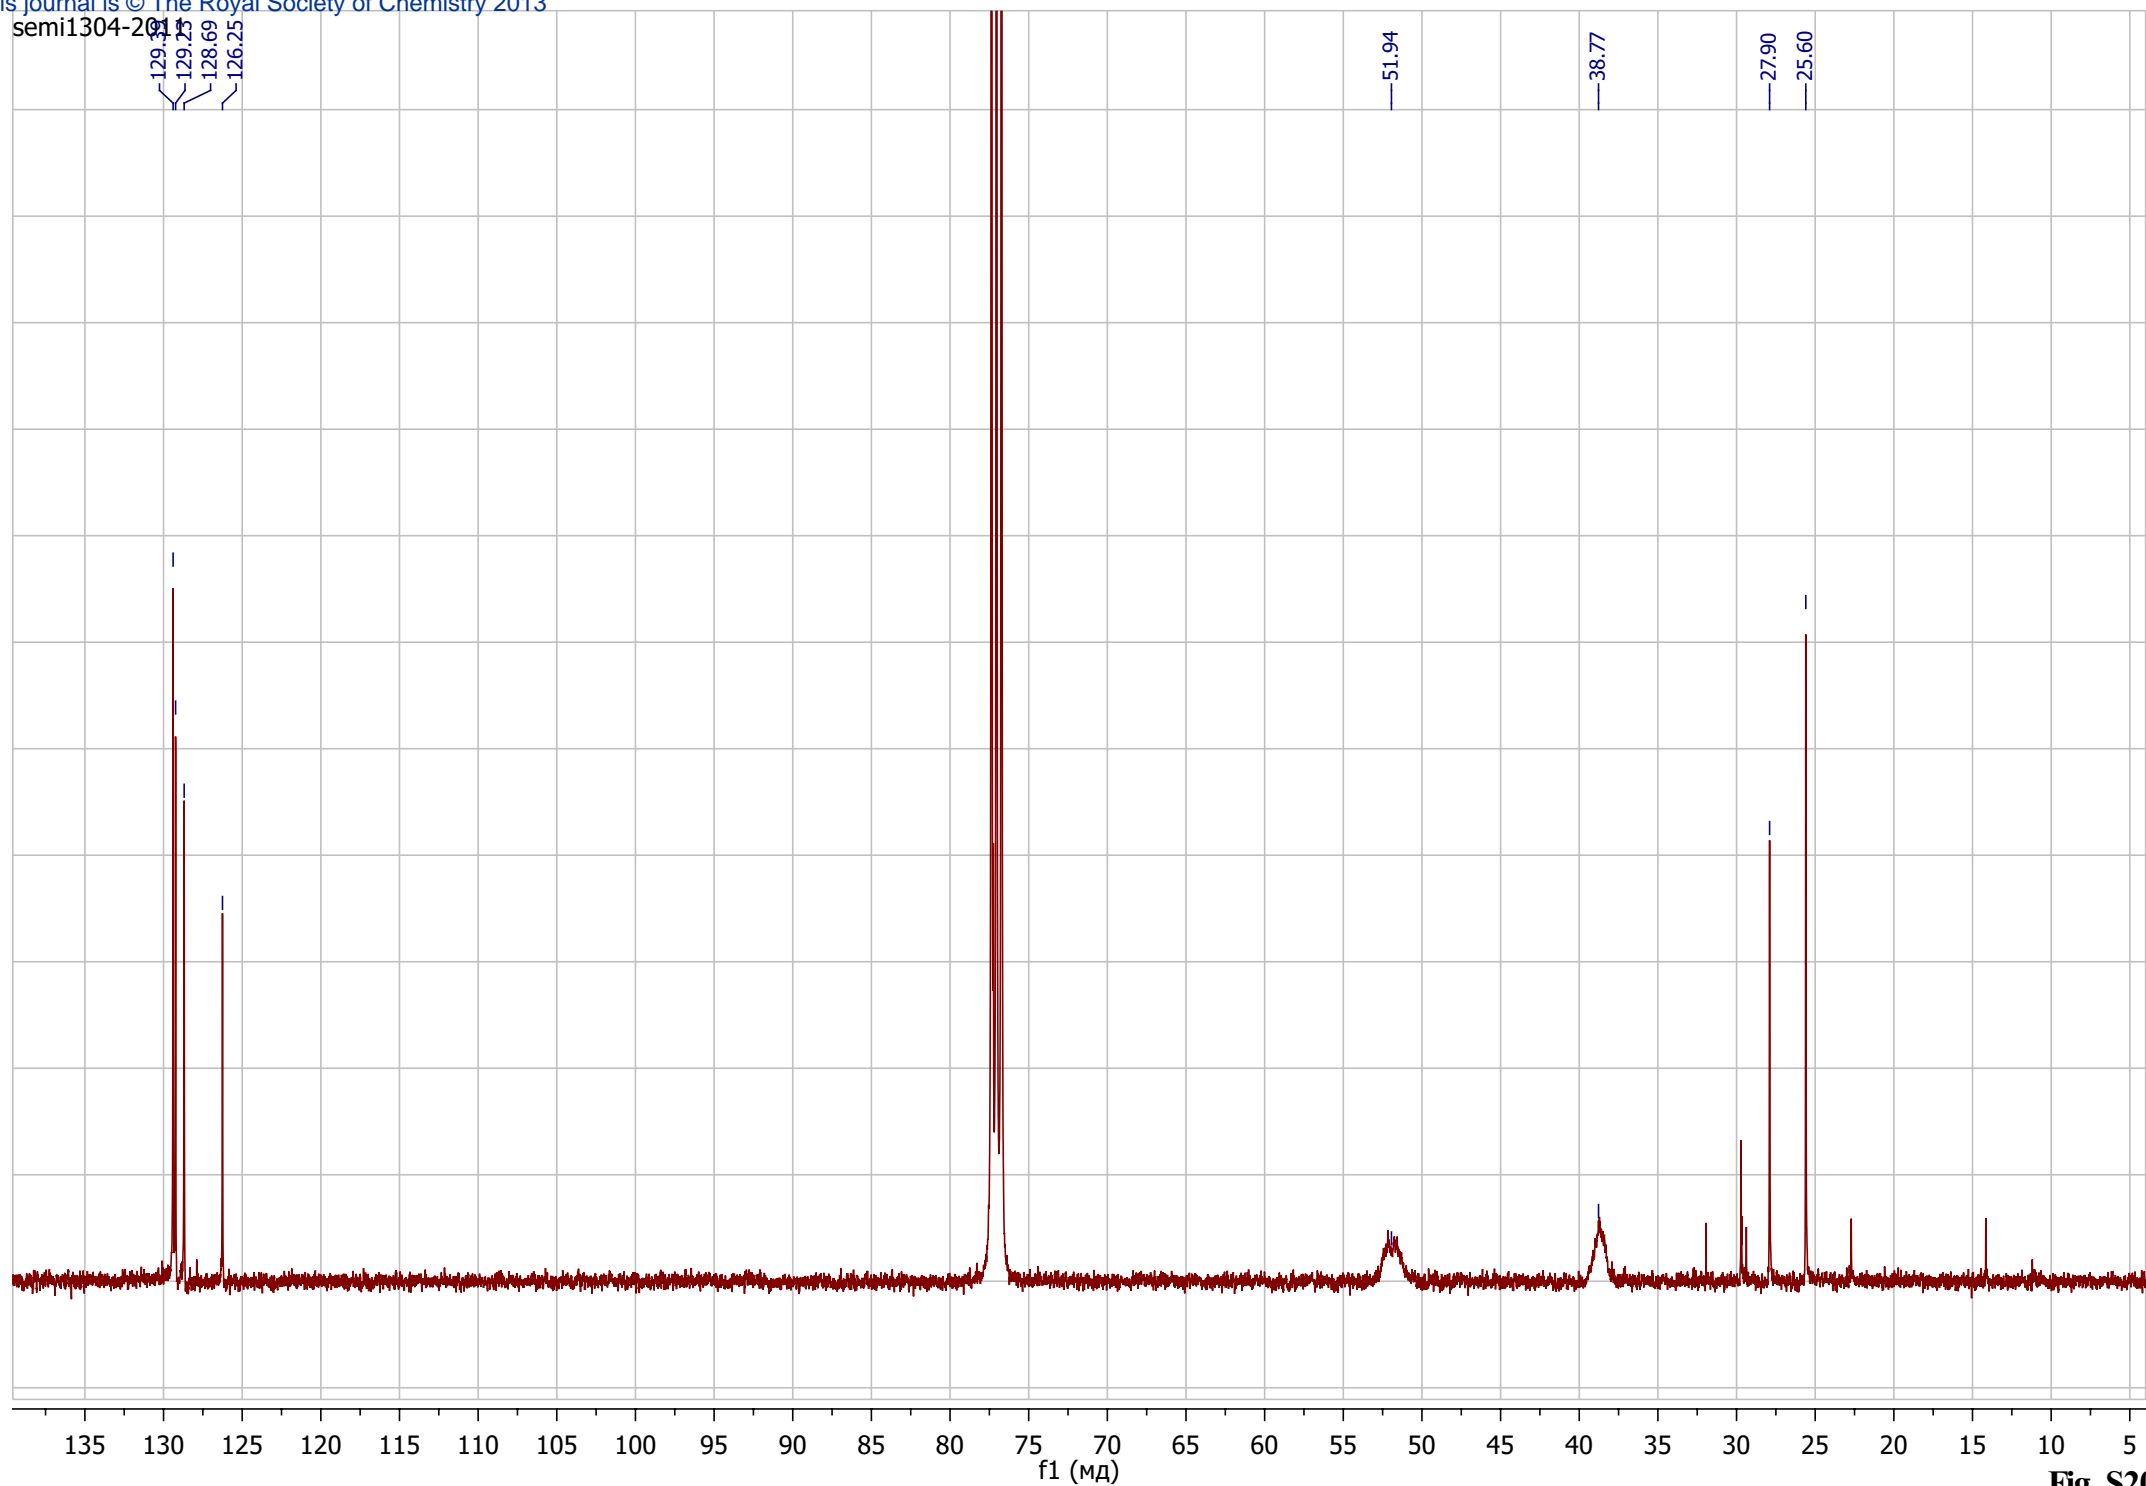

Fig. S20

semi2203-2011  
F19CPD

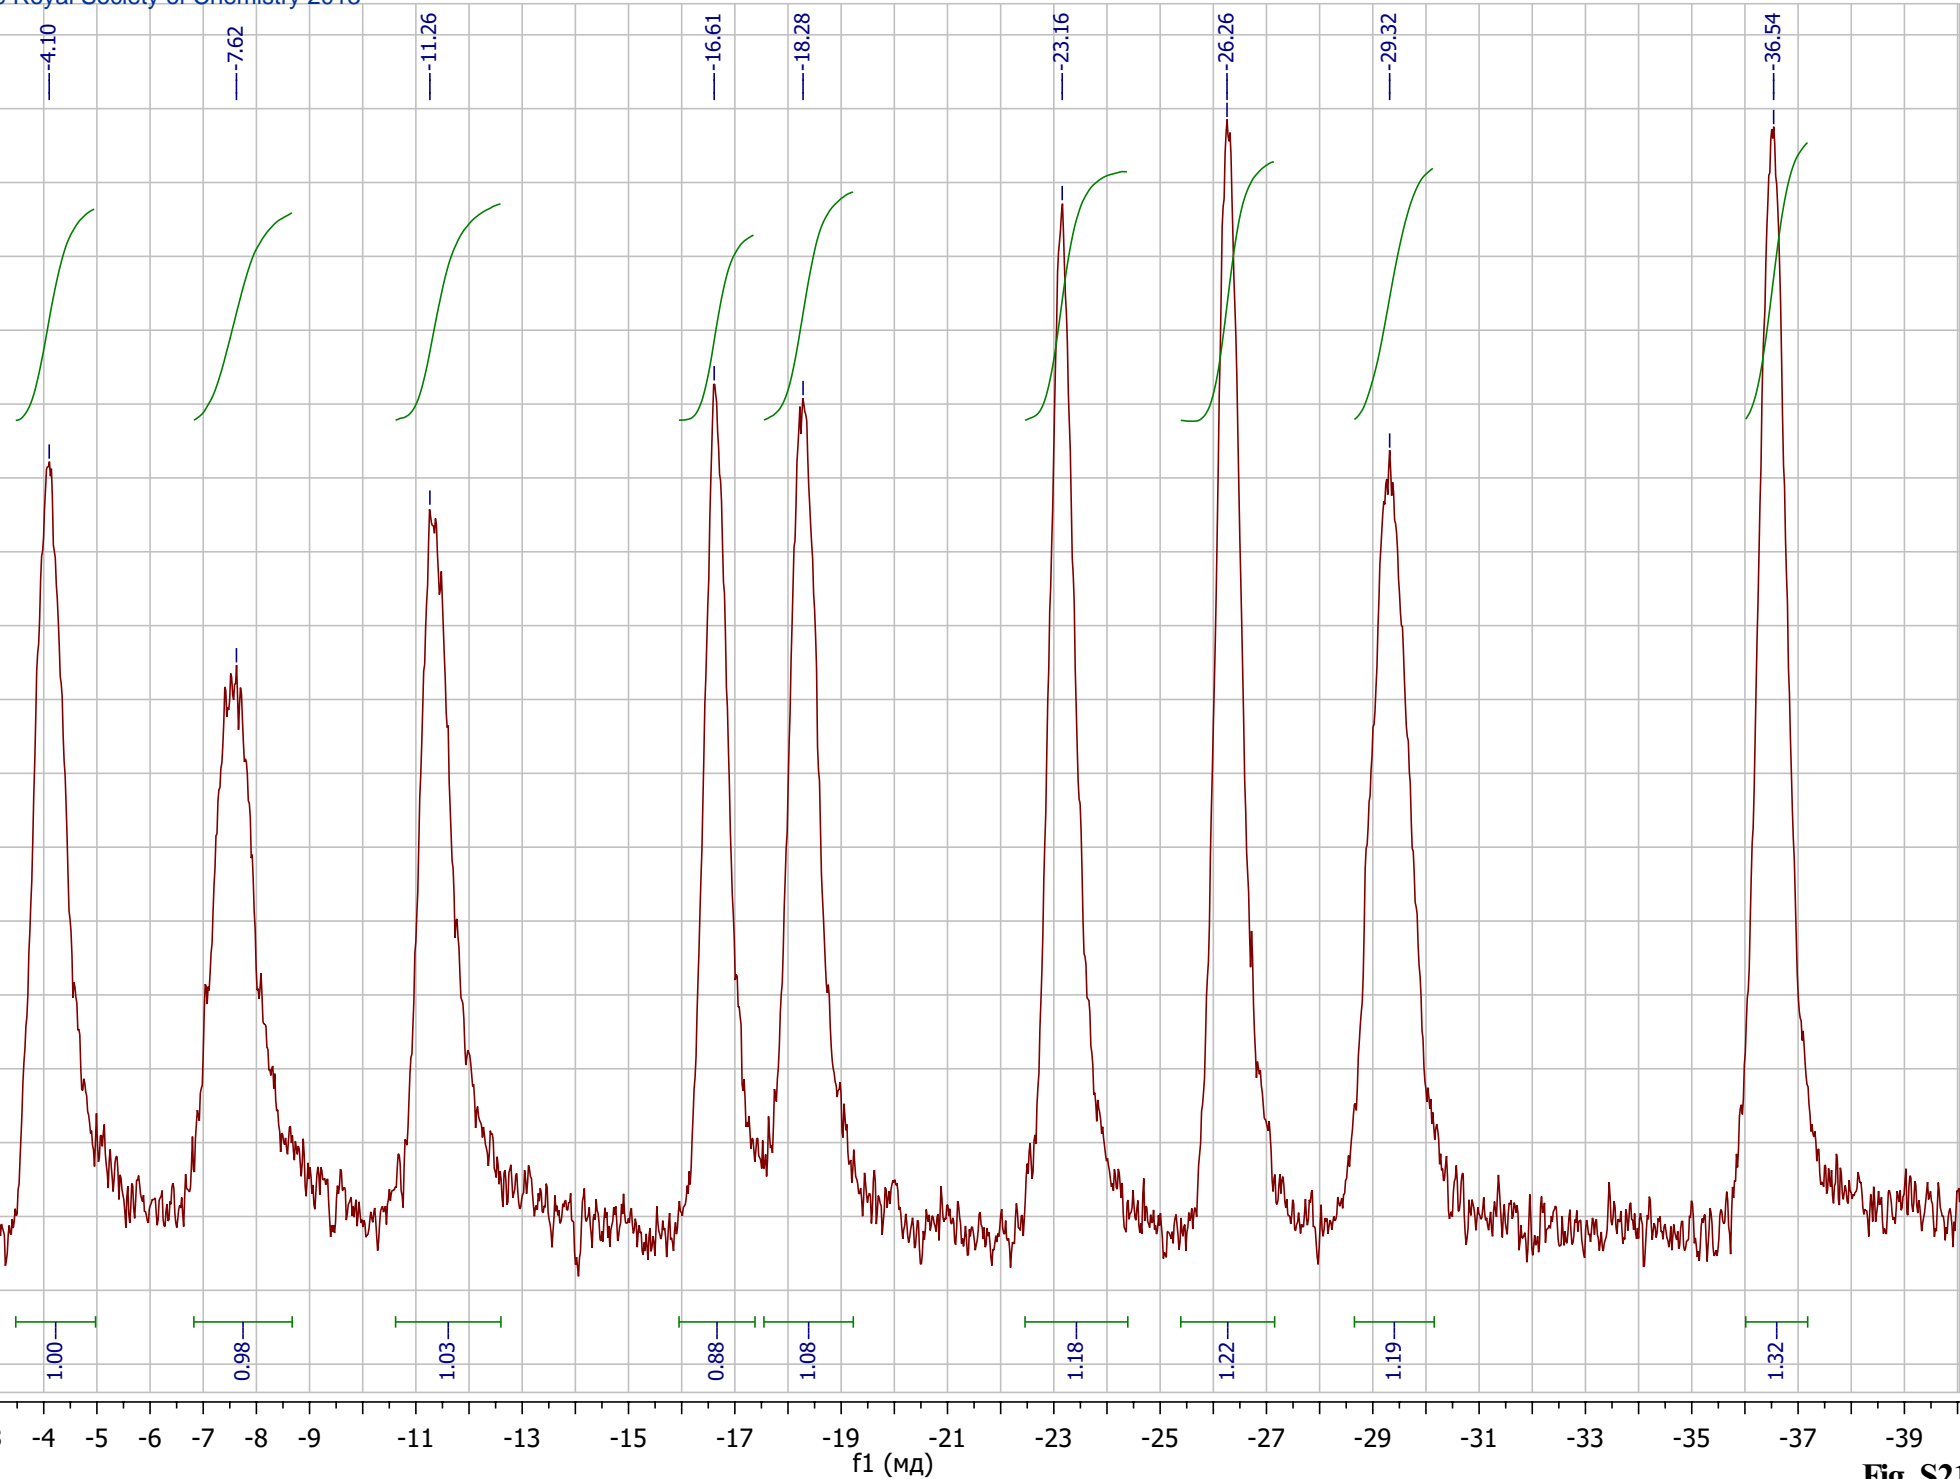

Fig. S21

semi2203-2011  
F19CPD

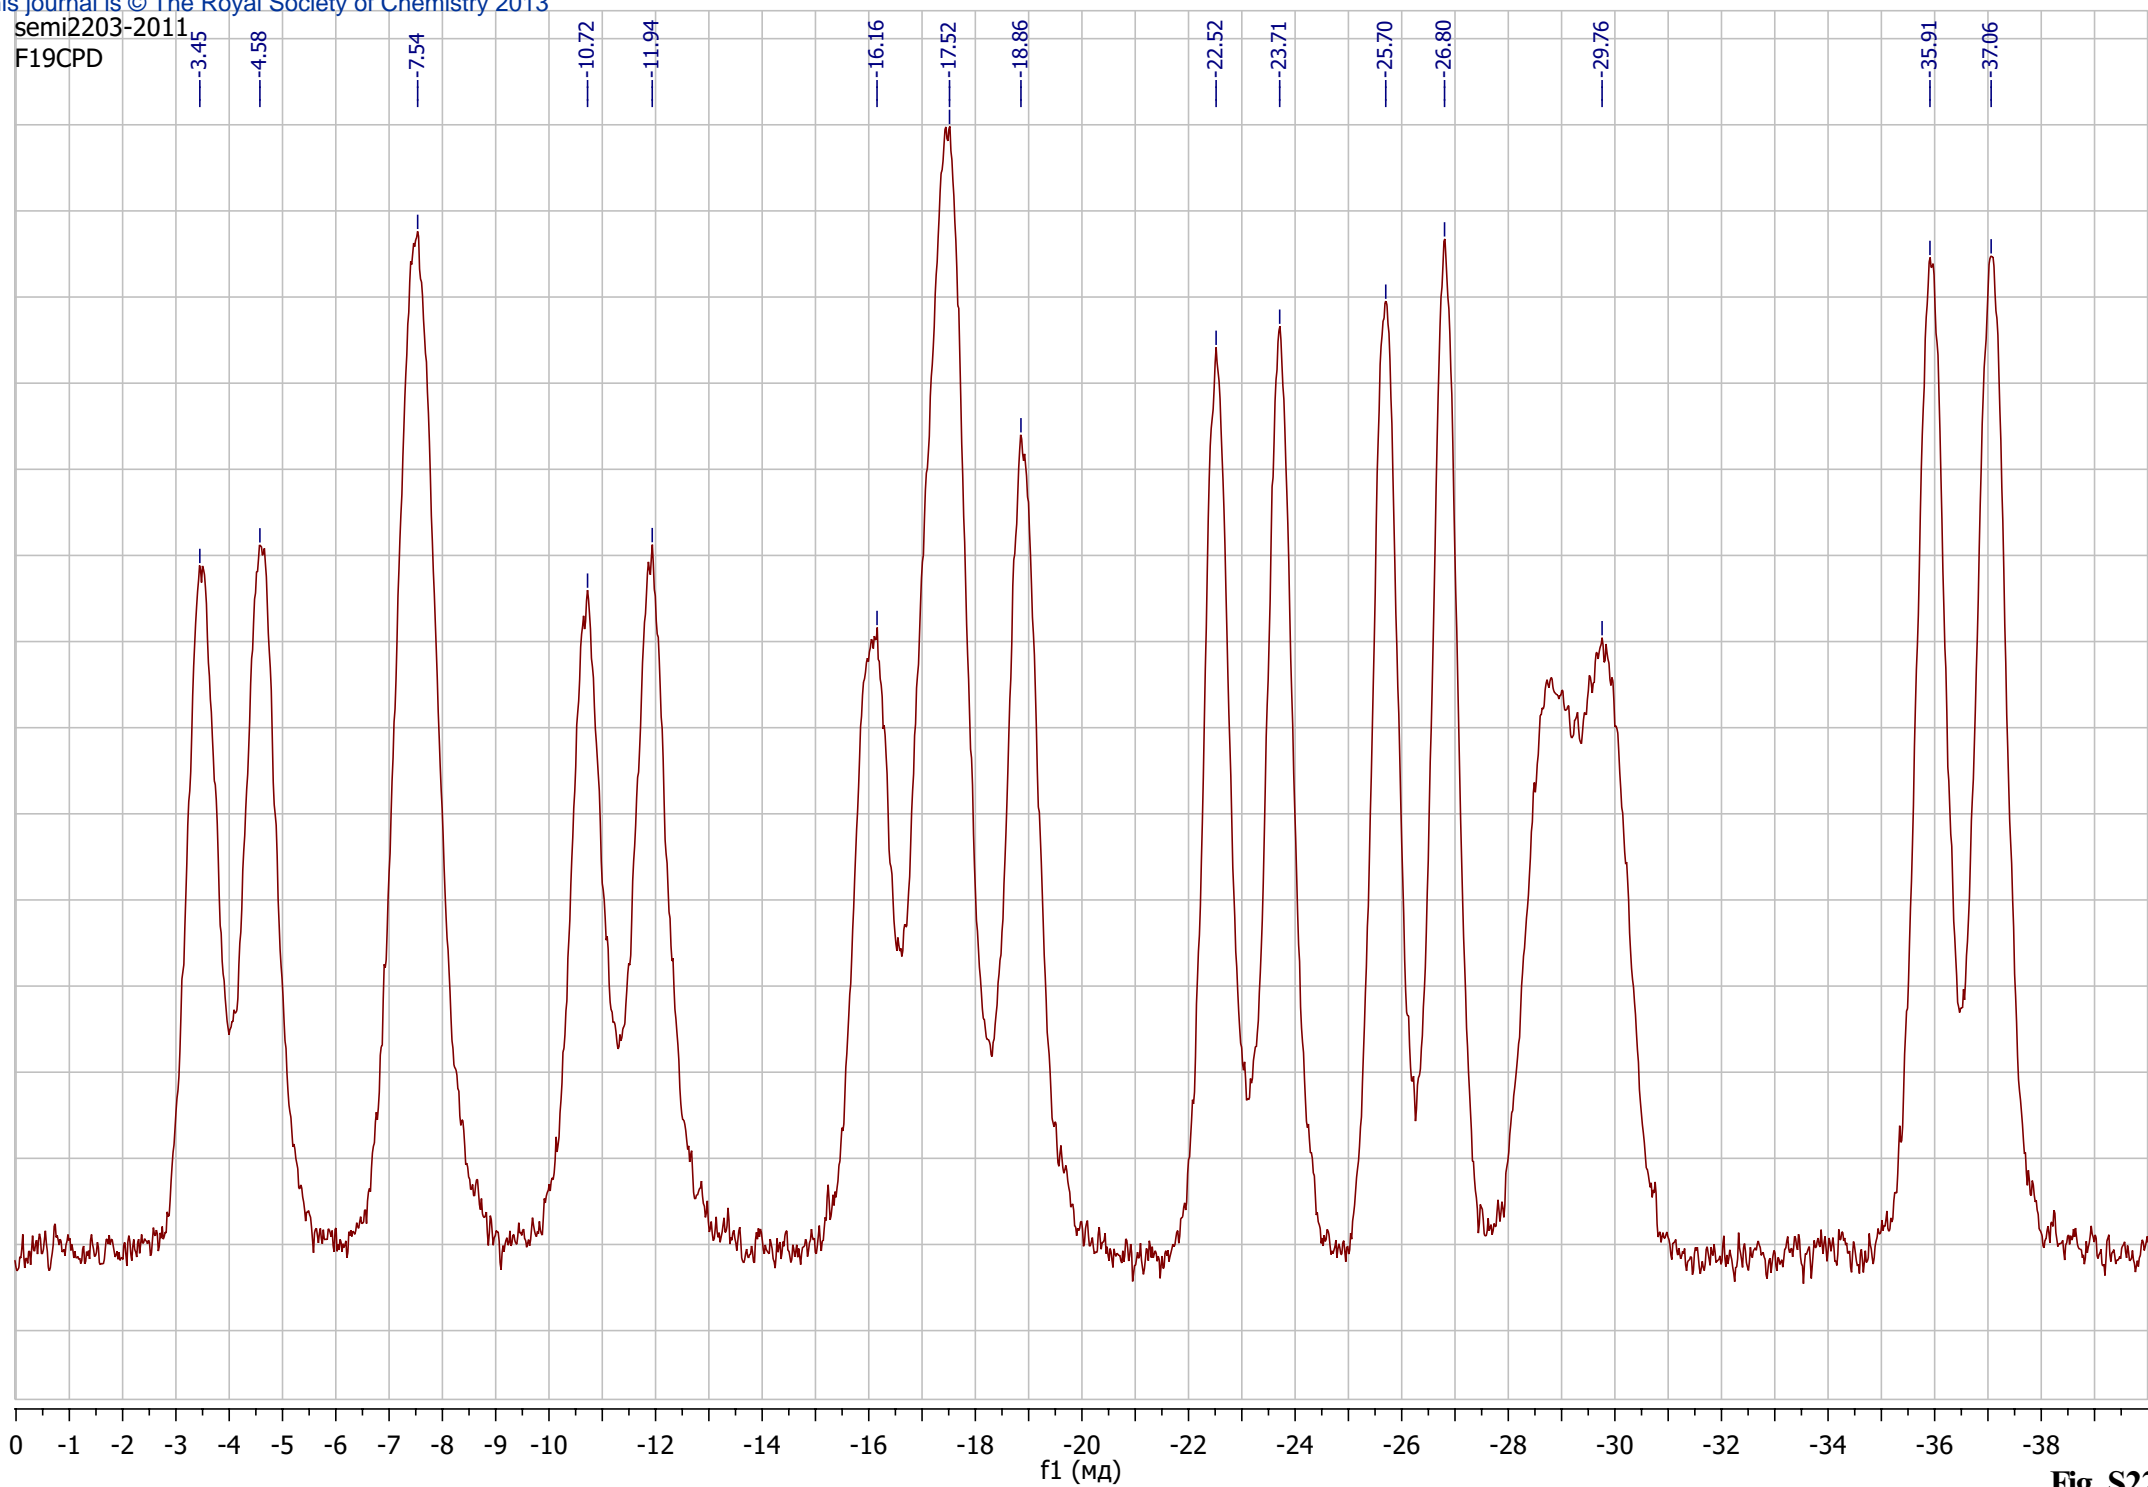

Fig. S22



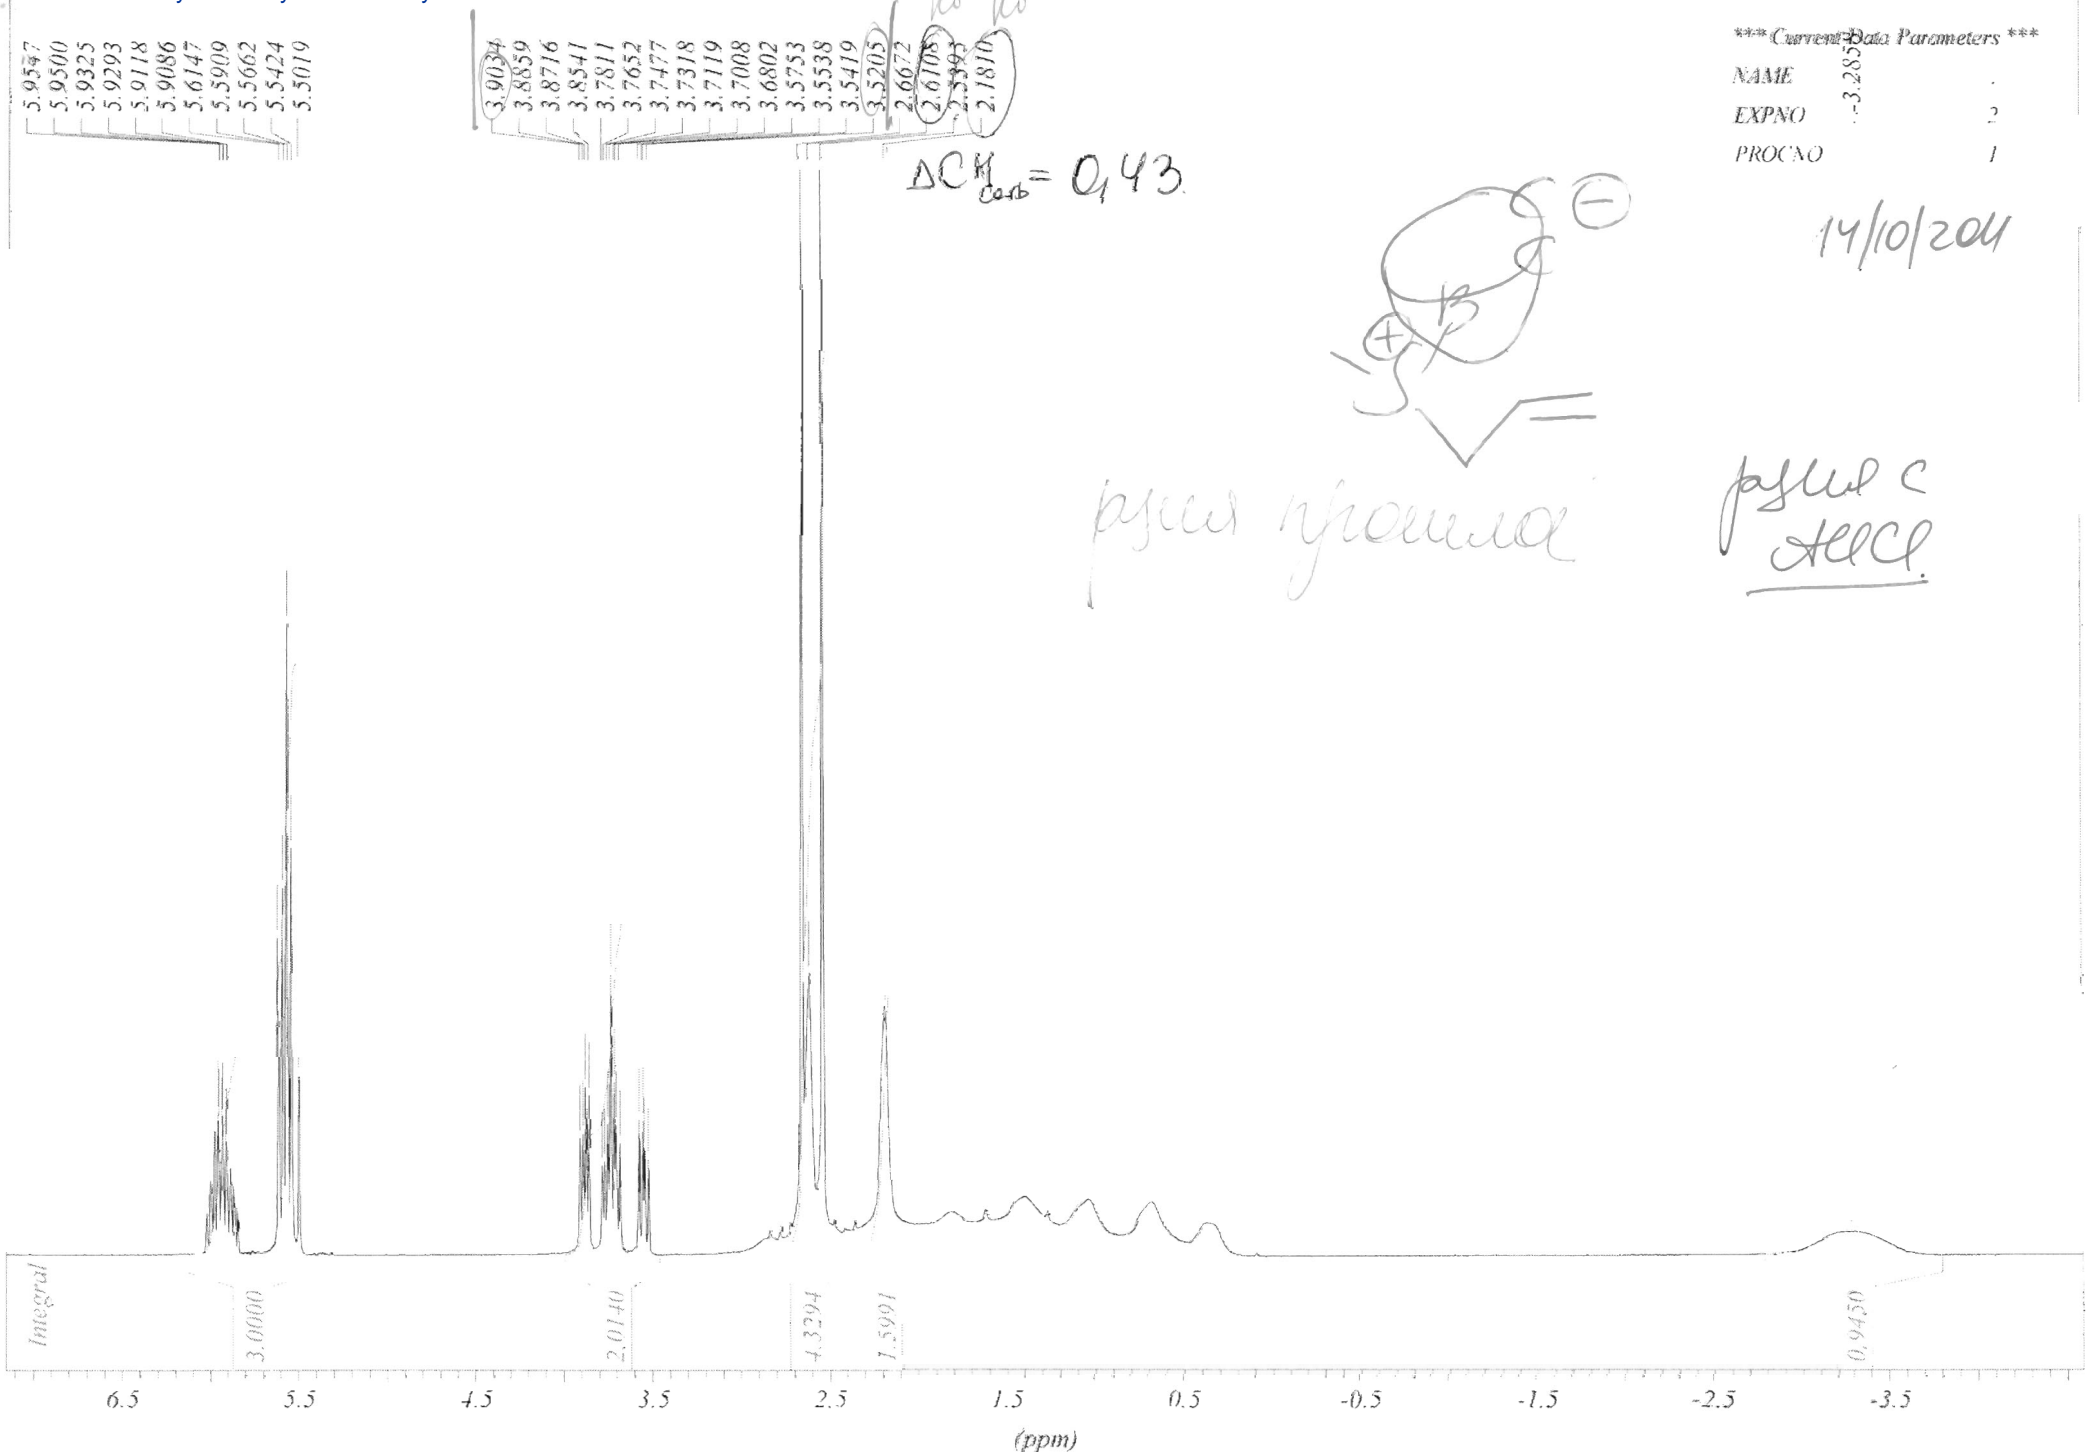

\*\*\* Current Data Parameters \*\*\*

NAME  
EXPNO 211  
PROCNO 1

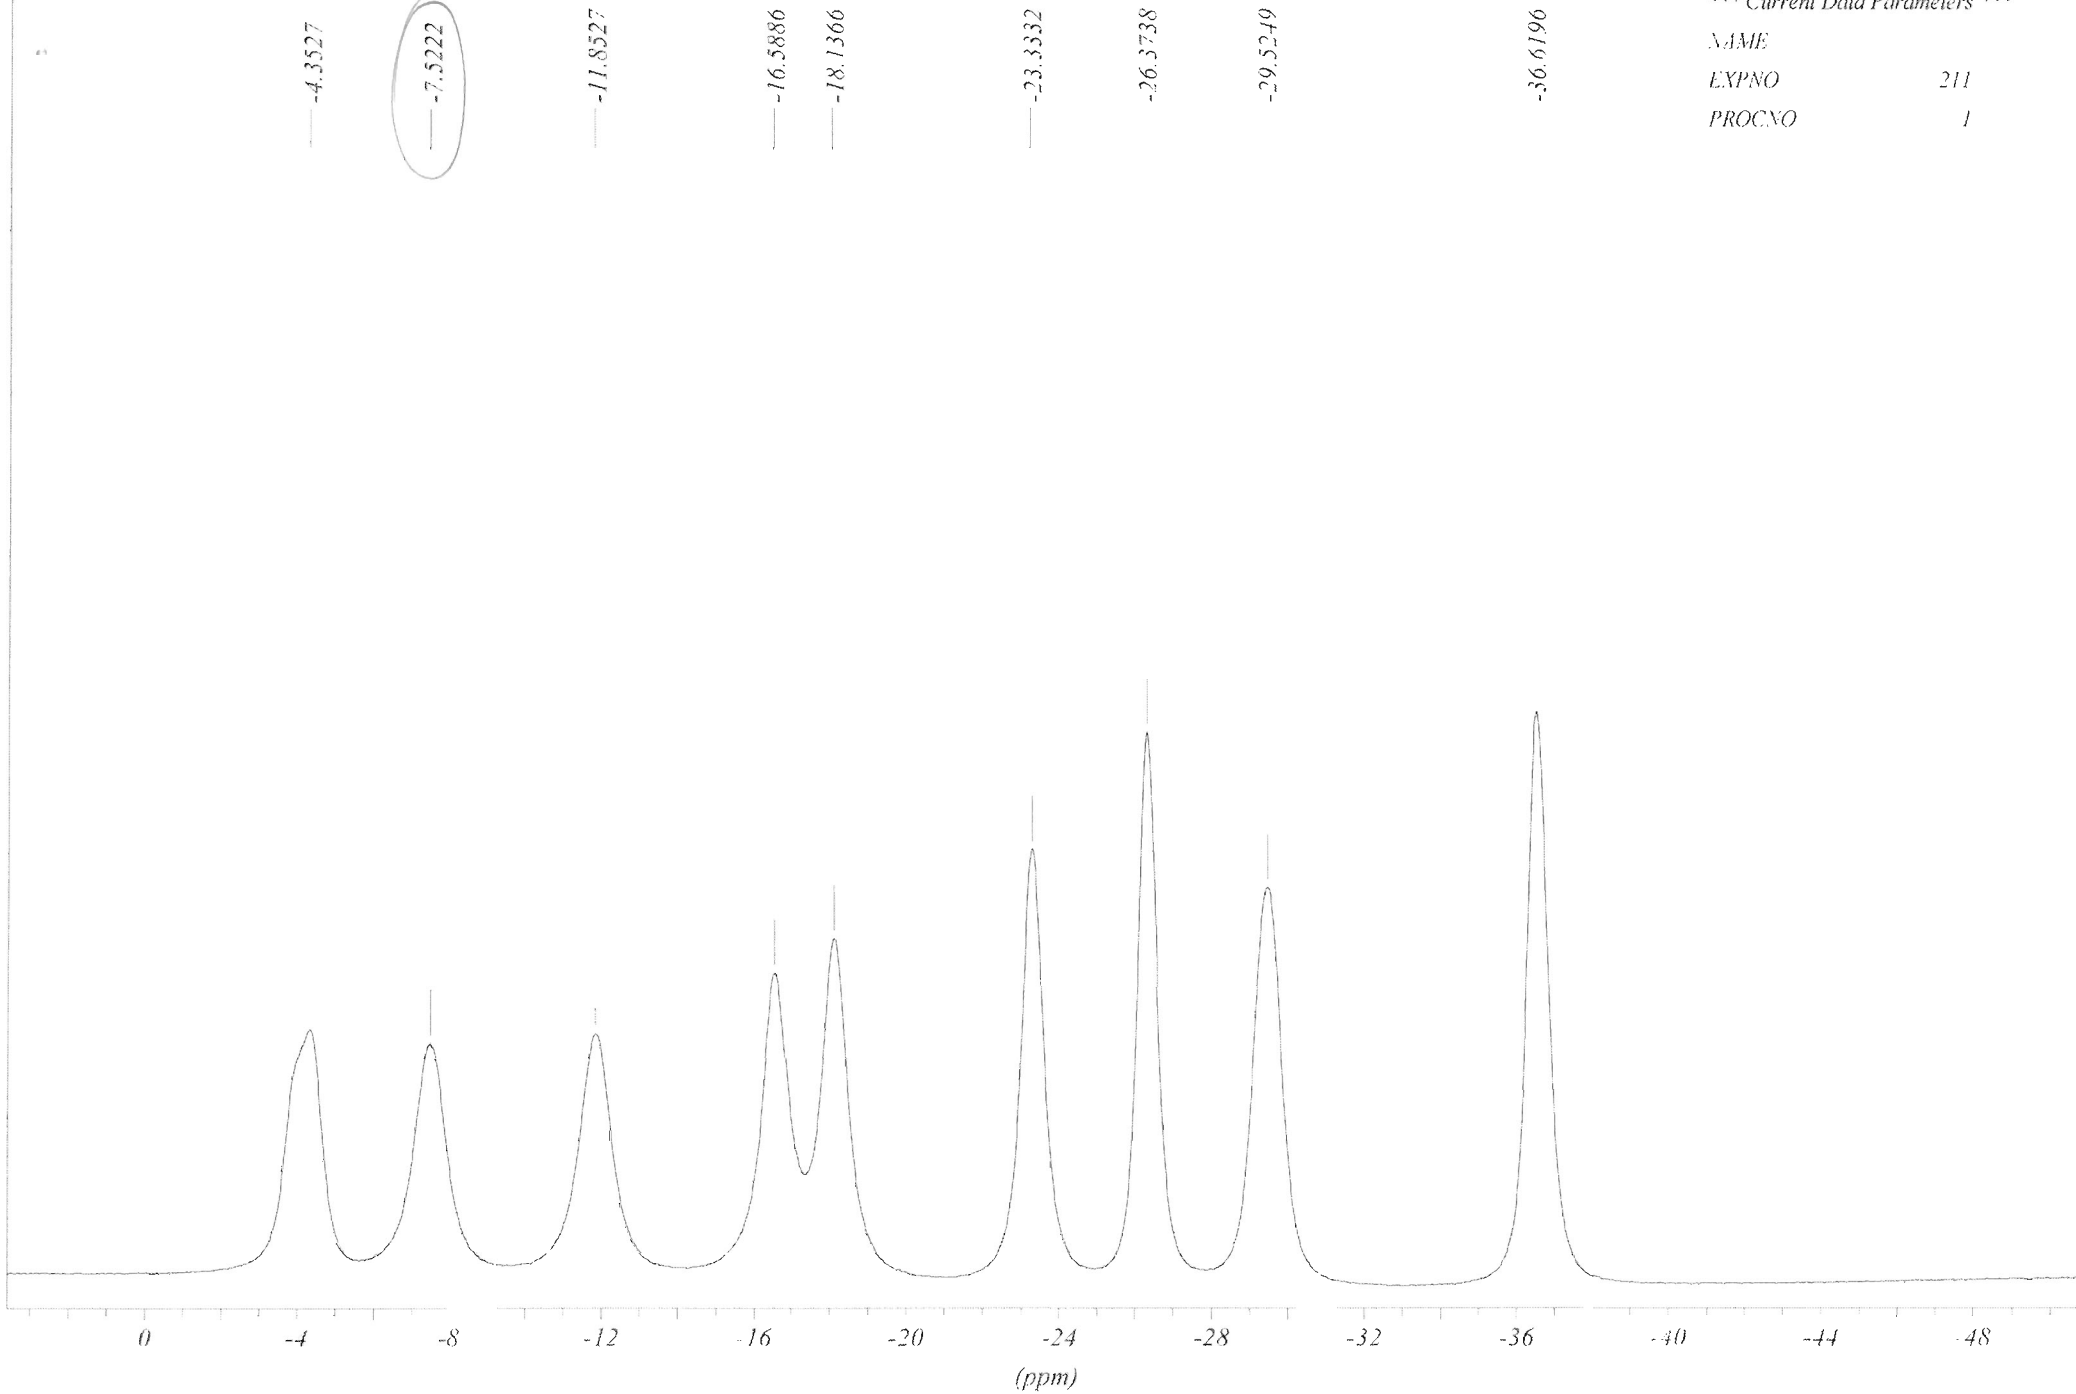

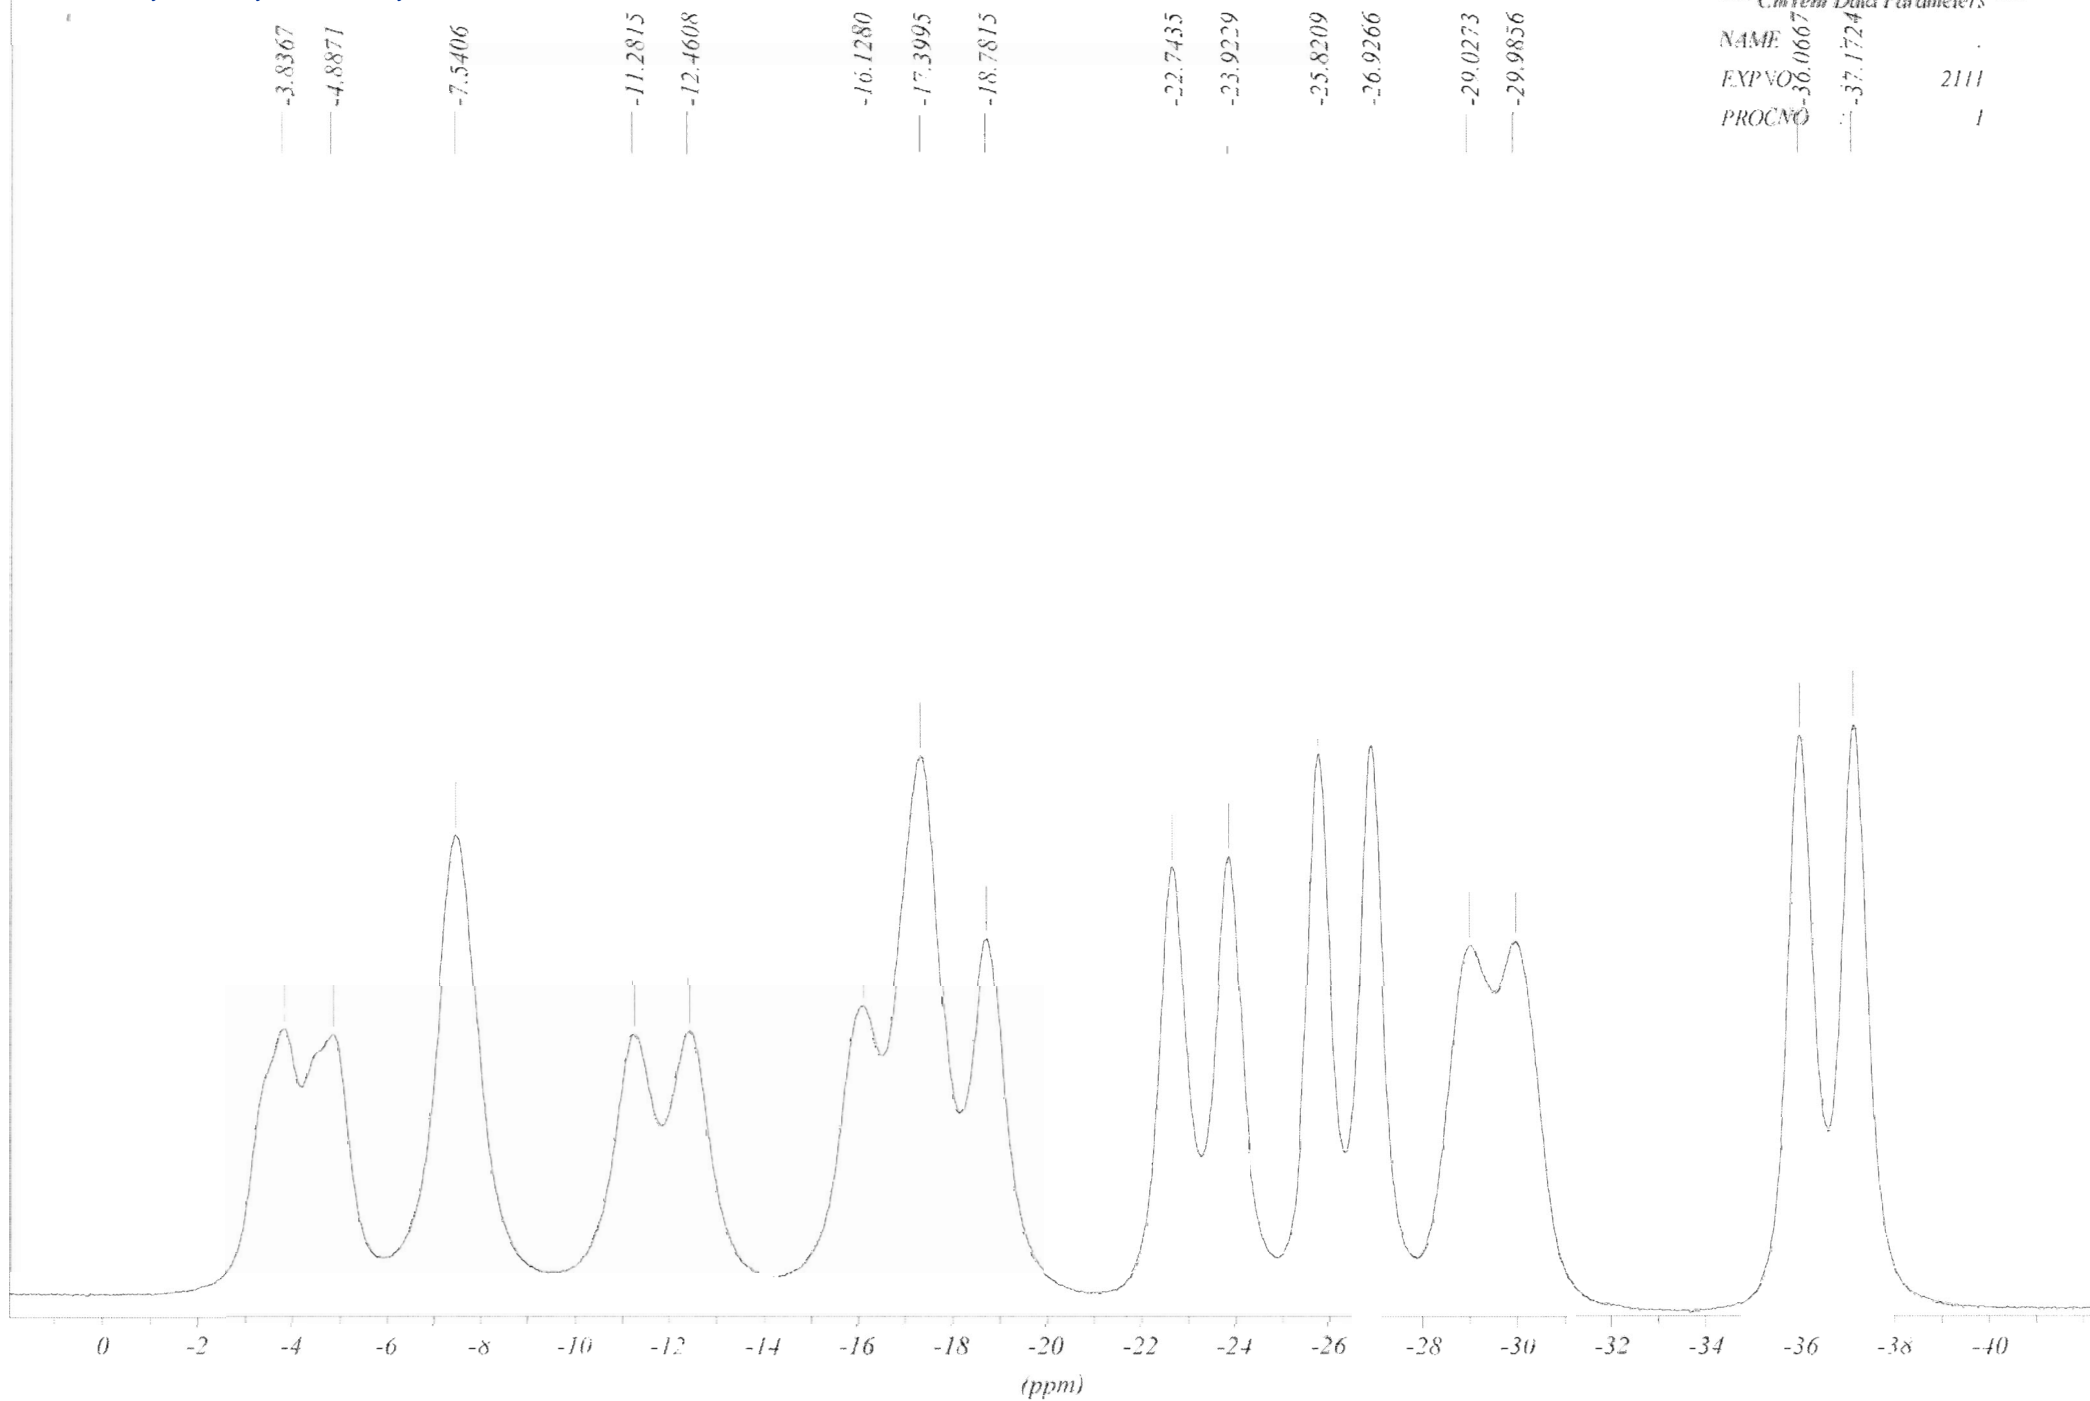

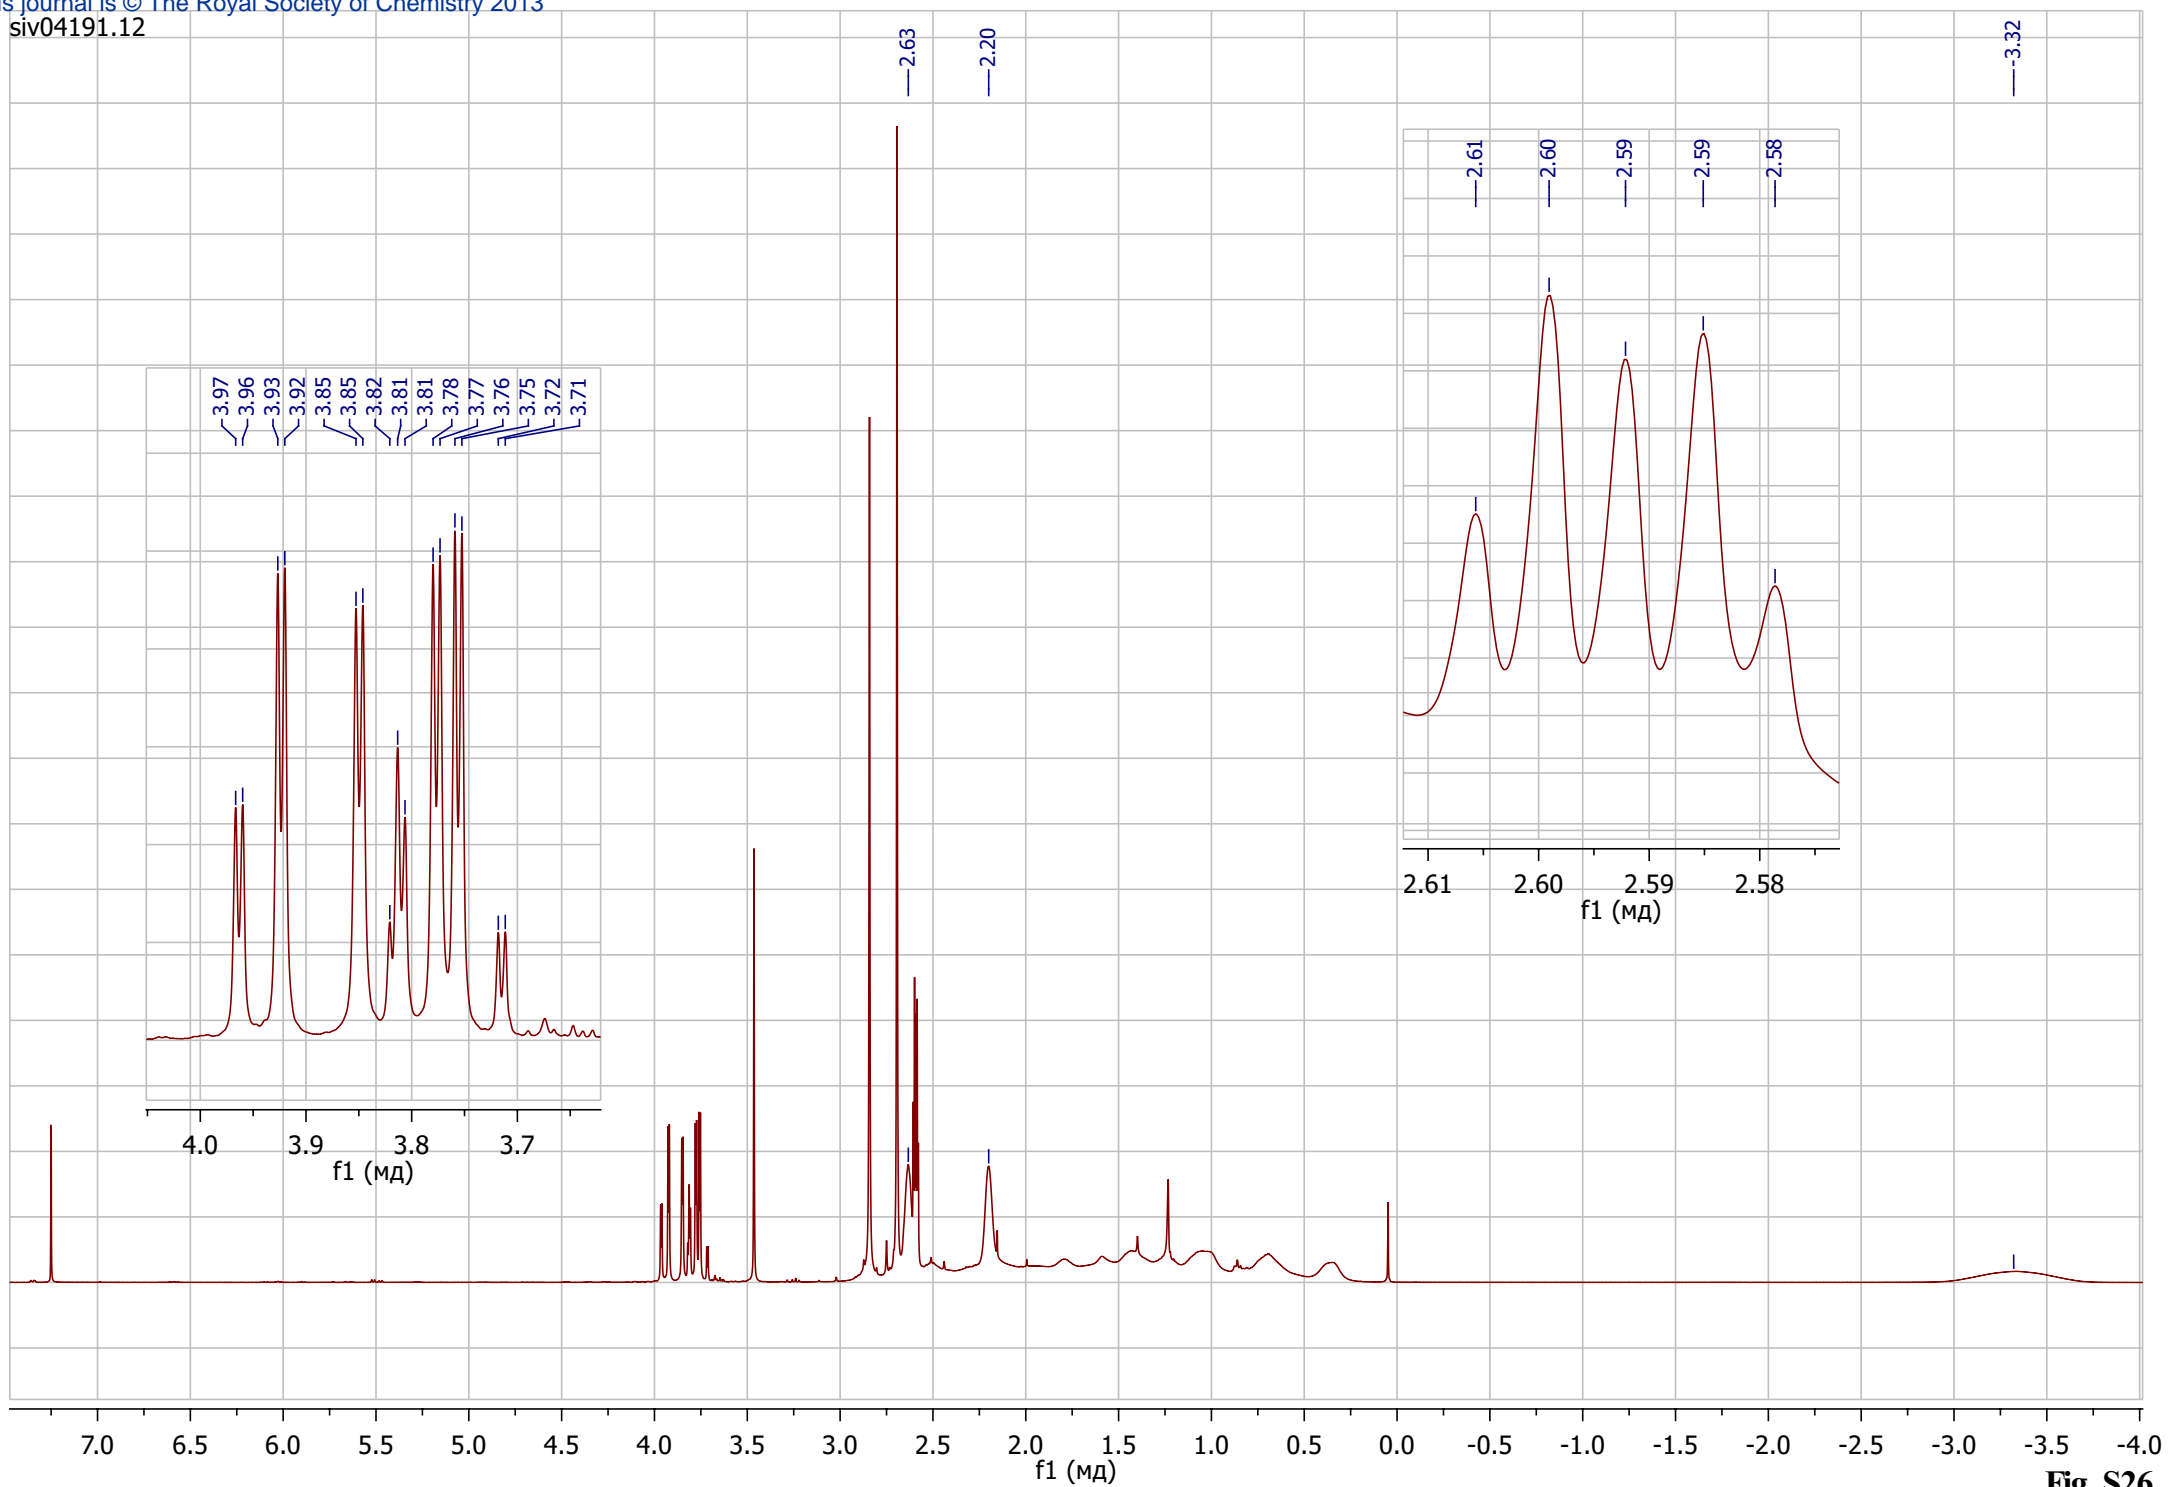

**Fig. S26**

siv03162.12

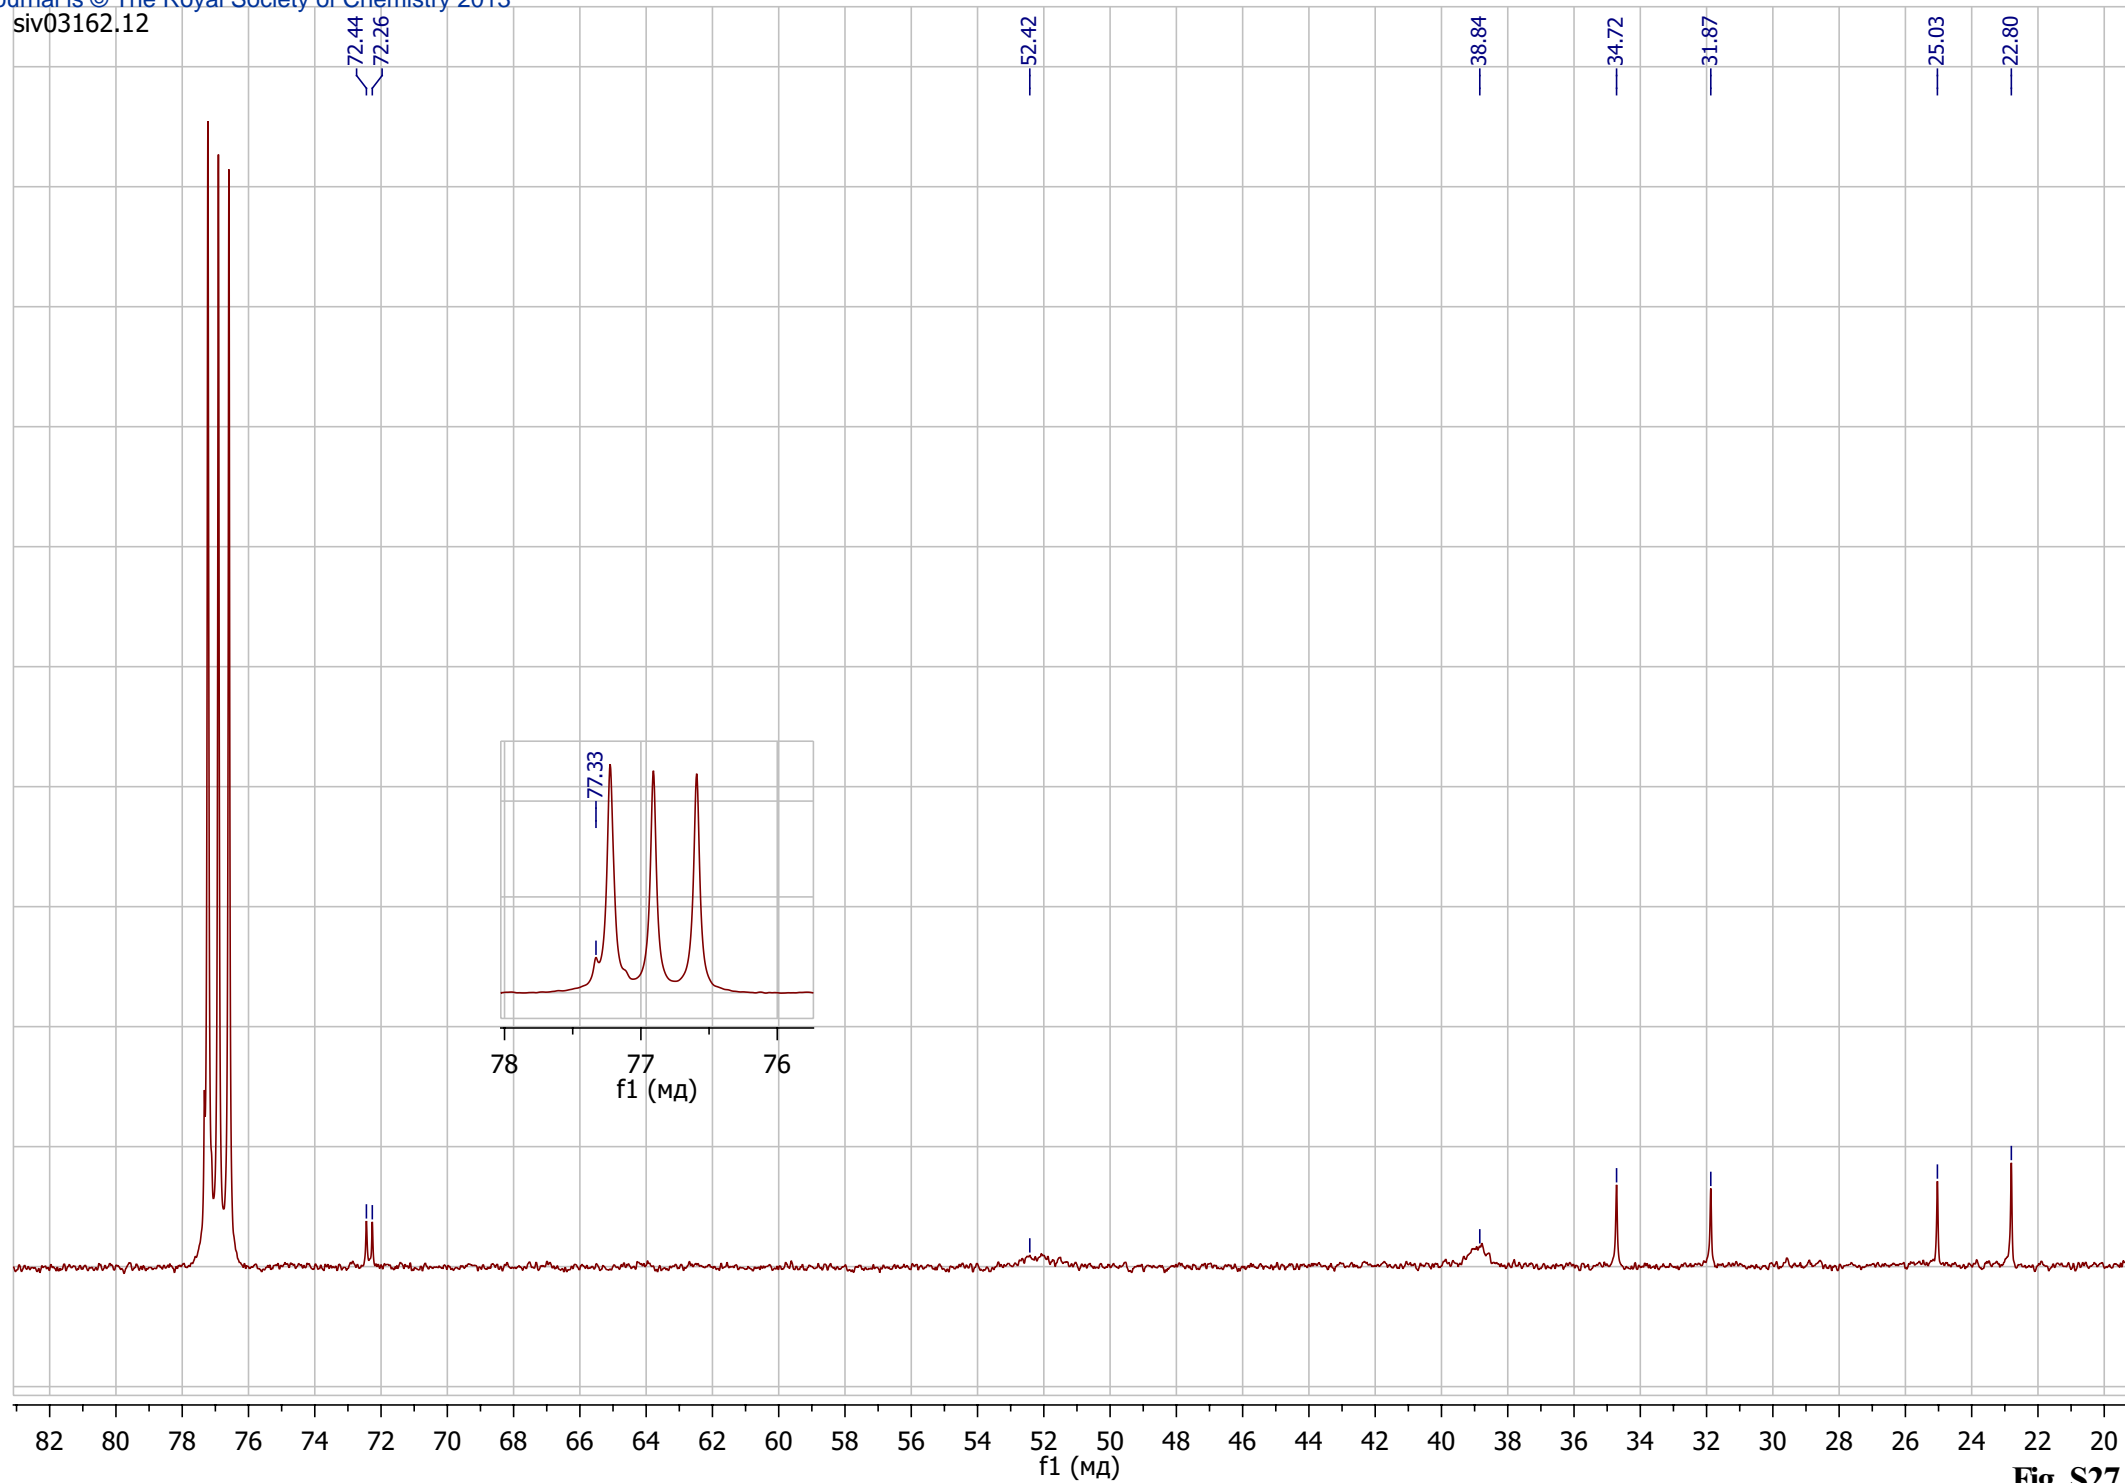

Fig. S27

siv04191.12  
F19CPD

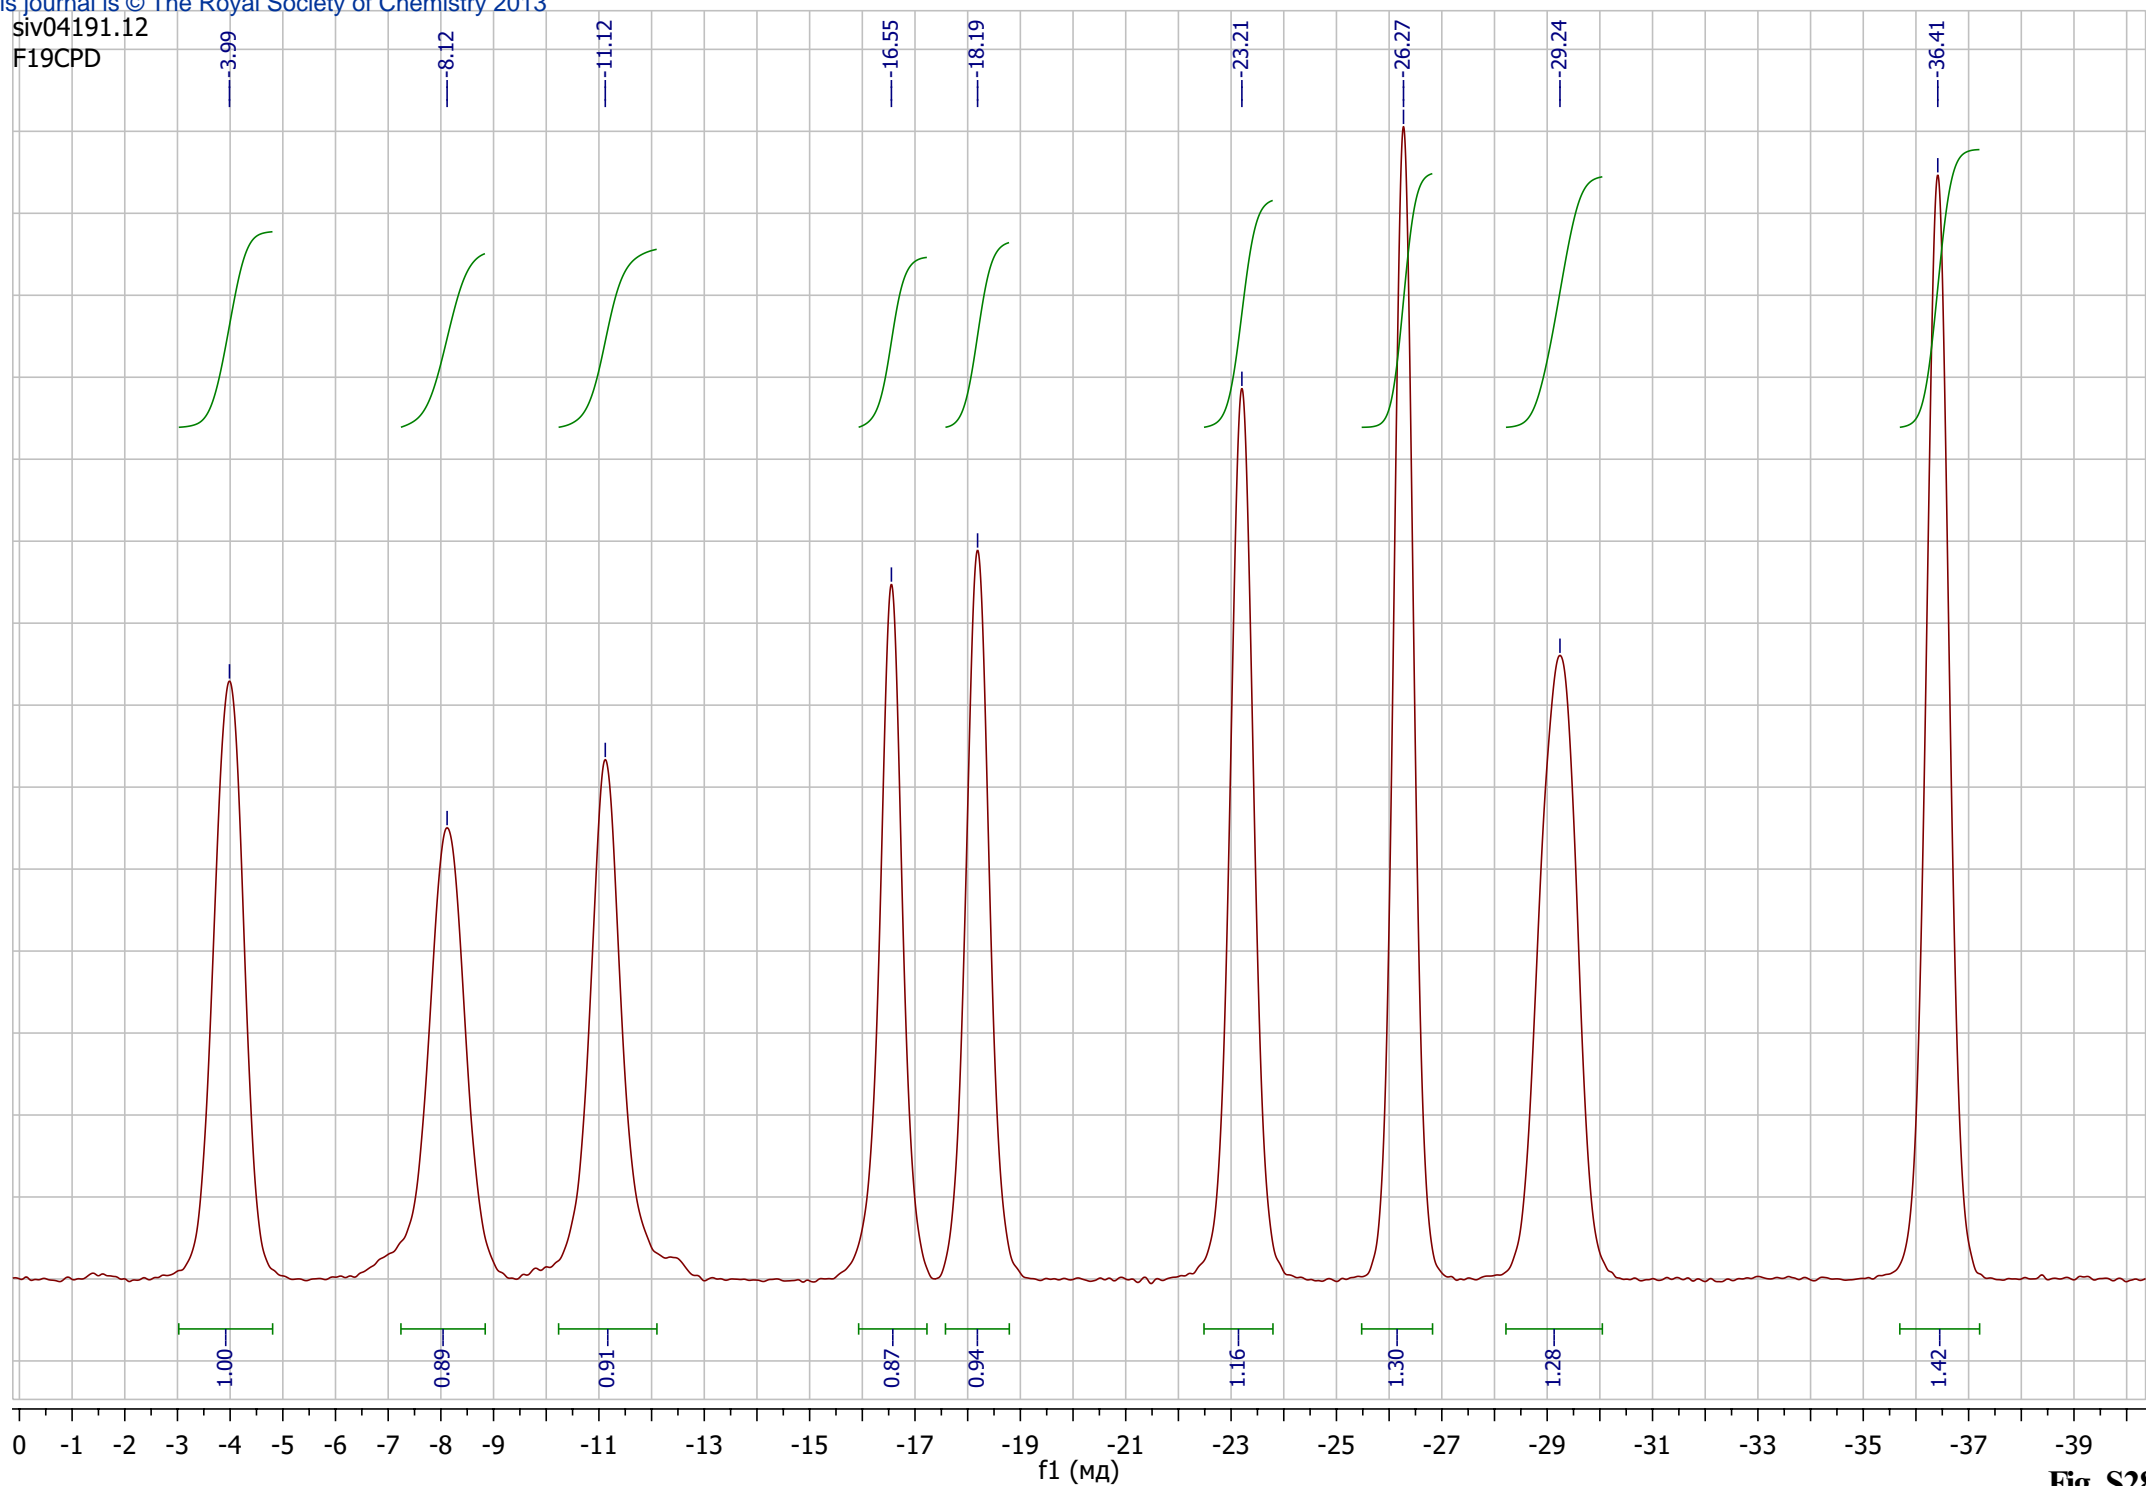

Fig. S28

siv04191.12  
F19CPD

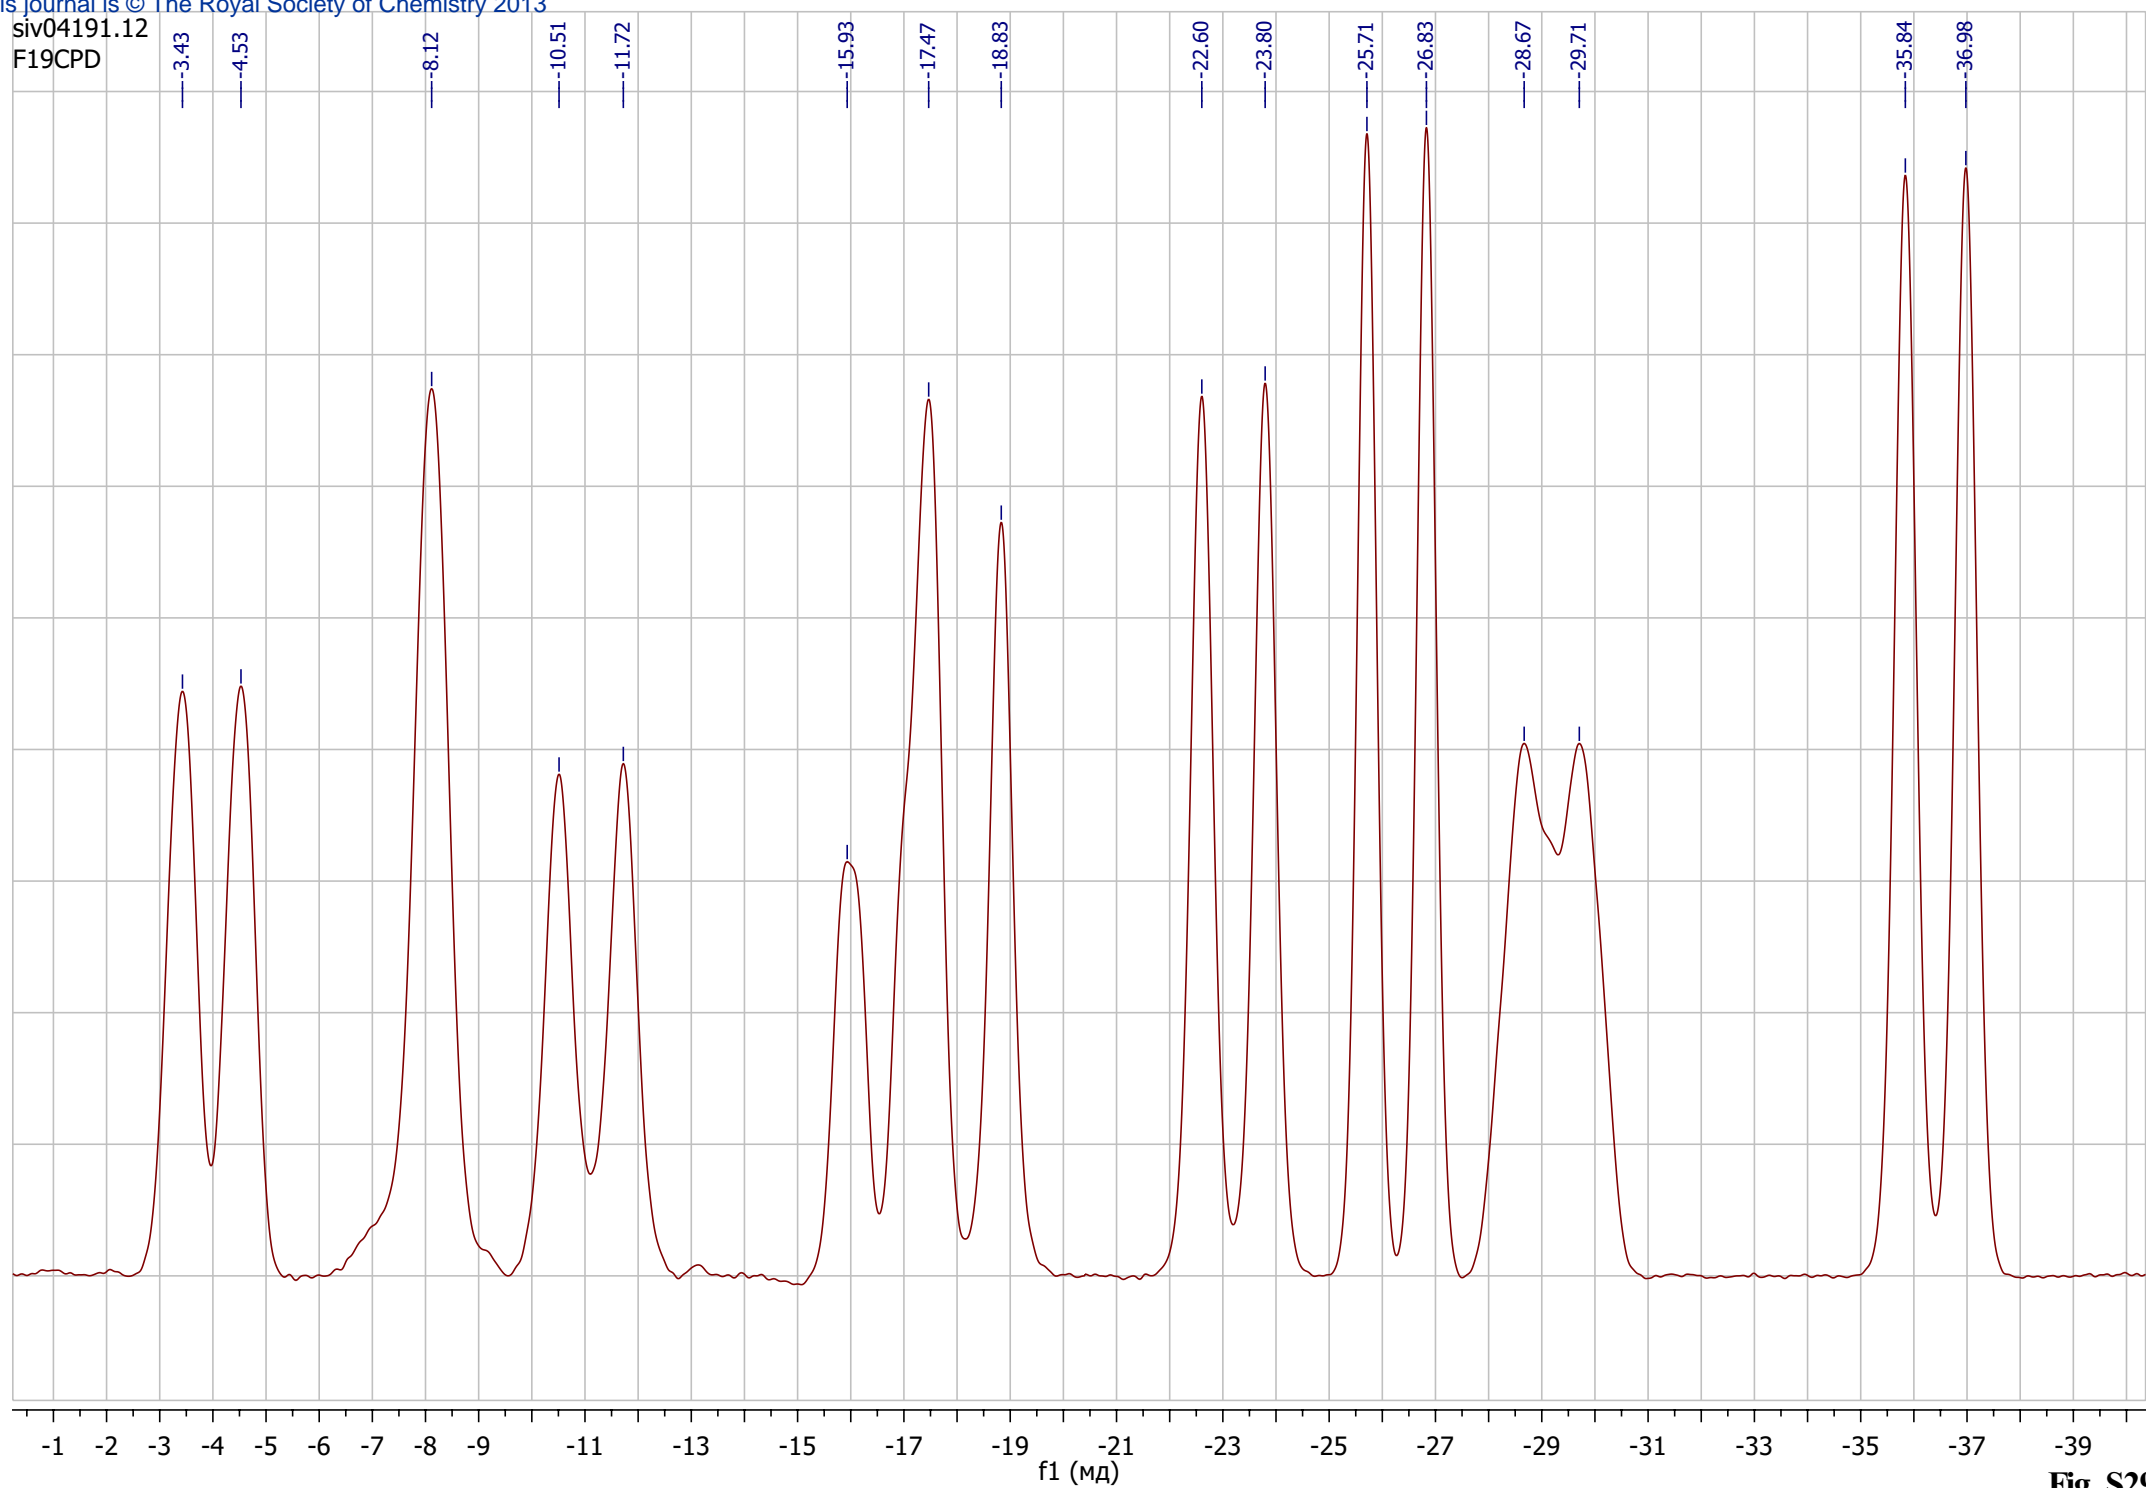

Fig. S29

siv10133.11

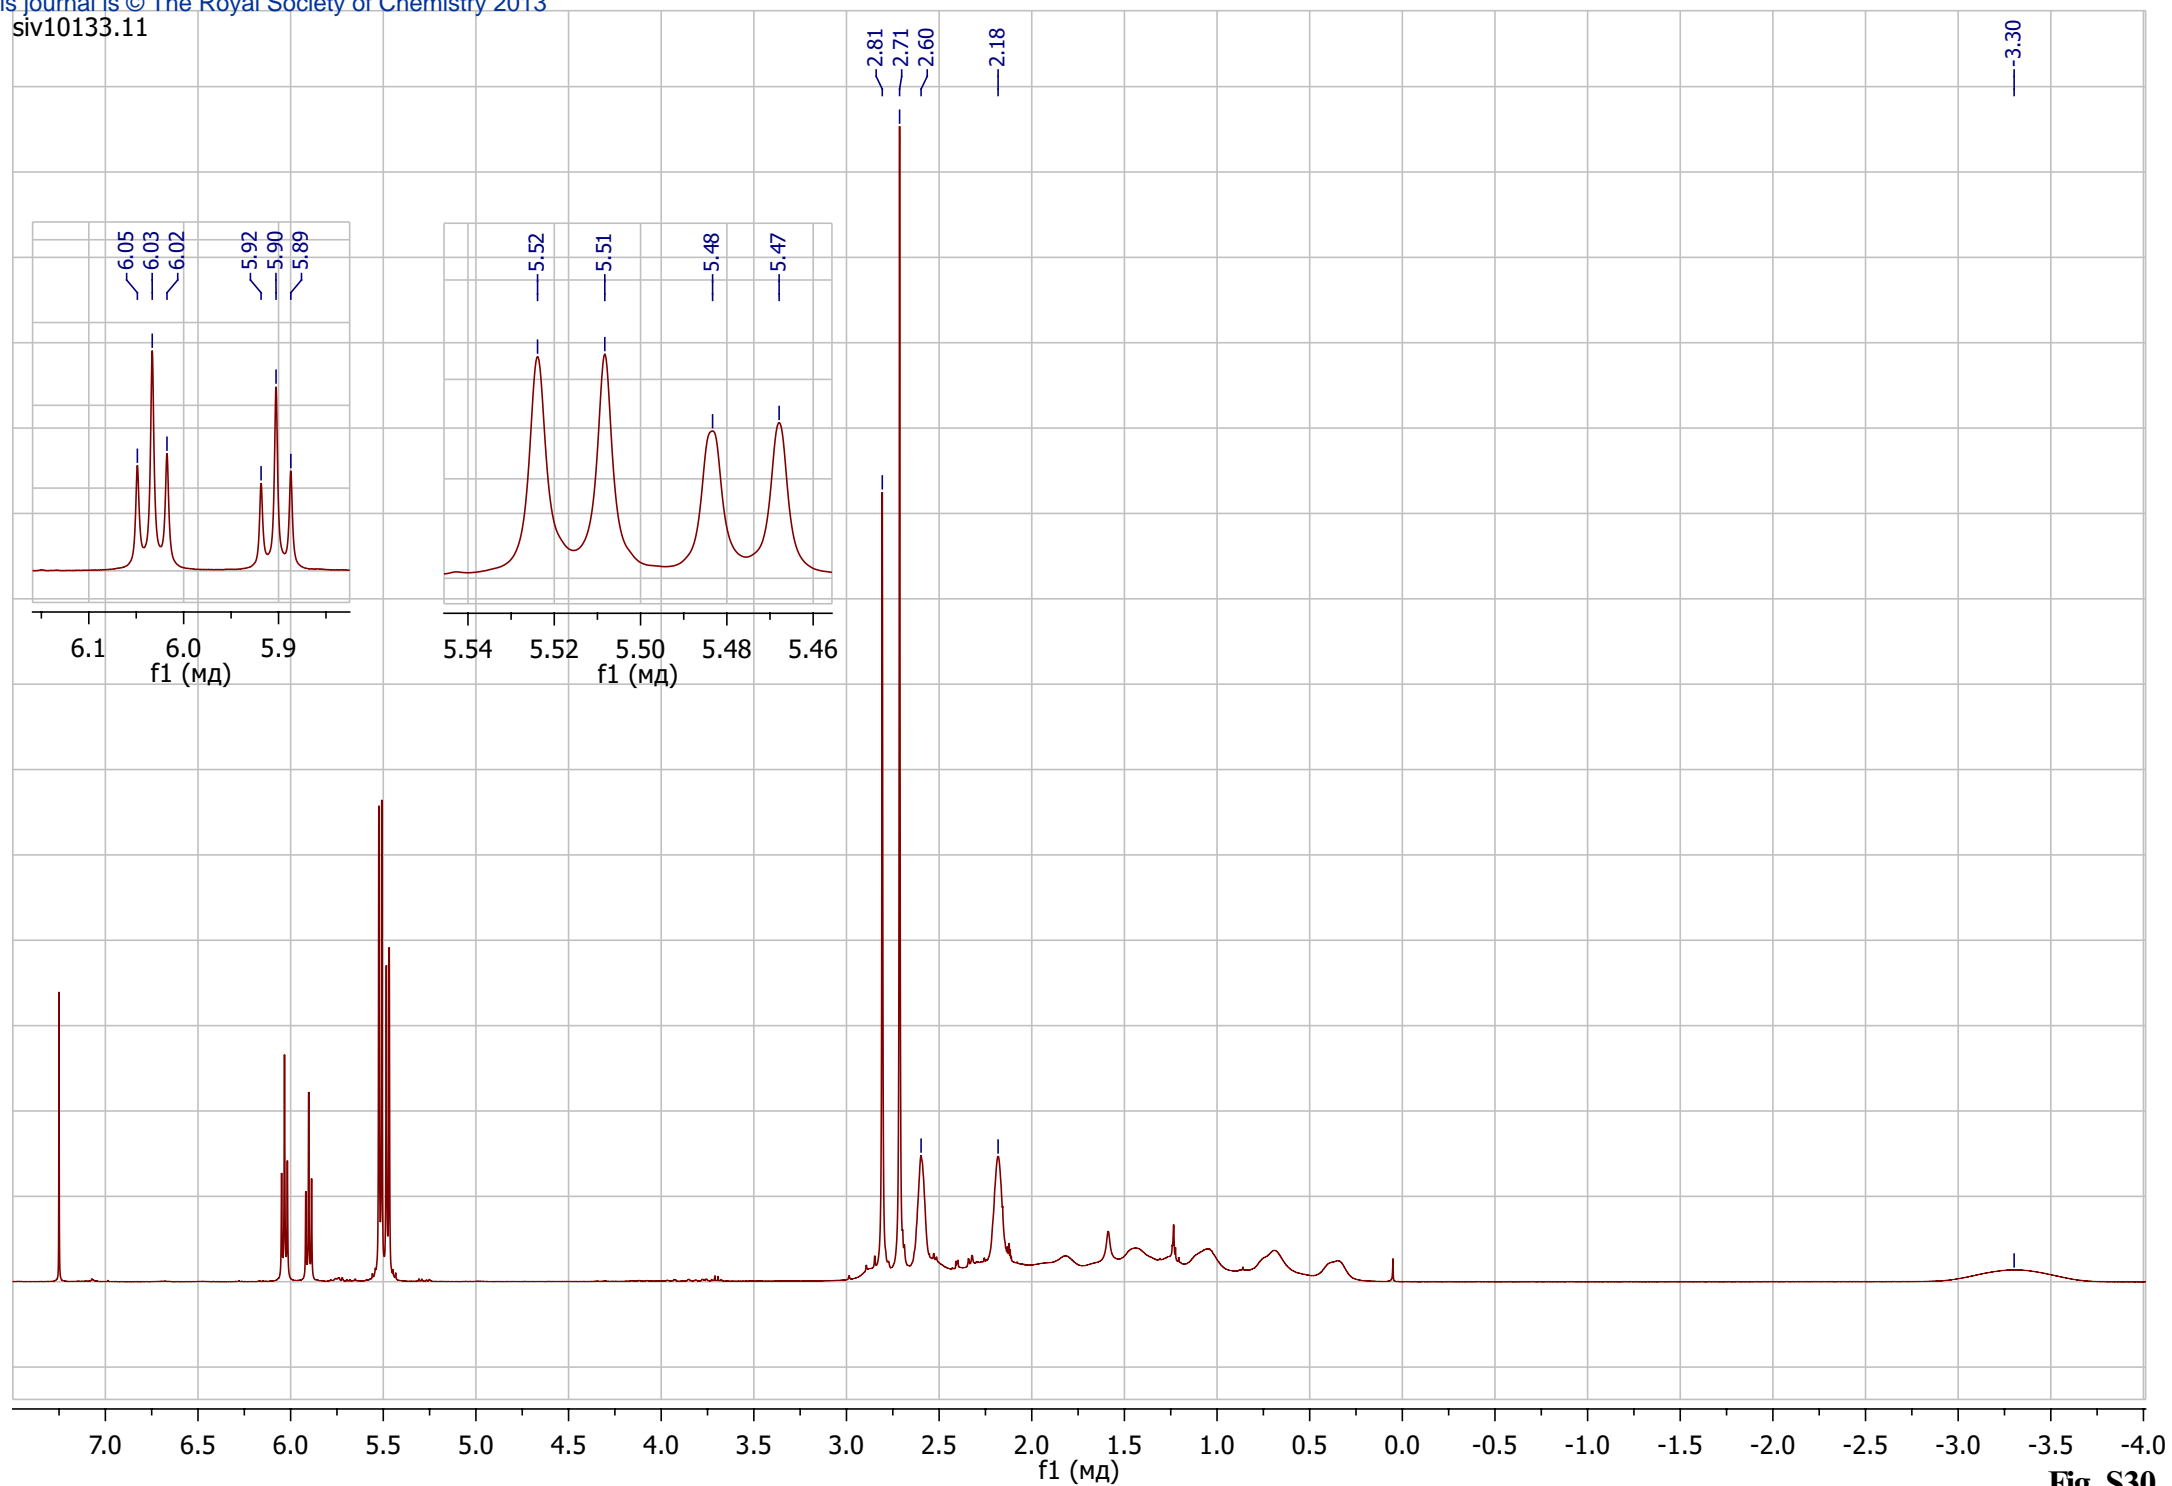

Fig. S30



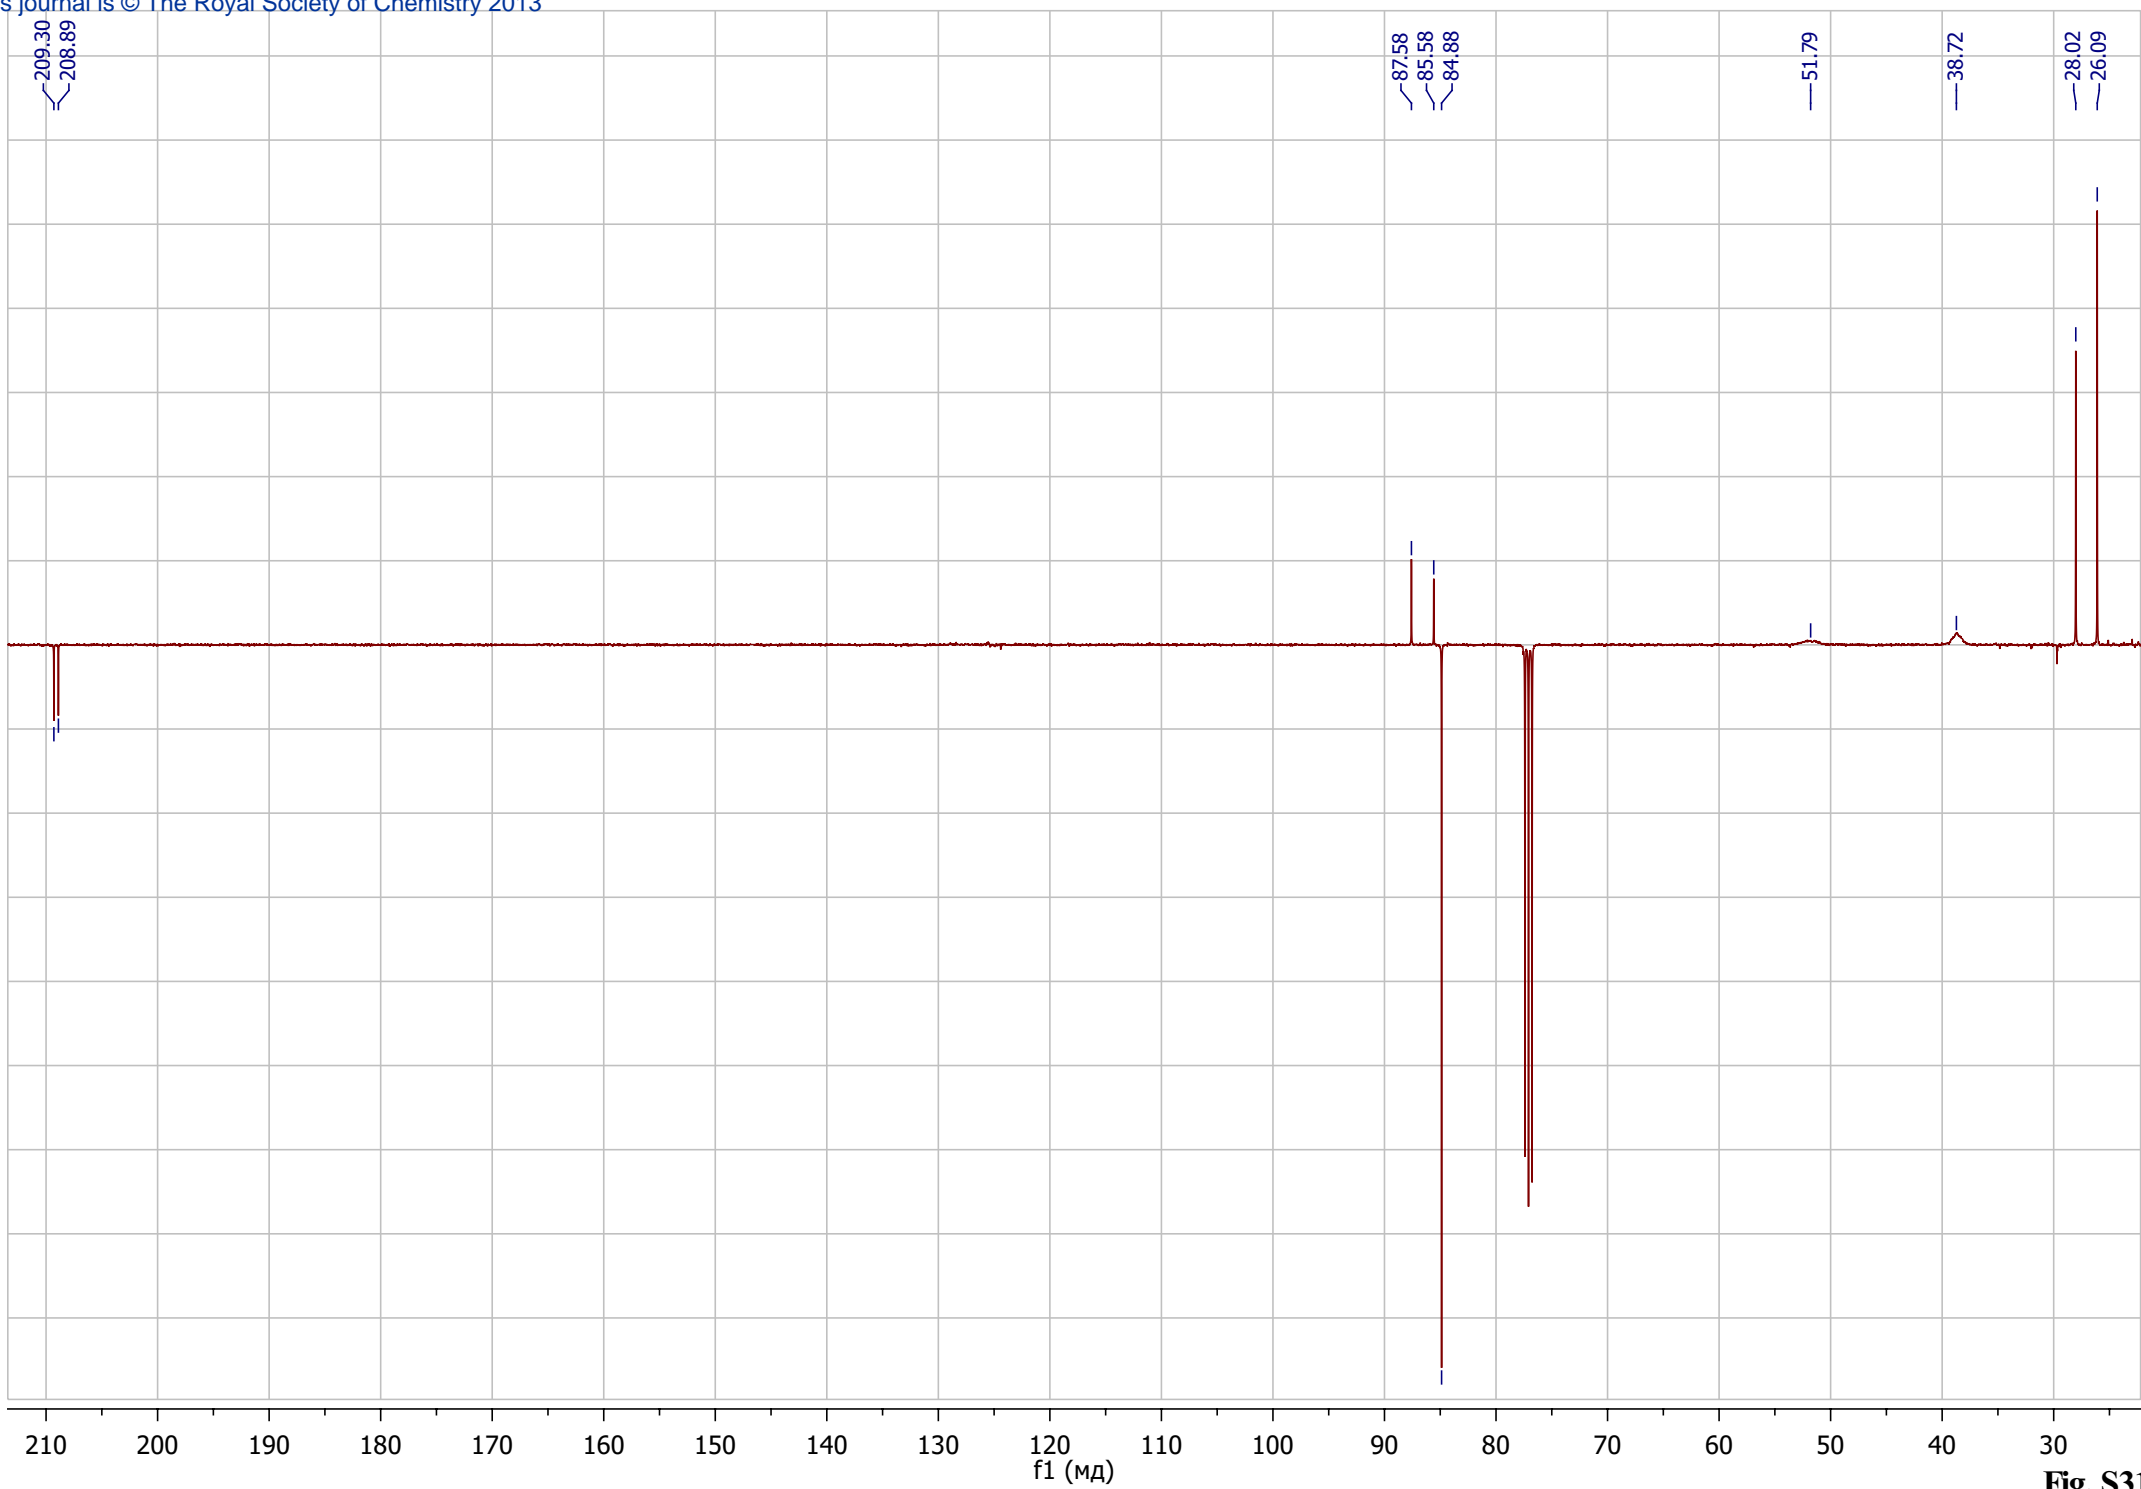

Fig. S31

siv10133.11

F19CPD

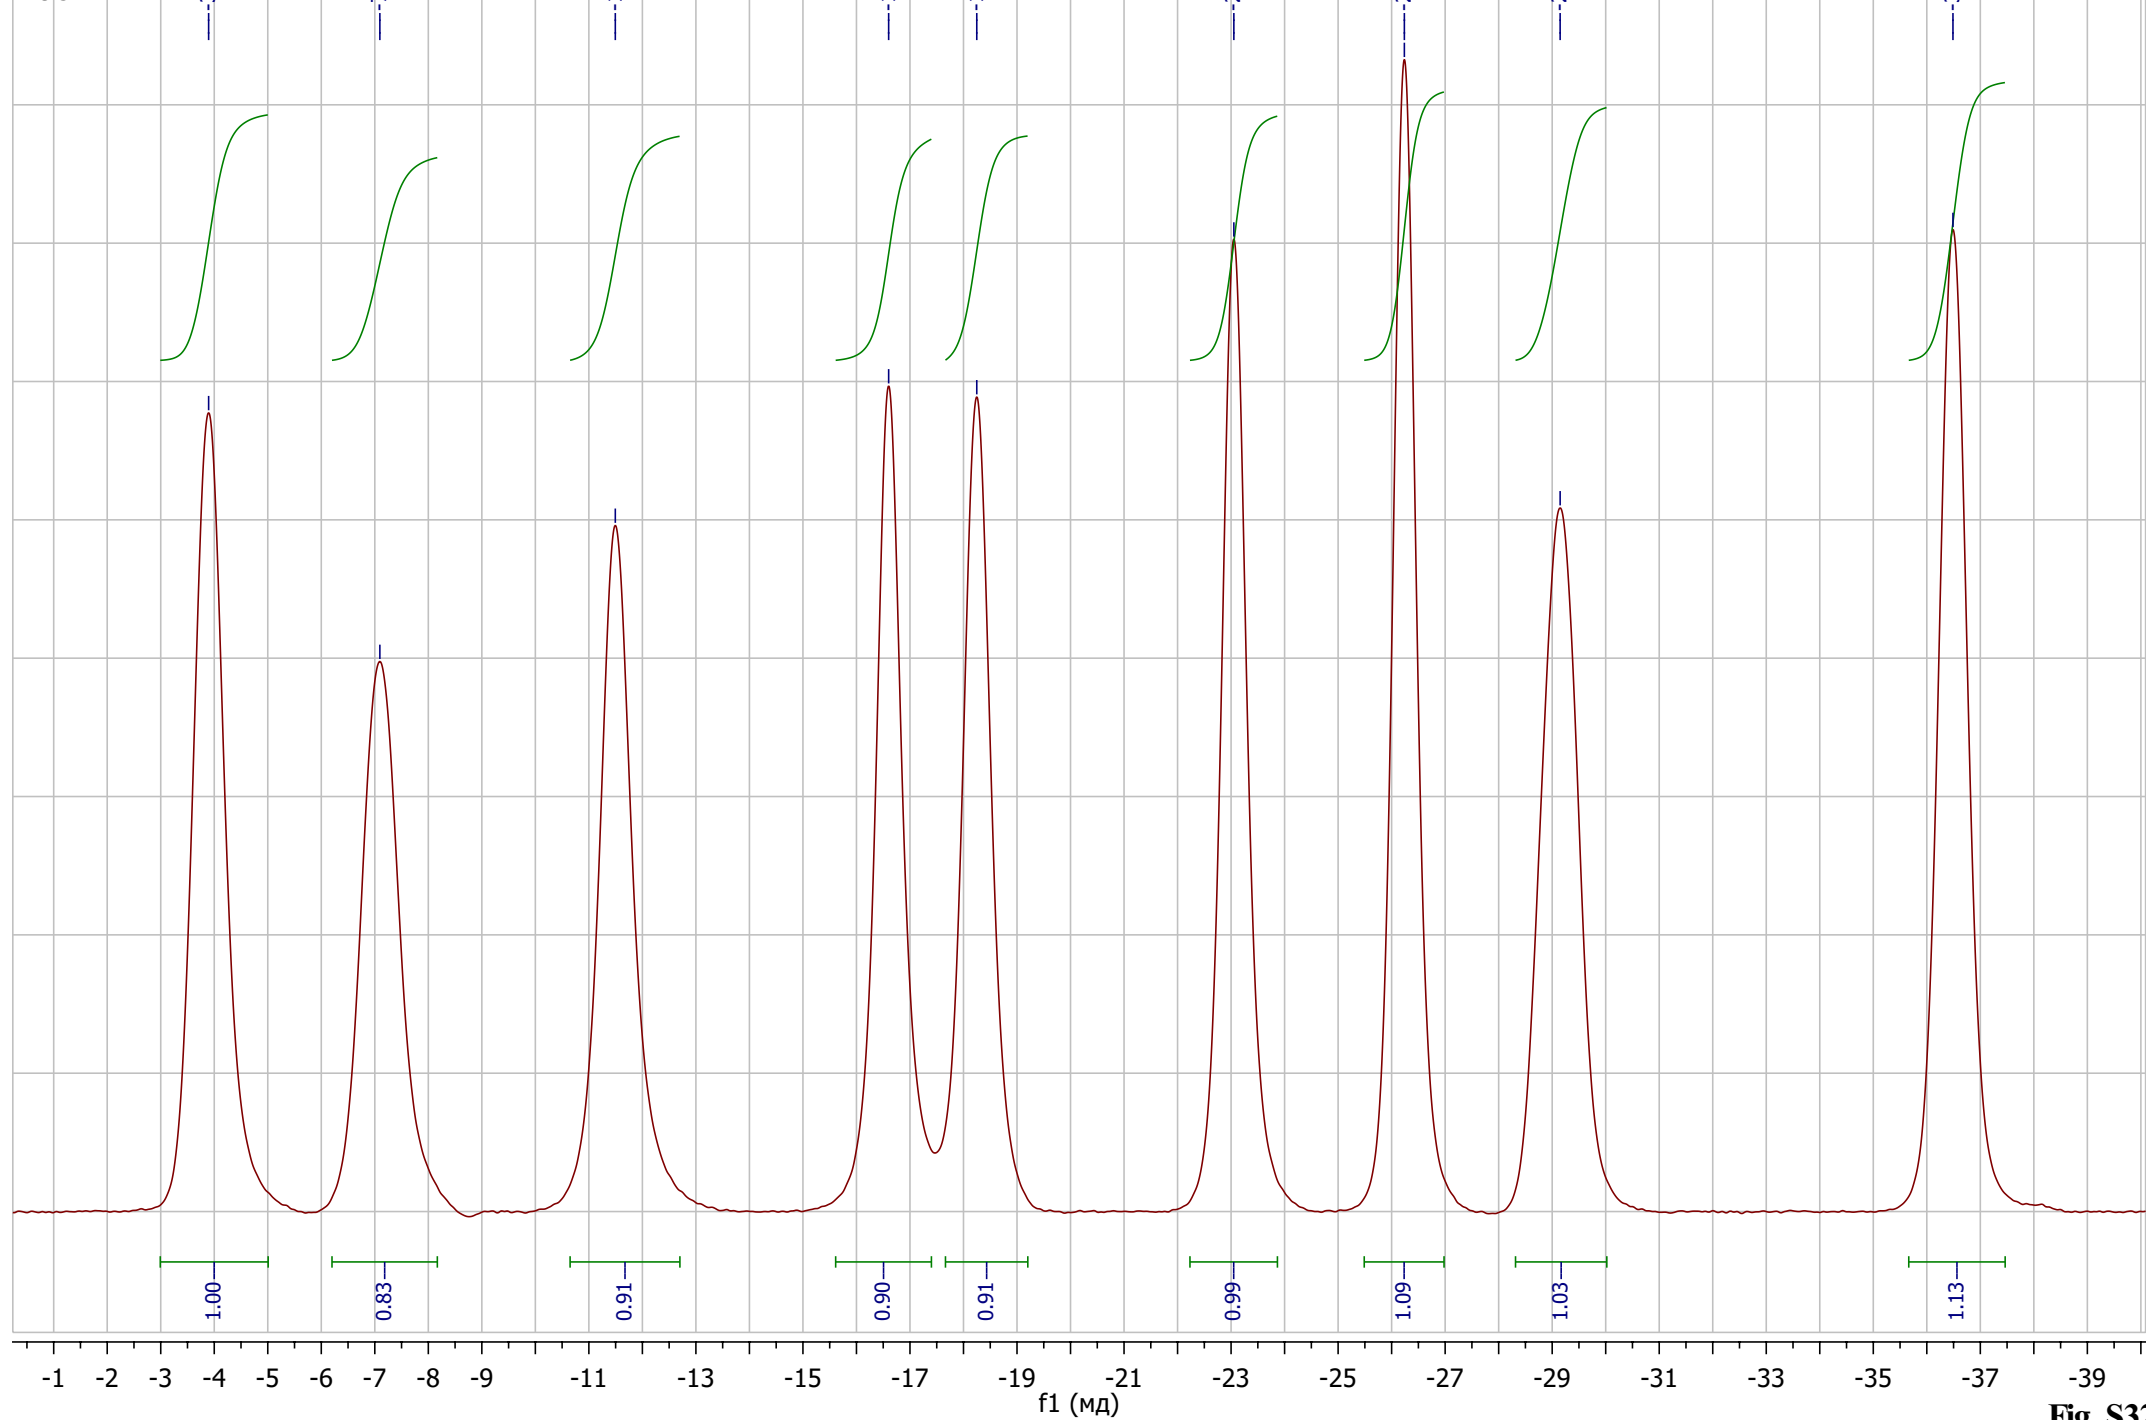

Fig. S32

siv10133.11  
F19CPD

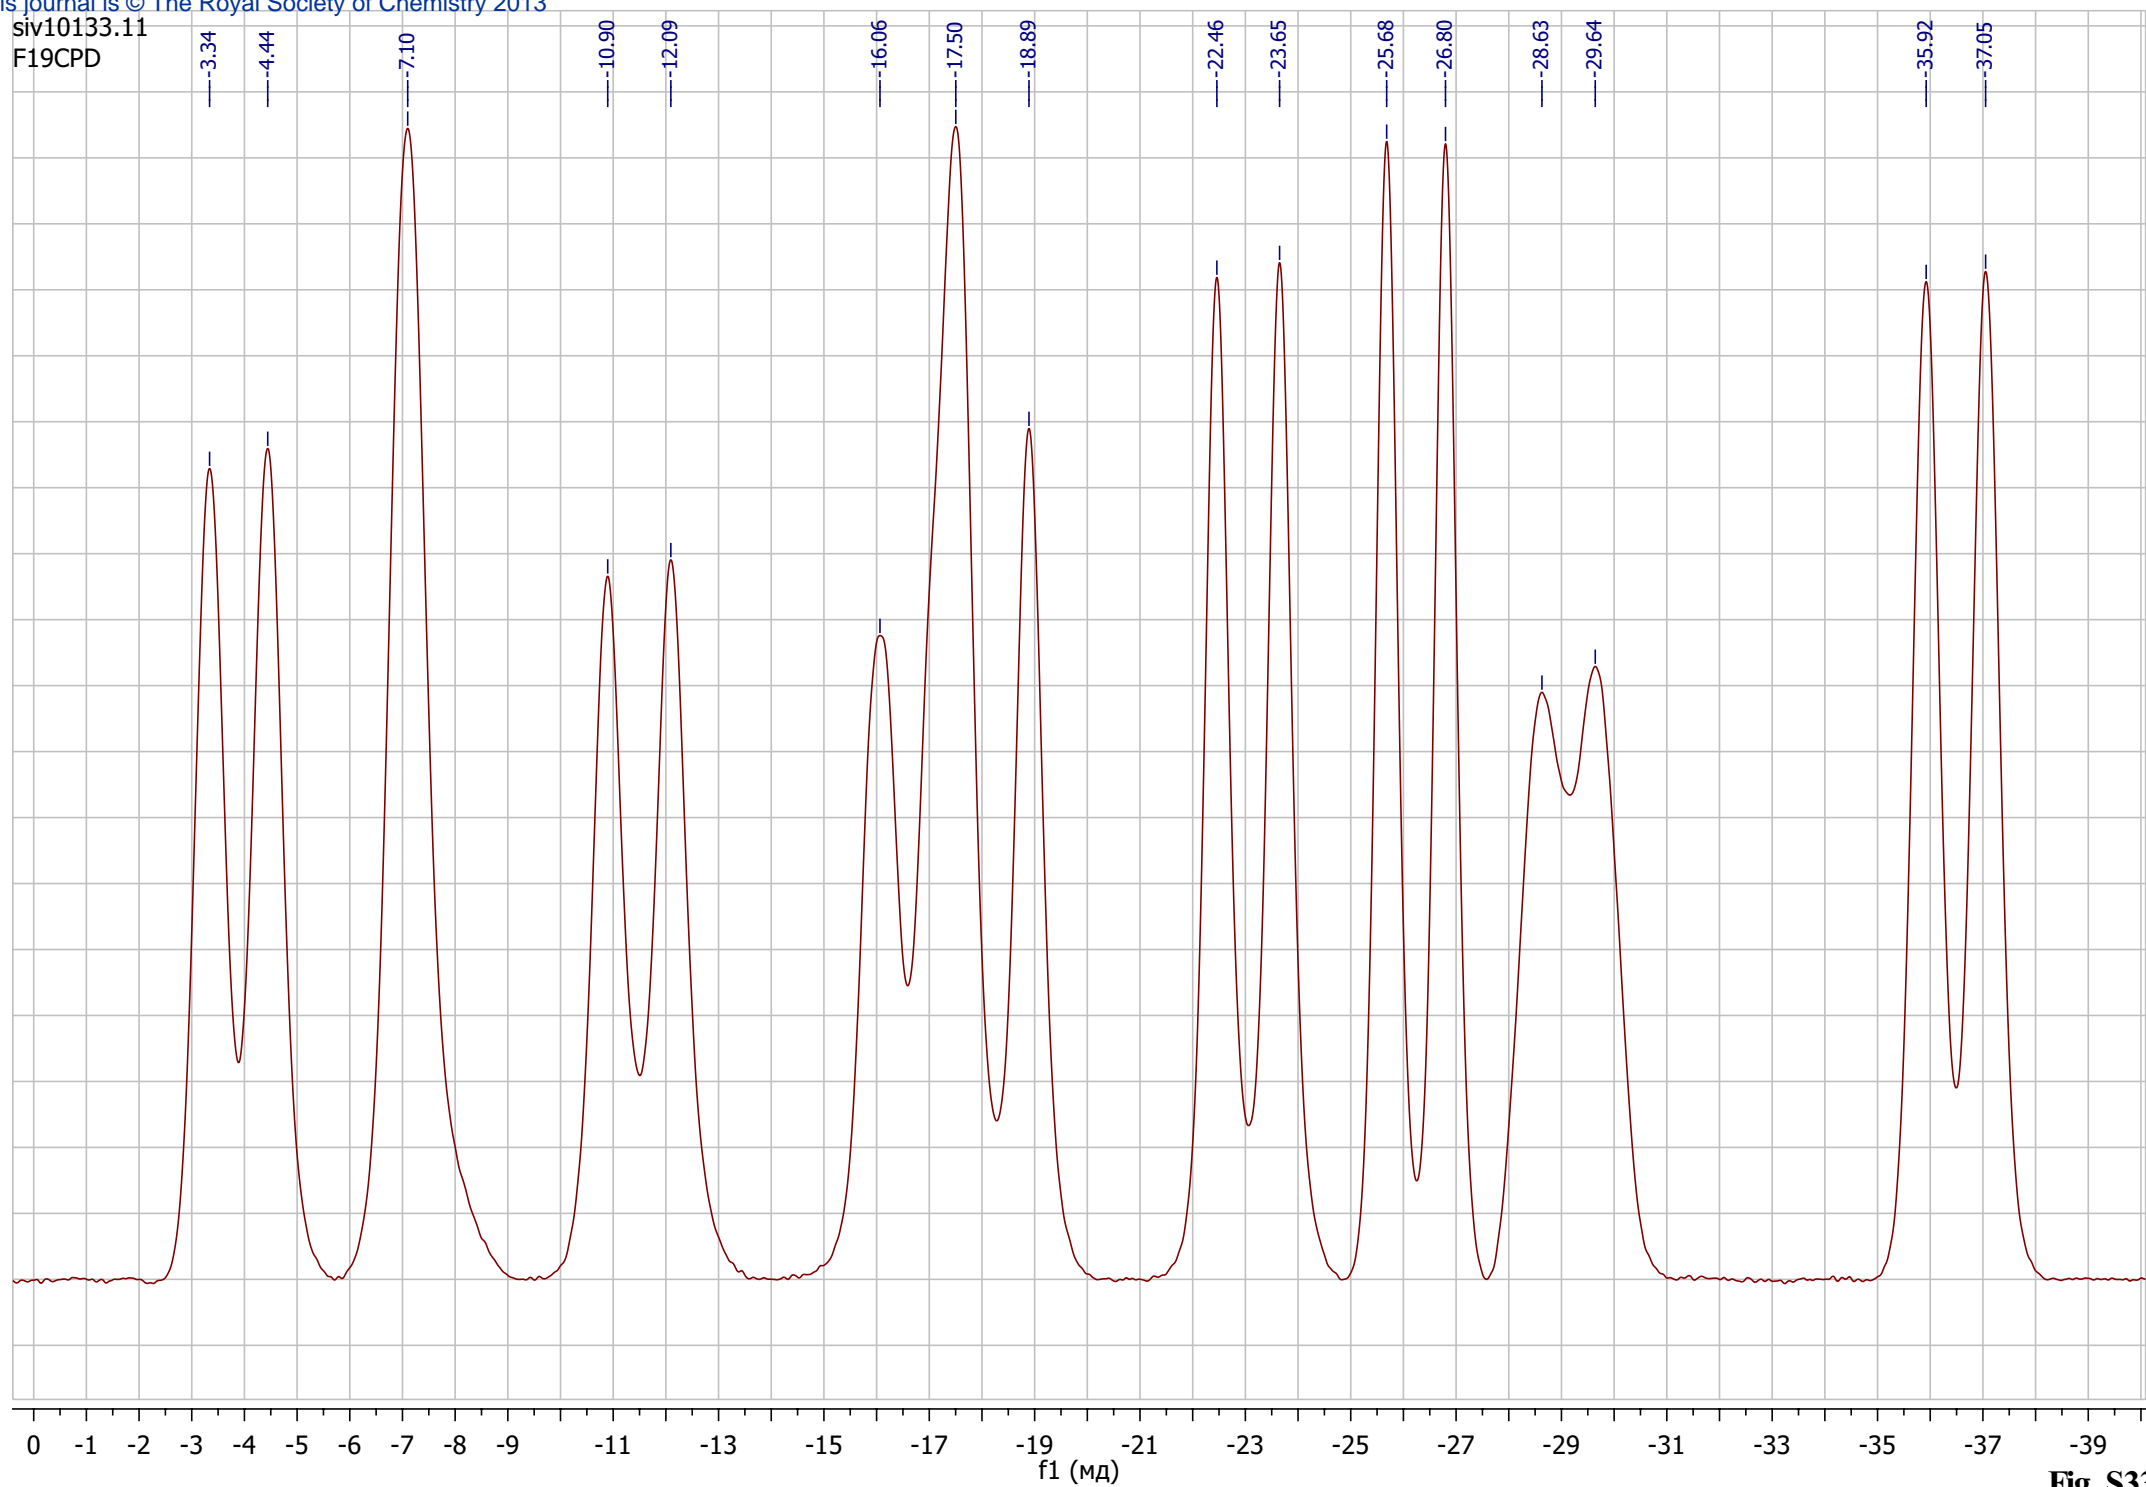

Fig. S33

Table S1. Bond lengths distribution in [9-RMeS-*nido*-7,8-C<sub>2</sub>B<sub>9</sub>H<sub>11</sub>] derivatives in comparison with [nido-7,8-C<sub>2</sub>B<sub>9</sub>H<sub>12</sub>]<sup>-</sup> anion

| Bond    | anion <sup>a</sup> | anion <sup>b</sup> | SMe <sub>2</sub> -derivative <sup>c</sup><br>first molecule | SMe <sub>2</sub> -derivative <sup>c</sup><br>second molecule | Compound 7 | Compound 5 |
|---------|--------------------|--------------------|-------------------------------------------------------------|--------------------------------------------------------------|------------|------------|
| B1-B2   | 1.761              | 1.757              | 1.740(5)                                                    | 1.724(5)                                                     | 1.755(3)   | 1.759(2)   |
| B1-B3   | 1.773              | 1.777              | 1.778(5)                                                    | 1.769(5)                                                     | 1.774(3)   | 1.782(2)   |
| B1-B4   | 1.767              | 1.775              | 1.774(4)                                                    | 1.777(5)                                                     | 1.774(3)   | 1.769(2)   |
| B1-B5   | 1.793              | 1.795              | 1.777(4)                                                    | 1.768(5)                                                     | 1.787(3)   | 1.782(2)   |
| B1-B6   | 1.799              | 1.798              | 1.795(4)                                                    | 1.793(5)                                                     | 1.811(3)   | 1.809(2)   |
| B2-B3   | 1.755              | 1.758              | 1.740(5)                                                    | 1.728(6)                                                     | 1.756(3)   | 1.757(2)   |
| B3-B4   | 1.762              | 1.770              | 1.769(5)                                                    | 1.768(5)                                                     | 1.778(3)   | 1.775(2)   |
| B4-B5   | 1.756              | 1.747              | 1.767(4)                                                    | 1.771(5)                                                     | 1.763(2)   | 1.771(2)   |
| B5-B6   | 1.823              | 1.820              | 1.797(4)                                                    | 1.790(5)                                                     | 1.811(3)   | 1.811(2)   |
| B6-B2   | 1.758              | 1.763              | 1.762(5)                                                    | 1.757(5)                                                     | 1.775(3)   | 1.773(2)   |
| B2-C7   | 1.716              | 1.715              | 1.690(5)                                                    | 1.679(5)                                                     | 1.698(2)   | 1.699(2)   |
| B3-C7   | 1.712              | 1.715              | 1.712(5)                                                    | 1.704(5)                                                     | 1.704(2)   | 1.707(2)   |
| B3-C8   | 1.718              | 1.731              | 1.740(5)                                                    | 1.738(5)                                                     | 1.725(2)   | 1.737(2)   |
| B4-C8   | 1.719              | 1.738              | 1.752(4)                                                    | 1.744(5)                                                     | 1.735(2)   | 1.736(2)   |
| B4-B9   | 1.795              | 1.796              | 1.749(4)                                                    | 1.757(4)                                                     | 1.759(3)   | 1.769(2)   |
| B5-B9   | 1.764              | 1.764              | 1.736(4)                                                    | 1.736(4)                                                     | 1.748(3)   | 1.741(2)   |
| B5-B10  | 1.782              | 1.781              | 1.779(4)                                                    | 1.776(4)                                                     | 1.796(3)   | 1.801(2)   |
| B6-B10  | 1.779              | 1.782              | 1.785(4)                                                    | 1.788(5)                                                     | 1.791(3)   | 1.795(2)   |
| B6-B11  | 1.779              | 1.768              | 1.775(5)                                                    | 1.777(5)                                                     | 1.800(3)   | 1.795(2)   |
| B2-B11  | 1.803              | 1.804              | 1.800(5)                                                    | 1.796(5)                                                     | 1.808(3)   | 1.812(2)   |
| C7-C8   | 1.555              | 1.564              | 1.525(4)                                                    | 1.531(4)                                                     | 1.550(2)   | 1.549(2)   |
| C8-B9   | 1.607              | 1.622              | 1.571(4)                                                    | 1.582(4)                                                     | 1.594(2)   | 1.591(2)   |
| B9-B10  | 1.831              | 1.813              | 1.775(4)                                                    | 1.773(4)                                                     | 1.780(3)   | 1.788(2)   |
| B10-B11 | 1.853              | 1.841              | 1.843(5)                                                    | 1.851(5)                                                     | 1.861(3)   | 1.863(2)   |
| B11-C7  | 1.614              | 1.621              | 1.623(5)                                                    | 1.613(5)                                                     | 1.637(2)   | 1.637(2)   |

<sup>a</sup> [nido-7,8-C<sub>2</sub>B<sub>9</sub>H<sub>12</sub>]<sup>-</sup> anion, refcode CENBUS<sup>1</sup>; <sup>b</sup> [nido-7,8-C<sub>2</sub>B<sub>9</sub>H<sub>12</sub>]<sup>-</sup> anion, refcode GUNHUS01<sup>1</sup>; <sup>c</sup> [9-Me<sub>2</sub>S-*nido*-7,8-C<sub>2</sub>B<sub>9</sub>H<sub>11</sub>], refcode VYUHIG<sup>1</sup>, there are two independent molecules in the asymmetric unit cell

## References

1. F.H. Allen, *Acta Crystallogr.*, **2002**, B58, 380; (b) *Cambridge Structural Database*, **2012**, Version 5.34
